1 **Depletion of Sun1/2 Induces Heterochromatin Accrual in Mesenchymal Stem**  
2 **Cells during Adipogenesis**

3 Matthew Goelzer<sup>1,4</sup>, Sean Howard<sup>1</sup>, Anamaria Zavala<sup>1</sup>, Daniel Conway<sup>3</sup>, Andre J van  
4 Wijnen<sup>2</sup>, Gunes Uzer<sup>1</sup>

5 <sup>1</sup>Boise State University, <sup>2</sup>University of Vermont, <sup>3</sup>Virginia Commonwealth University,  
6 <sup>4</sup>Oral Roberts University

7  
8 **Word count:** 4821

9  
10 **Key Words:** LINC, Nucleoskeleton, Nuclear Envelope, Adipogenesis, Heterochromatin,  
11 Mesenchymal Stem Cells

12  
13 Funding support: AG059923, P20GM109095, NSF1929188 & 2025505

14  
15 **Corresponding author:**

16 Gunes Uzer PhD

17 Boise State University

18 Department of Mechanical & Biomedical Engineering

19 1910 University Drive, MS-2085

20 Boise, ID 83725-2085

21 Ph. (208) 426-4461

22 **Email:** [gunesuzer@boisestate.edu](mailto:gunesuzer@boisestate.edu)

23

24 **Abstract**

25 Mechanical signals regulate adipogenic differentiation of mesenchymal stem cells  
26 (MSCs). Critical to the mechano-regulation of MSCs, Linker of the Nucleoskeleton and  
27 Cytoskeleton (LINC) complexes are integral to both nucleo-cytoskeletal signal  
28 transduction and structural integrity of the nucleus. The LINC complex is made of  
29 Nesprin proteins that associate with the cytoskeleton on the outer nuclear membrane  
30 (ONM) and Sun proteins that bound to nuclear lamina and chromatin at the inner  
31 nuclear membrane (INM). In addition to their role in the LINC complex function,  
32 depletion of Sun1/2 effects chromosomal tethering to the nuclear envelope, nuclear  
33 morphology, and chromatin organization. Suggesting that Sun1/2 proteins may regulate  
34 chromatin organization and adipogenic differentiation independent of the LINC complex  
35 mediated nucleo-cytoskeletal connectivity. To test this hypothesis Sun1/2 depletion was  
36 compared to expression of a dominant-negative KASH (dnKASH) domain to decouple  
37 nucleus from cytoskeleton by inhibiting Nesprin-SUN association. Sun1/2 depletion  
38 inhibited fat droplet formation and production of adipogenic proteins such as *Adipoq*,  
39 which were supported by RNA-seq showing decreased adipogenesis. In contrast  
40 dnKASH responded oppositely, increasing fat droplet formation, *Adipoq* and adipogenic  
41 gene expression. At the chromatin level, Sun1/2 depletion increased H3K9me3 levels,  
42 increased H3K9me3 foci count, and enrichment on *Adipoq*. No increase of H3K9me3  
43 levels, foci count, or increased H3K9me3 enrichment on *Adipoq* was found during  
44 dnKASH expression. We conclude that physically decoupling of the LINC complex via  
45 dnKASH accelerates adipogenesis and that depletion of Sun1/2 increases  
46 heterochromatin accrual and inhibits adipogenesis independent of the LINC complex  
47 function.

## 48 **Introduction**

49 Linker of the Cytoskeleton and Nucleoskeleton (LINC) complex is a regulator for  
50 mechanical and biochemical signal transduction to the cell nucleus<sup>1</sup>. The LINC complex  
51 achieves this role in-part by connecting the nucleus to cytoskeletal proteins of actin,  
52 microtubules, and intermediate filaments. The LINC complex is composed of Sun1/2  
53 and Nesprins<sup>2</sup>. Nesprin proteins are found on the outer nuclear membrane (ONM)  
54 where their N-termini are bound to cytoskeletal proteins in the cytoplasm and their C-  
55 termini are located in the perinuclear space (PNS)<sup>3,4</sup>. Inside the PNS KASH domain  
56 located on the C-termini of Nesprins binds to C-termini of SUN domain<sup>5</sup>. Sun protein N-  
57 termini spans into the inner nuclear membrane (INM) where was reported to interact  
58 with both A-type and B-type Lamins<sup>6</sup>, emerin<sup>7</sup>, nuclear pore complexes<sup>8</sup> and associate  
59 with telomeric ends of DNA at the INM within the context of DNA repair<sup>9</sup> and  
60 Meiosis<sup>10,11</sup>.

61  
62 Mesenchymal Stem Cells (MSCs) are multipotent cells that differentiate into  
63 musculoskeletal lineages such as myoblasts, adipocytes, osteoblasts, and  
64 chondrocytes. Regulation of MSC fate is highly dependent upon their ability to sense  
65 extracellular mechanical cues and transmit this information to the chromatin. For  
66 example, disruption of the LINC complex function via expression of the dominant-  
67 negative KASH (dnKASH) where dnKASH interferes with Sun-Nesprin binding,  
68 increases histone deacetylase (HDAC) activity in human MSCs, leading to decreased  
69 expression of the osteogenesis marker Runx2 and increased expression of the  
70 adipogenesis marker Pparg<sup>12</sup>. Disabling LINC function via dnKASH also impairs the

71 mechanical-activation of focal adhesion signaling molecules FAK and Akt<sup>13</sup> as well as  
72 inhibiting the nuclear import of mechanoresponsive proteins  $\beta$ -Catenin<sup>14</sup> and Yap<sup>15</sup> that  
73 known to have proliferative<sup>16-18</sup> and anti-adipogenic<sup>19-22</sup> functions in MSCs. Function  
74 loss similar to dnKASH overexpression is also reported after depletion of Sun and  
75 Nesprin proteins. For example, stress-induced chromatin stretching was abolished  
76 upon depletion of Sun1/2 proteins<sup>23</sup>. Similar to dnKASH, siRNAs against Sun1/2 impairs  
77 the activation of focal adhesion proteins FAK and Akt<sup>13</sup> as well as inhibiting the nuclear  
78 import of  $\beta$ -Catenin<sup>24</sup>. Yap also experiences inhibition of translocation into the nucleus  
79 during siRNA mediated depletion of Nesprin1<sup>25</sup>.

80

81 Recent findings indicate that Sun1/2 elements through their associations with LEM  
82 domain proteins, has direct links to the chromatin and ultimately regulation of the  
83 genome<sup>26,27</sup>. For example in flies with LINC complex mutations, BAF localization at the  
84 nuclear envelope is eliminated in which the LEM-domain protein Otefin is excluded,  
85 resulting in elevated DNA content<sup>28</sup> and disrupted DNA endo-replication across  
86 myofibers<sup>29</sup>. In the chromatin of mammalian cells, Sun1/2 proteins tether chromatin to  
87 the nuclear envelope through direct connections to Emerin<sup>30</sup>. Another functional role of  
88 Sun proteins were demonstrated during meiosis where *Sun1*<sup>-/-</sup> mouse cells have  
89 impaired homologous synapsis during oogenesis and display disrupted telomere  
90 association<sup>31</sup>. These findings were supported by chromatin capture studies where  
91 depletion of Sun proteins disrupts the alignment of ends of different chromosomes via  
92 altering telomere binding to the nuclear envelope<sup>32</sup>. Revealing a structural role of Sun  
93 proteins in the nucleus, both our group and others have reported that depletion of



94 Sun1/2 decreases nuclear stiffness<sup>33,34</sup>. In our study, Sun1/2 co-depletion was  
95 accompanied by increased heterochromatic spot area on isolated nuclei<sup>26</sup>, suggesting  
96 that Sun mediated changes in heterochromatin organization. As MSC differentiation  
97 requires a synergy between epigenetic control and chromatin organization<sup>35</sup>, depleting  
98 Sun proteins may affect MSC differentiation. During adipogenesis for example, inhibition  
99 of heterochromatin H3K27me3 via methyltransferase Ezh2 inhibition results in  
100 increased protein levels of Adipoq, Fabp4, and decreased osteogenic gene  
101 expression<sup>36</sup>. We have recently reported that depletion of a Sun1/2 binding partner and  
102 a nuclear envelope protein, Lamin A/C, decreases MSC adipogenesis independent of  
103 mechanical stimulation<sup>37</sup>, suggesting that structural proteins at the INM may have  
104 mechanically independent roles to control MSC function.

105

106 Therefore, Sun1/2 proteins may have overlapping structural and mechanical roles  
107 regulating chromatin organization and MSC adipogenesis. However, it is not clear  
108 whether Sun proteins may regulate MSC differentiation through their structural role,  
109 independent of LINC complex mediated mechanical information. To investigate the  
110 LINC-independent role of Sun1/2 in regulating chromatin organization and adipogenic  
111 differentiation, we compared siRNA-mediated depletion of Sun1/2 to the over  
112 expression of the dnKASH domain to block Sun-Nesprin association<sup>38</sup>.

113

114

115

116

117 **Results**

118 *siSun and dnKASH expression alter nuclear morphology*

119 We first investigated the effects of Sun1/2 depletion on nuclear morphology. Shown in  
120 **Fig. 1a** MSCs treated with siRNA targeting Sun1/2 (siSun) were stained for Sun1  
121 (green), Sun2 (red), and DNA via Hoechst staining (blue). siSun treatment reduced  
122 Sun1 and Sun2 intensity levels by 47% (n = 1478, P < 0.0001, **Fig. 1a**) and 52% (n =  
123 1478, P < 0.0001, **Fig. 1b**), respectively, compared to siCntl treated MSCs. siSun-  
124 treated MSCs grown in growth media (GM) experienced an increase in nuclear area by  
125 7% (P < 0.01) and perimeter by 8% (P < 0.0001) shown in **Fig. 1d** and **1e** respectively,  
126 when compared to siCntl-treated MSCs. The nuclear circularity decreased by 9% in  
127 siSun-treated cells compared to siCntl-treated cells shown in **Fig. 1f** (p<0.001).

128

129 To understand the effects of disabling LINC function on nuclear morphology of the  
130 nucleus, mCherry-tagged dnKASH was expressed via doxycycline (Dox) inducible  
131 stably infected dnKASH plasmid in MSCs. We first established the functionality of  
132 dnKASH by measuring Nesprin mislocalization from the nuclear envelope upon +Dox  
133 treatment (**Fig.S1**). dnKASH nuclei were imaged through Hoechst staining (blue) to  
134 reveal nuclear morphology changes, shown in **Fig. 2a**. In **Fig. 2b** doxycycline treatment  
135 of MSCs in growth media (GM+Dox) had a 133% increase in mCherry intensity  
136 compared to GM MSCs with no doxycycline treatment (n = 5332, P < 0.0001). GM+Dox  
137 MSCs had a decreased nuclear area by 14% (P < 0.001, **Fig.2c**) compared to control  
138 MSCs in GM. The nuclear perimeter had a slight decrease of 1% in the GM+Dox  
139 treatment group compared to the GM control group (P < 0.05, **Fig. 2d**). The circularity

140 also experienced a decrease of 6% in GM+Dox treatment samples compared to GM  
141 samples ( $P < 0.0001$ , **Fig.2e**).

142

### 143 *Depletion of Sun1/2 Inhibits Adipogenesis*

144 We next investigated adipogenesis in Sun1/2 depleted MSCs. Comparing the siCntl-  
145 treated MSCs cultured in growth media (siCntl GM) to MSCs cultured in adipogenic  
146 media (siCntl AM) via western blot analysis showed a robust increase of adipogenesis  
147 markers Adipoq (600%,  $P < 0.01$ ), Cebpa (400%,  $P < 0.01$ ), and Pparg (200%,  $P <$   
148 0.01). No increase was observed in Adipoq and Pparg in siSun-treated MSCs in  
149 adipogenic media (siSun AM) when compared to siCntl GM samples (**Fig. 3a**). Shown  
150 in **Figs 3b-c**, comparing siCntl AM and siSun AM samples showed a significant  
151 reduction of Adipoq (92%,  $P < 0.01$ ) and Pparg (58%,  $P < 0.001$ ) protein levels in siSun  
152 AM samples. Cebpa also experienced a decreasing but not significant trend in siSun  
153 AM samples (38%,  $P = 0.22$ ). To further investigate the adipogenic phenotype lipid  
154 droplets were imaged via lipid droplet staining (LipidSpot 488, Biotium, CA, **Fig. 3e**).  
155 Shown in **Fig. 3f**, the quantification of the mean fluorescent lipid droplet intensity per cell  
156 from individual imaging fields showed a 2000% increase between siCntl GM and siCntl  
157 AM treated cells ( $P < 0.0001$ ). Lipid droplet image analysis also revealed 83% reduction  
158 of lipid droplets in the siSun AM treatment group compared to siCntl AM ( $P < 0.0001$ ).  
159 Comparison of siSun AM and siSun GM groups showed a slight 20% increase of lipid  
160 droplet formation in siSun AM-treated MSCs ( $P < 0.0001$ ).

161

### 162 *dnKASH Expression Accelerates Adipogenesis in MSCs*

163 As depletion of Sun1/2 induced decreased adipogenesis, the effects of dnKASH  
164 expression during adipogenesis was next investigated. Doxycycline alone did not alter  
165 the rate of adipogenesis differentiation in non-modified MSCs (**Fig. S2**). During  
166 adipogenesis of stably infected dnKASH-MSCs doxycycline treated samples (AM+Dox)  
167 we observed increased levels of adipogenesis markers Adipoq, Cebpa, and Pparg  
168 compared to samples grown in AM without doxycycline treatment (**Fig. 4a**). Analysis of  
169 western blots revealed significant increases of Adipoq by 98% ( $P < 0.01$ , **Fig. 4b**) and  
170 Pparg by 90% in the AM+Dox treated group compared to the AM controls ( $P < 0.05$ ,  
171 **Fig. 4d**). Cebpa experienced no increase in AM+Dox samples compared to AM  
172 samples ( $P = 0.38$ , **Fig 4c**). Comparing doxycycline-treated GM+Dox to AM+Dox  
173 samples showed increased levels of Adipoq (1000%,  $P < 0.0001$ ), Cebpa (300%,  $P <$   
174  $0.01$ ), and Pparg (250%,  $P < 0.05$ ). The AM group had a 500% increase in Adipoq  
175 protein levels compared to the GM treated MSCs ( $P < 0.01$ ). Cebpa ( $P = 0.28$ ) and  
176 Pparg ( $P = 0.56$ ) experienced no significant increases in AM samples compared to GM  
177 samples. Shown in **Fig. 4e**, AM+Dox treatment increased fat droplets by 258%  
178 compared to AM samples ( $P < 0.05$ , **Fig. 4f**). Lipid droplet amounts also had significant  
179 increases in AM compared to GM (2,400%,  $P < 0.0001$ ) and AM+Dox compared to  
180 GM+Dox (6,000%,  $P < 0.0001$ ).

181

### 182 *Sun1/2 Depletion Decreases Adipogenesis and Lipid Metabolism Related Genes*

183 RNA-seq was performed on siSun and siCntl samples cultured under GM and AM  
184 conditions. DESEQ2 analyses were performed between treatment pairs and genes  
185 were filtered by having a significant gene expression differential (fold change  $\geq 2$ -fold,  $P$

186 < 0.05). Hierarchical clustering of these significant genes generated the heatmap in **Fig.**  
187 **5a** which shows separated clustering of siSun and siCntl treated cells. Both siSun and  
188 siCntl sample clades display additional clustering that further separated AM and GM  
189 cultured cells, indicating different gene expression profiles under adipogenic or growth  
190 media conditions. Shown in **Fig. 5b**, variance of principle components 1 and 2 were  
191 16.2% and 19.9%. Performing DAVID and STRING analyses to identify the most  
192 differentially expressed pathways and genes showed thirteen pathways with an FDR <  
193 0.05 that were either significantly up regulated (**Figs. 5c & S3**) and down regulated  
194 (**Figs. 5d & S4**) in siSun AM samples compared to siCntl AM samples. As shown **Fig.**  
195 **5c** and in STRING analysis (**Fig. S3**), inflammatory response was robustly upregulated  
196 in the siSun AM treatment group, potentially highlighting a regulatory role of Sun1/2 for  
197 inflammation pathways. Indicating that Sun1/2 depletion strongly inhibits adipogenic  
198 transcriptome, three out of nine down-regulated pathways in the siSun AM groups were  
199 related to adipogenesis or lipid metabolism (**Fig. 5d**, blue bars). Further highlighting a  
200 strong suppression of adipogenesis in the siSun AM group, **Fig. 5e** shows FPKM values  
201 of adipogenic or lipid metabolism genes that were both significantly expressed (fold  
202 change  $\geq 1$ ,  $P < 0.05$ ) and were highlighted in DAVID analysis pathway analyses (FDR <  
203 0.05). Tables of DAVID analysis pathways can be found in **Tables S1 and S2**.

204

#### 205 *Dominant-Negative KASH Expression Upregulates Adipogenesis Related Pathways*

206 To understand the accelerated adipogenesis during dnKASH expression, RNA-seq was  
207 performed on samples treated with or without doxycycline ( $\pm$ Dox) under GM and AM  
208 conditions. Like the earlier RNA-seq analysis, DESEQ2 analyses were performed

209 between treatment pairs and genes were filtered by having a significant gene  
210 expression differential (fold change  $\geq 2$ -fold,  $P < 0.05$ ). Shown in **Fig. 6a**, hierarchical  
211 heatmap of these genes showed a clustering of +Dox treatments (i.e. dnKASH  
212 expression) regardless of the media type used. AM cultured cells were further  
213 separated inside their respective  $\pm$ Dox clades. Shown in **Fig. 6b**, principle component  
214 plot showed variance of principle components 1 and 2 were 25.2% and 16.9%  
215 respectively. We next performed DAVID and STRING analyses to identify the most  
216 differentially expressed pathways (FDR  $< 0.05$ ). Showing an opposite that of siSun  
217 treatment, the AM +Dox treatment group had downregulated inflammatory and immune  
218 pathways, such as immune system response and response to cytokines (**Figs. 6d &**  
219 **S5**). Focusing on upregulated pathways showed that lipid metabolism, fatty acid  
220 metabolism and PPAR signaling were upregulated in the AM+Dox group when  
221 compared to AM only (**Figs. 6c**, blue bars). Highlighting the accelerated adipogenesis  
222 under dnKASH expression, **Fig. 6e** shows higher FPKM values of adipogenic or lipid  
223 metabolism genes that were both significantly expressed and were highlighted in both  
224 DAVID and STRING analysis (**Fig. S6**). In order to control for doxycycline effect,  
225 expression of dnKASH domain via a secondary plasmid vector that does not utilize  
226 doxycycline inducement also showed increased adipogenic marker gene expression  
227 during dnKASH expression (**Fig. S7c**). Tables of DAVID analysis pathways can be  
228 found in **Tables S3 and S4**.

229

230 *H3K9me3 Levels and Enrichment at the adipogenic gene Adipoq Increases During*  
231 *Sun1/2 depletion*

232 As chromatin organization is a strong regulator of differentiation, we next investigated  
233 alterations to heterochromatin and euchromatin in siSun-treated MSCs during  
234 adipogenesis. Heterochromatin markers H3K9me3, H3K27me3 and the euchromatin  
235 marker H3K4me3 were measured in Sun1/2-depleted MSCs via western blots under  
236 both GM and AM conditions (**Fig. 7a**). Comparing siCntl and siSun counterparts, siSun  
237 treatment increased H3K9me3 levels by 56% and by 86% in the AM and GM groups,  
238 respectively ( $P < 0.05$ , **Fig. 7b**). Shown in **Fig. 7c** siSun group also showed a 48%  
239 decrease of H3K27me3 in the AM groups ( $P < 0.05$ ,) but no H3K27me3 changes were  
240 detected in GM groups ( $P = 0.37$ ). No changes were detected in the euchromatin  
241 marker H3K4me3 had between siSun and siCntl treated cells under GM and AM  
242 conditions (**Fig. 7d**).

243  
244 To further investigate the increased H3K9me3 levels, confocal images of H3K9me3  
245 (green) and DNA (blue) were quantified for both siSun and siCntl groups under either  
246 GM (**Fig. 7e**) and AM conditions (**Fig. 7h**). Shown in, siSun treatment increased  
247 H3K9me3 foci count per cell by 9% ( $P < 0.01$ , **Fig. 7f**) and foci area by 7% ( $P < 0.001$ ,  
248 **Fig. 7g**) under GM conditions. Comparing siSun and siCntl groups under AM  
249 conditions, siSun treatment increased H3K9me3 foci count per cell by 43% ( $P < 0.0001$ ,  
250 **Fig. 7i**) while foci area remained unchanged (**Fig. 7j**). To detect any increased  
251 H3K9me3 enrichment on adipogenesis marker gene Adipoq, we next performed  
252 CUT&RUN extraction targeting H3K9me3 on siSun and siCntl treatment groups under  
253 AM conditions. Shown in **Fig. 7k**, H3K9me3 enrichment on Adipoq was increased by  
254 156% in the siSun AM group compared to the siCntl AM group ( $P < 0.05$ ).

255

256 *H3K9me3 Levels and Enrichment at the Adipogenic Gene Adipoq Remains Unaltered*

257 *During dnKASH Disruption of the LINC Complex*

258 Investigating the increased adipogenesis of dnKASH expressing MSCs,

259 heterochromatin markers H3K9me3, H3K27me3 and euchromatin marker H3K4me3

260 were measured under both GM and AM conditions (**Fig. 8a**). Contrasting to Sun1/2

261 depletion, western blot analysis showed a 51% decrease of H3K9me3 in the +Dox

262 group under AM conditions ( $P < 0.01$ , **Fig. 8b**). Similar to siSun, AM+Dox treated

263 dnKASH expressing MSCs decreased H3K27me3 by 56% ( $P < 0.05$ , **Fig. 8c**).

264 H3K9me3 and H3K27me3 had no significant changes under GM conditions while no

265 significant H3K4me3 differences were detected (**Fig. 8d**).

266

267 Confocal imaging of H3K9me3 (green) and DNA (Blue) during growth in GM (**Fig. 8e**)

268 and AM (**Fig. 8h**) revealed 5% increase of H3K9me3 foci area between GM+Dox GM

269 samples ( $P < 0.05$ , **Figs. 8g**) and a 7% decrease in the AM+Dox samples compared to

270 AM samples ( $P < 0.01$ , **Figs. 8j**). No significant H3K9me3 foci count per cell changes

271 were detected (**Figs. 8f & i**). Further, H3K9me3 enrichment on Adipoq was not altered

272 between AM+Dox and AM groups (**Fig. 8k**).

273

## 274 **Discussion**

275 While the depletion of Sun proteins and expression of dnKASH isoforms both result in

276 functional nucleo-cytoskeletal disconnection, independent and potentially confounding

277 effects of the Sun1/2 proteins on differentiation and chromatin organization were



278 unknown. Here we show that while disabling LINC function via a dominant negative  
279 expression of KASH domain (i.e. dnKASH) biases MSC differentiation towards  
280 adipogenesis, depleting Sun1/2 proteins has an opposite effect and inhibits adipogenic  
281 differentiation as shown through western blot analysis, RNA-seq analysis, and lipid  
282 droplet counts. We further report that depletion of Sun1/2 results in increased H3K9me3  
283 accrual at both global and gene scales. Interestingly, dnKASH treatment has no such  
284 effect. Therefore, our finding suggests that Sun proteins may direct internal nuclear  
285 functions independent of LINC complex function and these two methods cannot be used  
286 interchangeably in studying LINC function.

287

288 Previous studies have shown that depletion of Sun1/2 reduces tethering of  
289 chromosomes to the nuclear envelope<sup>31,39,40</sup>, alters nucleolus morphology<sup>41</sup>, and  
290 increases trimethylated K9 histone (H3K9me3) levels in hTERT-RPE1 and MCF10A  
291 cells<sup>42</sup>. Our results show similar trends as Sun1/2 depletion in MSCs increased both  
292 H3K9me3 protein levels and number of H3K9me3 heterochromatic foci while no  
293 H3K9me3 protein levels or foci number increases were observed under dnKASH  
294 expression. Further, we report that depleting Sun1/2 proteins at the inner nuclear  
295 envelope increases H3K9me3 heterochromatin formation on the adipogenic gene  
296 *Adipoq* in MSCs and that dnKASH expression does not alter H3K9me3 enrichment on  
297 *Adipoq*. These results reveal that Sun1/2 proteins regulates H3K9me3 heterochromatin  
298 organization independent of the LINC complex. Additionally, this observed increase of  
299 the H3K9me3, a constitutive form of heterochromatin, marks a strong response from the  
300 nucleus, indicating a potential mechanism by which adipogenesis is inhibited during

301 depletion of Sun1/2. As a constitutive heterochromatin form, H3K9me3 forms  
302 constitutive heterochromatin that is tightly bound to DNA<sup>43-45</sup>, and is not easily removed.  
303 H3K27me3, on the other hand, is a facultative heterochromatin marker that is more  
304 easily modulated for differentiation<sup>45-47</sup>. The observed lack of H3K9me3 increase along  
305 with the corresponding decrease of H3K27me3 during dnKASH expression indicates  
306 that decoupling the LINC complex via dnKASH does not increase heterochromatin  
307 formation in MSCs. As observed in other studies, decreased heterochromatin,  
308 especially H3K27me3, is associated with increased adipogenesis. Decreases in  
309 H3K27me3 and its methyltransferase EZH2 corresponds with increased adipogenesis in  
310 MSCs<sup>36</sup> which EZH2 expression is directly regulated by the mechanosensitive, LINC  
311 complex regulated<sup>24</sup> biomolecule  $\beta$ -Catenin<sup>36</sup>. Therefore, our observed decreases of  
312 H3K27me3 during dnKASH expression with no increase in H3K9me3 may provide a  
313 mechanism by which acceleration of adipogenesis in MSCs occurs.

314  
315 In our study we also found a tumorigenic and osteolytic effect from Sun1/2 depletion.  
316 During Sun1/2 depletion increases in the tumorigenic and osteolytic factors *Cxcl10*,  
317 *Cxcl1*, and *Cxcl5* were observed (Table S1). Increases in these markers are associated  
318 with increased cancer metastasis in breast cancer<sup>48</sup> and prostate cancer<sup>49</sup>. Additionally,  
319 increases of *Cxcl10*, *Cxcl5* and *Cxcl1*<sup>49</sup> recruit cancer cell metastasis to bone<sup>49-51</sup>,  
320 induce osteoclast differentiation<sup>50,52</sup> and angiogenesis<sup>53</sup>. Importantly, osteolysis has a  
321 direct relationship with tumorigenesis. For metastasis of cancer to occur cancer must be  
322 able to migrate out of bone or into bone<sup>54</sup>. Thus, osteoclasts are needed to degrade the  
323 bone matrix. Depletion of Sun1/2 leads to an upregulation of *Cxcl10*, *Cxcl5*, and *Cxcl1*,

324 However, dnKASH expression during adipogenesis saw these same genes down  
325 regulated (Table S4) indicating a reduction in the osteolytic signaling. While the  
326 underlying mechanism for these observed differences between Sun1/2 and dnKASH  
327 are unknown, these results indicate that regulation of these proto-oncogenes and the  
328 resulting osteolytic signaling is dependent upon Sun1/2 mediated connection to the  
329 internal nucleus.

330

331 This work supports previous observations<sup>24,55,56</sup> that inhibiting the LINC complex via  
332 siSun and dnKASH expression reduces overall nuclear structural integrity as indicated  
333 by reduced nuclear circularity or aspect ratio. Our observed increase in nuclear area  
334 and perimeter seen during Sun1/2 depletion is similar to that of our previous  
335 observations of nuclear morphology changes during Lamin A/C depletion<sup>57</sup>. Both  
336 Sun1/2 and Lamin A/C are important inner nuclear membrane nucleoskeleton elements  
337 that associate with other structural proteins and elements such as chromatin. Previous  
338 research has shown that during both depletion of Lamin A/C and Nesprin-Sun1  
339 association inhibition Sun1 via Sun1-KDEL expression have large deformations during  
340 micropipette direct force application, indicating a softer nuclei<sup>34</sup>. However, during  
341 dnKASH expression deformation of the nucleus is reduced but nucleus displacement is  
342 not recovered after removal of micropipette force<sup>34</sup>. Thus, showing that dnKASH  
343 expression does not significantly reduce nuclear stiffness and nuclear morphology  
344 similar to that of internuclear proteins such as Sun1/2 and Lamin A/C. Chromatin does  
345 provide structural functions in the nucleus forces during low mechanical load<sup>58,59</sup> and  
346 increasing heterochromatin formation has been shown to partially alter nuclear

347 morphology<sup>59</sup>. However, we have previously shown that depletion of Sun1/2 causes a  
348 reduction in nuclear stiffness and increased chromatin area size<sup>33</sup>. Thus, our data in  
349 combination with previous work indicates that depletion of Sun1/2 is potentially able to  
350 alter nuclear integrity independent of chromatin condensation. Additionally, our results  
351 indicate that the dnKASH expression effects on nuclear integrity is similar to other  
352 studies as seen by a reduction in nuclear area<sup>24,55,56</sup>, indicating dnKASH regulates  
353 nuclear morphology and function without reducing nuclear stiffness.

354

355 In conclusion, this work reveals new insight into the role of Sun1/2 proteins in the  
356 nuclear interior and its effects on the nuclear functions of differentiation and chromatin  
357 organization. Depletion of Sun1/2 not only inhibited adipogenesis, but promoted  
358 osteolytic and tumorigenic signaling. Chromatin organization was also altered,  
359 increasing H3K9me3 heterochromatin. Our findings show that these effects are  
360 independent of the LINC complex function. These results have potential impacts on our  
361 understanding of how envelopathies targeting the nuclear envelope, such as Emery-  
362 Driufus muscular dystrophy (EDMD) and Progeria, become more severe during  
363 mutations in Sun1<sup>60</sup>. Which, as shown here, may be cause by the misregulation of  
364 chromatin organization and differentiation regulation during Sun1/2 depletion. Thus,  
365 these results expand our understandings of the important role inner nuclear membrane  
366 proteins have in regulating proper nuclear functions and ultimately human health.

367

368

369

370

## 371 **Materials and Methods**

### 372 *MSCs Isolation*

373 Bone marrow derived MSCs (mdMSC) from 8-10 wk male C57BL/6 mice were isolated  
374 as described<sup>57,61</sup> from multiple mouse donors and MSCs pooled, providing a  
375 heterogenous MSCs cell line. Briefly, tibial and femoral marrow were collected in RPMI-  
376 1640, 9% FBS, 9% HS, 100 µg/ml pen/strep and 12µM L-glutamine. After 24 hours,  
377 non-adherent cells were removed by washing with phosphate-buffered saline and  
378 adherent cells cultured for 4 weeks. Passage 1 cells were collected after incubation with  
379 0.25% trypsin/1 mM EDTA × 2 minutes, and re-plated in a single 175-cm<sup>2</sup> flask. After 1-  
380 2 weeks, passage 2 cells were re-plated at 50 cells/cm<sup>2</sup> in expansion medium (Iscove  
381 modified Dulbecco's, 9% FBS, 9% HS, antibiotics, L-glutamine). mdMSC were re-plated  
382 every 1-2 weeks for two consecutive passages up to passage 5 and tested for  
383 osteogenic and adipogenic potential, and subsequently frozen.

384

### 385 *Stable dnKASH Cell Line*

386 MSCs were stably transduced with a doxycycline inducible plasmid expressing an  
387 mCherry tagged dominant-negative KASH domain. dnKASH plasmid was lentiviral  
388 packaged as a generous gift from Dr. Daniel Conway. Vector map found here:  
389 <https://www.addgene.org/125554/>. Lentivirus supernatant was added to growth media  
390 with polybrene (5 µg/ml). Lentivirus growth media mixture was added to 50-70%  
391 confluent MSCs. Lentivirus media was replaced 48 hours later with selection media  
392 containing G418 (1mg/ml) for 5 days to select stably infected dnKASH-MSCs.

393

394 *Cell Culture, Pharmacological Reagents, and Antibodies*

395 Fetal calf serum (FCS) was obtained from Atlanta Biologicals (Atlanta, GA). MSCs were  
396 maintained in IMDM with FBS (10%, v/v) and penicillin/streptomycin (100µg/ml). For  
397 immunostaining experiments, seeding cell density was 3,000 cells per square  
398 centimeter. For adipogenic differentiation experiments, the seeding cell density was  
399 10,000 cells per square centimeter. Cells were either grown in growth media (GM) or  
400 adipogenic media (AM) Cells were transfected 24 hours after cell seeding with siRNA  
401 targeting Sun1 and Sun2 (siSun) or a control sequence (siCntl) using RNAiMax from  
402 Invitrogen. Adipogenic media was placed on siRNA treated cells twenty four hours after  
403 the transfection, the adipogenic media was added which contained dexamethasone  
404 (0.1µM), insulin (5 µg/ml), and indomethacin (1 µg/ml) for 5 days. For dnKASH cells,  
405 cells were seeded at 10,000 cells per square centimeter. Twenty four hours after  
406 seeding, dnKASH cells were given growth media containing doxycycline (1 µg/ml).  
407 Adipogenic media containing dexamethasone (0.1µM), insulin (5 µg/ml), indomethacin  
408 (1 µg/ml), and doxycycline (1 µg/ml) (AM+Dox) or growth media (GM+Dox) was placed  
409 on dnKASH cells twenty four hours after adding initial doxycycline. Control cells were  
410 grown in growth media (GM) or adipogenic media (AM) without doxycycline. Growth  
411 media or adipogenic media with or without fresh doxycycline were changed every 48  
412 hours.

413

414 *siRNA Silencing Sequences*

415 For transient silencing of MSCs, cells were transfected with gene-specific small  
416 interfering RNA (siRNA) or control siRNA (20 nM) using RNAiMax (ThermoFisher)  
417 according to manufacturer's instructions. The following Stealth Select siRNAs  
418 (Invitrogen) were used in this study: SUN1 (ThermoFischer Scientific, Assay ID  
419 #s94913), SUN2 (ThermoFischer Scientific, Assay ID s104591).

420

#### 421 *qPCR*

422 2ul of each CUT&RUN sample was run in 20ul reaction following Bio-Rad protocols  
423 targeting Adipoq (Bio-Rad, 10025636). Briefly, 20ul reactions were made using  
424 SsoAdvanced Master Mix (Bio-Rad, 1725270). Reactions were then run at 95°C for two  
425 minutes. Then samples were heated at 95°C for 15 seconds then cooled to 60°C for 30  
426 seconds which both steps were repeated for 40 cycles. Finally, samples were run at  
427 60°C for two minutes. Samples were then analyzed for percent of input sample for  
428 CUT&RUN-qPCR.

429

#### 430 *RNA-seq*

431 Five days after adipogenic treatment, following the above protocols, total RNA was  
432 extracted using RNAeasy (Qiagen) for three samples per group. Total RNA samples  
433 were sent to Novogene for mRNA sequencing and analysis. Briefly, index of the  
434 reference genome was built using Hisat2 v2.0.5 and paired-end clean 2 reads were  
435 aligned to the reference genome using Hisat2 v2.0.5. featureCounts v1.5.0-p3 was used  
436 to count the reads numbers mapped to each gene. And then FPKM of each gene was  
437 calculated based on the length of the gene and reads count mapped to this gene.

438 FPKM, expected number of Fragments Per Kilobase of transcript sequence per Millions  
439 base pairs sequenced. Differential expression analysis was performed using the  
440 DESeq2 R package (1.20.0). DESeq2 provides statistical routines for determining  
441 differential expression in digital gene expression data using a model based on the  
442 negative binomial distribution. The resulting P-values were adjusted using the Benjamini  
443 and Hochberg's approach for controlling the false discovery rate. Genes with an  
444 adjusted P-value  $\leq 0.05$  found by DESeq2 were assigned as differentially expressed.  
445 Genes with significant differential gene expression were further analyzed with DAVID<sup>62</sup>  
446 for pathway analysis. Pathways with a FDR  $\leq 0.05$  were selected.

447

#### 448 *Immunofluorescence*

449 Twenty four hours after the siRNA treatment against Sun1/Sun2 or dnKASH expression,  
450 cells were fixed with 4% paraformaldehyde. Cells were permeabilized by incubation  
451 with 0.3% Triton X-100. Cells were incubated in a blocking serum in PBS with 5%  
452 Donkey Serum (017-000-121, Jackson Immuno Research Laboratories). Primary  
453 antibody solution was incubated on the cells for 1h at 37°C, followed by secondary  
454 antibody incubation of either Alexa Fluor 594 goat anti-rabbit (Invitrogen), Alexa Fluor  
455 488 goat anti-mouse (Invitrogen), Alexa Fluor 488 chicken anti-rabbit (Invitrogen), or  
456 Alexa fluor 594 Donkey anti-mouse (Invitrogen). For nuclear staining cells were  
457 incubated with NucBlue Hoechst stain (Fisher Scientific). Primary and secondary  
458 concentrations were both 1:300 by volume.

459

#### 460 *Image Analysis*



461 Five days after adding adipogenic media, cells were fixed and stained with Lipid Spot  
462 488 (Biotium, #70069), and NucBlue Hoechst stain. Images were taken using 20x  
463 objective and were exported to quantify lipid droplet formation via a custom-made  
464 MATLAB program (The MathWorks, Natick, MA), previously published<sup>15,57</sup>. The  
465 minimum pixel intensity of 80 was used to isolate lipid droplet staining. The mean lipid  
466 droplet intensity per cell was calculated by dividing the sum of lipid droplet stain  
467 intensity by the nuclei count per image. Exported images were used to quantify lipid  
468 droplet formation, Sun1, Sun2, mCherry, nuclear area, nuclear perimeter, and nuclear  
469 circularity via the custom-made MATLAB program previously published<sup>57</sup>. Cell Profiler  
470 (<https://cellprofiler.org/>) was used to count the number of H3K9me3 foci per cell and foci  
471 area.

472

### 473 *Western Blotting*

474 Whole cell lysates were prepared using radio immunoprecipitation assay (RIPA) lysis  
475 buffer (150mM NaCl, 50mM Tris HCl, 1mM EDTA, 0.24% sodium deoxycholate, 1%  
476 Igepal, pH 7.5) to protect the samples from protein degradation NaF (25mM), Na<sub>3</sub>VO<sub>4</sub>  
477 (2mM), aprotinin, leupeptin, pepstatin, and phenylmethylsulfonylfluoride (PMSF) were  
478 added to the lysis buffer. Western protein amounts were normalized to 15µg through  
479 BCA Protein Assay (Thermo Scientific, #23225). Whole cell lysates (20µg) were  
480 separated on 10% poly-acrylamide gels and transferred to polyvinylidene difluoride  
481 (PVDF) membranes. Membranes were blocked with milk (5%, w/v) diluted in Tris-  
482 buffered saline containing Tween20 (TBS-T, 0.05%). Blots were then incubated  
483 overnight at 4°C with appropriate primary antibodies. Following primary antibody

484 incubation, blots were washed and incubated with horseradish peroxidase-conjugated  
485 secondary antibody diluted at 1: 5,000 (Cell Signaling) at RT for 1h in 5% milk in TBST-  
486 T. Chemiluminescence was detected with ECL plus (Amersham Biosciences,  
487 Piscataway, NJ). At least three separate experiments were used for densitometry  
488 analyses of western blots and densitometry was performed via NIH ImageJ software.

489

#### 490 *CUT&RUN*

491 CUT&RUN was performed using the CUT&RUN Assay Kit (Cell Signaling #86652).  
492 Briefly, cells were harvested and centrifuged, washed, and bound to Concanavalin A-  
493 coated magnetic beads. Cells were then permeabilized with digitonin and incubated with  
494 primary antibody at 4°C for two hours. Cells were then washed and resuspended with  
495 pAG-MNase enzyme and incubated at 4°C for one hour. Cells were then incubated at  
496 37°C for 10 minutes to elute DNA into solution. Solution was then extracted and purified  
497 using DNA Purification Buffers and Spin Columns (ChIP, CUT&RUN, Cell Signaling  
498 #14209). DNA samples were then used for qPCR or sequencing.

499

#### 500 Statistical Analysis and Reproducibility

501 Results for densitometry were presented as mean  $\pm$  SEM. Densitometry and other  
502 analyses were performed on at least three separate experiments. Differences between  
503 groups were identified by One-Way Anova. Analysis of nuclear morphology histone  
504 modifications were done using Whitney-Mann test and results were presented as mean  
505  $\pm$  STD. Differential gene expression analysis via DESEQ2 was done using Wald test. P-  
506 values of less than 0.05 were considered significant. Lipid image analysis groups were

507 analyzed via the Kruskal-Wallis test. CUT&RUN-qPCR was analyzed via One-Tailed  
508 Students T-Test. All experiments were conducted in triplicate to assure reproducibility.

509

### 510 **Data Availability**

511 RNA-Seq data that support the findings of this study have been deposited in GEO with  
512 the accession codes GSE193505.

513

### 514 **Acknowledgements**

515 This study was supported by AG059923, P20GM109095, NSF1929188 and, NSF 2025505

516

### 517 **Competing interests**

518 The author(s) declare no competing interests financial or otherwise.

519

### 520 **Contributions**

521 Matthew Goelzer: concept/design, data analysis/interpretation, manuscript writing

522 Sean Howard: data analysis, final approval of manuscript

523 Anamaria Zavala: data analysis/interpretation, final approval of manuscript

524 Daniel Conway: concept/design, final approval of manuscript

525 Andre J van Wijnen: concept/design, data analysis/interpretation, final approval of manuscript

526 Gunes Uzer: concept/design, data analysis/interpretation, financial support, manuscript writing,  
527 final approval of manuscript

528

529 **Figure 1. Sun1/2 Depletion Alters Nuclear Morphology. a** Representative images of

530 MSCs treated with siRNA targeting Sun1/2 (siSun) which were stained for Sun1 (green),

531 Sun2 (red), and DNA (blue). **b** siSun treated cells had 47% decrease of Sun1 intensity (n

532 = 1478,  $P < 0.0001$ ). **c** Sun2 intensity levels were decreased by 52% in siSun treated  
533 cells ( $n = 1478$ ,  $P < 0.0001$ ). **d** MSCs treated with siSun had an increase in nuclear area  
534 by 7% ( $n = 1478$ ,  $p < 0.01$ ). **e** Nucleus perimeter decreased in siSun treated MSCs by  
535 8% ( $n = 1478$ ,  $p < 0.0001$ ). **f** Nuclear circularity decreased by 9% in siSun treated cells ( $n$   
536 = 1478,  $p < 0.001$ ). Comparisons were made against control using non-parametric Mann-  
537 Whitney Test where \*  $P < 0.05$ , \*\*  $P < 0.01$ , \*\*\*  $P < 0.001$ , \*\*\*\*  $P < 0.0001$ . Scale bar  
538 represents 50 $\mu$ m.

539

540 **Figure 2. Dominant-Negative KASH Disruption of the LINC Complex Reduces**

541 **Nuclear Area.** **a** Representative photos of doxycycline induced DNKASH cells. Images

542 show DNKASH tagged with mCherry (Red) and DNA (Blue). **b** mCherry intensity levels

543 increased by 133% in doxycycline treated MSCs ( $n = 5332$ ,  $P < 0.0001$ ). **c** Doxycycline

544 treated MSCs experienced a 14% decrease of nuclear area ( $n = 5322$ ,  $p < 0.001$ ). **d** Nuclear

545 perimeter had a slight decrease of 1% in doxycycline treatment group ( $n = 5322$ ,  $P <$

546  $0.05$ ). **e** Nuclear circularity decreased 6% in the doxycycline treatment group ( $n = 5322$ ,

547  $P < 0.0001$ ). Comparisons were made against control using non-parametric Mann-

548 Whitney Test where \*  $P < 0.05$ , \*\*  $P < 0.01$ , \*\*\*  $P < 0.001$ , \*\*\*\*  $P < 0.0001$ . Scale bar

549 represents 50 $\mu$ m.

550

551 **Figure 3: Depletion of Sun1/2 Inhibits Adipogenesis.** **a** Western analysis of

552 adipogenesis markers Adipoq, Cebpa, and Pparg in growth media and adipogenic media

553 during siSun and siCntl treatment. **b** Analysis of Adipoq protein levels. Comparison of

554 adipogenic siSun and siCntl groups showed a 92% reduction of Adipoq ( $n = 3$ ,  $P < 0.01$ ).

555 **c** Cebpa experienced a non-significant reduction of 38% in protein levels in siSun cells  
556 compared to siCntl cells during adipogenesis (n = 3, p = 0.22). **d** Pparg levels decreased  
557 by 58% in adipogenic siSun compared to siCntl (n = 3, P < 0.001). **e** Representative  
558 images of lipid droplet florescence images where MSCs are stained for lipid droplets  
559 (green) and DNA (blue). **f** Quantification of the mean florescent lipid droplet intensity per  
560 cell from individual imaging fields shows a significant reduction of 83% in lipid droplet  
561 amounts in adipogenic siSun treatment compared to siCntl (n = 50, P < 0.0001). Western  
562 analysis group comparisons were One-Way Anova. Lipid droplet intenisty group  
563 comparisons were made using Kruskal-Wallis test. \* P < 0.05, \*\* P < 0.01, \*\*\* P < 0.001,  
564 \*\*\*\* P < 0.0001. Scale bar represents 50µm.

565

566 **Figure 4: dnKASH Expression Induces Accelerated Adipogenesis in MSCs. a**  
567 Representative western images of doxycycline induced dnKASH cells and control cells  
568 grown in growth media and adipogenic media. **b** During adipogenesis doxycycline treated  
569 samples had 98% increased levels of Adipoq (n = 3, P < 0.01). **c** Pparg in doxycycline  
570 treatment group during adipogenesis increased by 90% (n = 3, P < 0.05). **d** Cebpa  
571 experienced an increase of 27% but was not significant during adipogenesis in  
572 doxycycline treatment (n = 3, p = 0.38). Representative photos of lipid droplets (green)  
573 and DNA (blue). **f** Quantification of mean lipid droplet intensity per cell in each field of  
574 view showed an increase of lipid droplet amounts in doxycycline treated cells by 258% (n  
575 = 50, P < 0.05) during adipogenesis. Western analysis group comparisons were One-Way  
576 Anova. Lipid Droplet Intensity group comparisons were made using Kruskal-Wallis test. \*  
577 P < 0.05, \*\* P < 0.01, \*\*\* P < 0.001, \*\*\*\* P < 0.0001. Scale bar represents 50µm.

578

579 **Figure 5: Sun1/2 Depletion Decreases Adipogenesis and Lipid Metabolism Related**

580 **Genes. a** Heatmap of genes with significant differential (FC > 1 and P < 0.05) gene  
581 expression during Sun1/2 depletion (n = 24). **b** Principle component plot where principal  
582 component 1 and principal component 2 explain 19.9% and 16.2% of the total variance,  
583 respectively. Prediction ellipses indicate that with a probability of 0.95, a new observation  
584 from the same group will fall inside the ellipse. n = 24 data points. **c** DAVID analysis of  
585 genes up regulated in siSun treatment compared to siCntl. Pathways selected have FDR  
586 < 0.05. **d** DAVID analysis of genes down regulated in siSun group compared to siCntl.  
587 Pathways selected have FDR < 0.05. Blue indicates pathways related to adipogenesis  
588 and lipid metabolism. **e** FPKM values for adipogenic and lipid metabolism related genes  
589 detected in both differential gene expression (FC > 1, P < 0.05) and in DAVID analysis  
590 (FDR < 0.05) (n = 3/grp). Group comparison was made using One-Way ANOVA where \*  
591 P < 0.05.

592

593 **Figure 6: Dominant-Negative KASH Expression Upregulates Adipogenesis Related**

594 **Pathways. a** Heatmap of genes with significant differential (FC > 1 and P < 0.05) gene  
595 expression during doxycycline induced dnKASH expression (n = 24). **b** Principle  
596 component plot where principal component 1 and principal component 2 explain 25.2%  
597 and 16.9% of the total variance, respectively. Prediction ellipses indicate that with a  
598 probability of 0.95, a new observation from the same group will fall inside the ellipse. n =  
599 24 data points. **c** DAVID analysis of genes up regulated in doxycycline treatment  
600 compared to control. Blue indicates pathways related to adipogenesis and lipid

601 metabolism. Pathways selected have FDR < 0.05. **d** DAVID analysis of genes down  
602 regulated in doxycycline group compared to control. Pathways selected have FDR < 0.05.  
603 **e** FPKM values for adipogenic and lipid metabolism related genes detected in both  
604 differential gene expression (FC > 1, P < 0.05) and in DAVID analysis (FDR < 0.05) (n =  
605 3/grp). Group comparison was made using One-Way ANOVA. \* P < 0.05, \*\* P < 0.01.

606

607

608 **Figure 7: Global levels of H3K9me3 and Enrichment on Adipoq increases during**  
609 **Sun1/2 depletion.** **a** Representative western images of heterochromatin markers  
610 H3K9me3 and H3K27me3 and euchromatin marker H3K4me3 in siSun and siCntl  
611 treatments during growth in growth media and adipogenic media. **b** Western analysis of  
612 heterochromatin marker H3K9me3 revealed an increase of 56% in siSun cells compared  
613 to siCntl during adipogenesis (n = 3, P < 0.05). **c** H3K27me3 had a decrease of 48% in  
614 siSun cells compared to siCntl cells during adipogenesis (n =3, P < 0.05). **d** Euchromatin  
615 marker H3K4me3 experienced no significant changes in global protein levels between  
616 siSun and siCntl-treated cells during adipogenesis. **e** Representative images of siCntl and  
617 siSun-treated cells grown in growth media staining for H3K9me3 (green) and Hoescht  
618 (blue). **f** H3K9me3 foci count per cell in siSun cells compared to siCntl cells in growth  
619 media increased by 9% (n = 338, P < 0.01). **g** H3K9me3 foci area increased by 7% in  
620 siSun cells compared to siCntl in growth media (n = 14560, P < 0.001). **h** Representative  
621 images of siSun and siCntl-treated cells grown in adipogenic media and stained for  
622 H3K9me3 (green) and Hoechst (blue). **i** H3K9me3 foci count per cell in siSun cell  
623 compared to Sicntl Cells during adipogenesis increased by 43% (n = 213, P < 0.0001). **j**

624 No detectable increase of H3K9me3 foci area was found in siSun cells during  
625 adipogenesis (n = 8460). **k** CUR&RUN-qPCR targeting H3K9me3 localization on Adipoq  
626 showed an increase of 156% in siSun cells compared to siCntl (n = 3, P < 0.05). Western  
627 analysis group comparisons were One-Way Anova. H3K9me3 Foci count and area  
628 comparisons were made using Mann-Whitney Test. CUR&RUN-qPCR comparisons were  
629 done using One-Tailed Students T-Test. \* P < 0.05, \*\* P < 0.01, \*\*\* P < 0.001, \*\*\*\* P <  
630 0.0001. Scale bar represents 25µm.

631

632 **Figure 8: H3K9me3 Levels Are Unaltered During dnKASH Disruption of the LINC**  
633 **Complex.** **a** Representative images of doxycycline-induced dnKASH expression of  
634 heterochromatin markers H3K9me3 and H3K27me3 and euchromatin marker. **b**  
635 H3K9me3 levels decreased during adipogenesis in the doxycycline treatment group  
636 compared to controls by 51% (n = 3, P < 0.01). **c** H3K27me3 levels decreased by 56% in  
637 the doxycycline treatment group compared to control during adipogenesis (n = 3, P <  
638 0.05). **d** H3K4me3 levels had no significant changes in doxycycline. **e** Representative  
639 confocal imaging of H3K9me3 (green) and DNA (Blue) in growth media. **f** Analysis of  
640 H3K9me3 foci count per cell in the doxycycline treatment group in growth media showed  
641 no significant changes in foci count per cell (n= 246). **g** H3K9me3 foci area increased by  
642 5% in the doxycycline treatment group in growth media (n = 7350, P < 0.05). **h**  
643 Representative images of doxycycline-treated cells and controls cells stained for  
644 H3K9me3 (green) and Hoescht (blue) during growth in adipogenic media. **i** H3K9me3 foci  
645 count per cell did not show significant changes between the doxycycline treatment group  
646 and the control group during growth in adipogenic media (n = 328). **j** The doxycycline



647 treatment group had decreased H3k9me3 foci area during adipogenesis by 7% compared  
648 to control (n = 11317, P < 0.01). **k** CUR&RUN-qPCR targeting H3K9me3 localization on  
649 Adipoq showed no significant increase in doxycyclinetreated cells compared to controls  
650 (n = 3). Western analysis group comparisons were One-Way Anova. H3K9me3 Foci count  
651 and area comparisons were made using Mann-Whitney Test. CUR&RUN-qPCR  
652 comparisons were done using One-Tailed Students T-Test. \* P < 0.05, \*\* P < 0.01, \*\*\* P  
653 < 0.001, \*\*\*\* P < 0.0001. Scale bar represents 25µm.

654

## 655 **References**

- 656 1 Zhang, Q. *et al.* Nesprins: a novel family of spectrin-repeat-containing proteins  
657 that localize to the nuclear membrane in multiple tissues. *J Cell Sci* **114**, 4485-  
658 4498 (2001).
- 659 2 Bouzid, T. *et al.* The LINC complex, mechanotransduction, and mesenchymal  
660 stem cell function and fate. *J Biol Eng* **13**, 68, doi:10.1186/s13036-019-0197-9  
661 (2019).
- 662 3 Mellad, J. A., Warren, D. T. & Shanahan, C. M. Nesprins LINC the nucleus and  
663 cytoskeleton. *Curr Opin Cell Biol* **23**, 47-54, doi:10.1016/j.ceb.2010.11.006  
664 (2011).
- 665 4 Wilhelmsen, K. *et al.* Nesprin-3, a novel outer nuclear membrane protein,  
666 associates with the cytoskeletal linker protein plectin. *J Cell Biol* **171**, 799-810,  
667 doi:10.1083/jcb.200506083 (2005).

- 668 5 Cruz, V. E., Esra Demircioglu, F. & Schwartz, T. U. Structural Analysis of  
669 Different LINC Complexes Reveals Distinct Binding Modes. *Journal of molecular*  
670 *biology* **432**, 6028-6041, doi:10.1016/j.jmb.2020.09.019 (2020).
- 671 6 Crisp, M. *et al.* Coupling of the nucleus and cytoplasm: role of the LINC complex.  
672 *The Journal of Cell Biology* **172**, 41-53, doi:10.1083/jcb.200509124 (2006).
- 673 7 Haque, F. *et al.* SUN1 interacts with nuclear lamin A and cytoplasmic nesprins to  
674 provide a physical connection between the nuclear lamina and the cytoskeleton.  
675 *Mol Cell Biol* **26**, 3738-3751, doi:10.1128/MCB.26.10.3738-3751.2006 (2006).
- 676 8 Liu, Q. *et al.* Functional association of Sun1 with nuclear pore complexes. *J Cell*  
677 *Biol* **178**, 785-798, doi:10.1083/jcb.200704108 (2007).
- 678 9 Lottersberger, F., Karssemeijer, R. A., Dimitrova, N. & de Lange, T. 53BP1 and  
679 the LINC Complex Promote Microtubule-Dependent DSB Mobility and DNA  
680 Repair. *Cell* **163**, 880-893, doi:10.1016/j.cell.2015.09.057 (2015).
- 681 10 Shibuya, H. *et al.* MAJIN Links Telomeric DNA to the Nuclear Membrane by  
682 Exchanging Telomere Cap. *Cell* **163**, 1252-1266, doi:10.1016/j.cell.2015.10.030  
683 (2015).
- 684 11 Shibuya, H., Ishiguro, K. & Watanabe, Y. The TRF1-binding protein TERB1  
685 promotes chromosome movement and telomere rigidity in meiosis. *Nature cell*  
686 *biology* **16**, 145-156, doi:10.1038/ncb2896 (2014).
- 687 12 Killaars, A. R., Walker, C. J. & Anseth, K. S. Nuclear mechanosensing controls  
688 MSC osteogenic potential through HDAC epigenetic remodeling. *Proc Natl Acad*  
689 *Sci U S A* **117**, 21258-21266, doi:10.1073/pnas.2006765117 (2020).

- 690 13 Uzer, G. *et al.* Cell Mechanosensitivity to Extremely Low-Magnitude Signals Is  
691 Enabled by a LINCed Nucleus. *Stem Cells* **33**, 2063-2076,  
692 doi:10.1002/stem.2004 (2015).
- 693 14 Déjardin, T. *et al.* Nesprins are mechanotransducers that discriminate epithelial-  
694 mesenchymal transition programs. *J Cell Biol* **219**, doi:10.1083/jcb.201908036  
695 (2020).
- 696 15 Thompson, M., Woods, K., Newberg, J., Oxford, J. T. & Uzer, G. Low-intensity  
697 vibration restores nuclear YAP levels and acute YAP nuclear shuttling in  
698 mesenchymal stem cells subjected to simulated microgravity. *NPJ microgravity*  
699 **6**, 35, doi:10.1038/s41526-020-00125-5 (2020).
- 700 16 Benham-Pyle, B. W., Pruitt, B. L. & Nelson, W. J. Cell adhesion. Mechanical  
701 strain induces E-cadherin-dependent Yap1 and beta-catenin activation to drive  
702 cell cycle entry. *Science (New York, N.Y.)* **348**, 1024-1027,  
703 doi:10.1126/science.aaa4559 (2015).
- 704 17 Shen, X. *et al.* YAP promotes the proliferation of neuroblastoma cells through  
705 decreasing the nuclear location of p27(Kip1) mediated by Akt. *Cell Prolif* **53**,  
706 e12734, doi:10.1111/cpr.12734 (2020).
- 707 18 Sen, B. *et al.*  $\beta$ -Catenin Preserves the Stem State of Murine Bone Marrow  
708 Stromal Cells Through Activation of EZH2. *Journal of bone and mineral research*  
709 : the official journal of the American Society for Bone and Mineral Research,  
710 10.1002/jbmr.3975, doi:10.1002/jbmr.3975 (2020).

- 711 19 Lorthongpanich, C. *et al.* YAP as a key regulator of adipo-osteogenic  
712 differentiation in human MSCs. *Stem Cell Res Ther* **10**, 402, doi:10.1186/s13287-  
713 019-1494-4 (2019).
- 714 20 Pan, J. X. *et al.* YAP promotes osteogenesis and suppresses adipogenic  
715 differentiation by regulating beta-catenin signaling. *Bone research* **6**, 18,  
716 doi:10.1038/s41413-018-0018-7 (2018).
- 717 21 Sen, B. *et al.* Mechanical Loading Regulates NFATc1 and  $\beta$ -Catenin Signaling  
718 through a GSK3 $\beta$  Control Node. *Journal of Biological Chemistry* **284**, 34607-  
719 34617, doi:10.1074/jbc.M109.039453 (2009).
- 720 22 Sen, B. *et al.* Mechanical signal influence on mesenchymal stem cell fate is  
721 enhanced by incorporation of refractory periods into the loading regimen. *Journal*  
722 *of biomechanics* **44**, 593-599, doi:10.1016/j.jbiomech.2010.11.022 (2011).
- 723 23 Tajik, A. *et al.* Transcription upregulation via force-induced direct stretching of  
724 chromatin. *Nat Mater* **15**, 1287-1296, doi:10.1038/nmat4729 (2016).
- 725 24 Uzer, G. *et al.* Sun-mediated mechanical LINC between nucleus and  
726 cytoskeleton regulates betacatenin nuclear access. *Journal of biomechanics* **74**,  
727 32-40, doi:10.1016/j.jbiomech.2018.04.013 (2018).
- 728 25 Driscoll, T. P., Cosgrove, B. D., Heo, S. J., Shurden, Z. E. & Mauck, R. L.  
729 Cytoskeletal to Nuclear Strain Transfer Regulates YAP Signaling in  
730 Mesenchymal Stem Cells. *Biophys J* **108**, 2783-2793,  
731 doi:10.1016/j.bpj.2015.05.010 (2015).
- 732 26 Lee, K. K. *et al.* Distinct functional domains in emerin bind lamin A and DNA-  
733 bridging protein BAF. *J Cell Sci* **114**, 4567-4573 (2001).

- 734 27 Caputo, S. *et al.* The carboxyl-terminal nucleoplasmic region of MAN1 exhibits a  
735 DNA binding winged helix domain. *J Biol Chem* **281**, 18208-18215,  
736 doi:10.1074/jbc.M601980200 (2006).
- 737 28 Unnikannan, C. P., Reuveny, A., Grunberg, D. & Volk, T. Recruitment of BAF to  
738 the nuclear envelope couples the LINC complex to endoreplication. *Development*  
739 (*Cambridge, England*) **147**, doi:10.1242/dev.191304 (2020).
- 740 29 Wang, S. *et al.* Mechanotransduction via the LINC complex regulates DNA  
741 replication in myonuclei. *J Cell Biol* **217**, 2005-2018, doi:10.1083/jcb.201708137  
742 (2018).
- 743 30 Salpingidou, G., Smertenko, A., Hausmanowa-Petruciewicz, I., Hussey, P. J. &  
744 Hutchison, C. J. A novel role for the nuclear membrane protein emerin in  
745 association of the centrosome to the outer nuclear membrane. *J Cell Biol* **178**,  
746 897-904, doi:10.1083/jcb.200702026 (2007).
- 747 31 Ding, X. *et al.* SUN1 is required for telomere attachment to nuclear envelope and  
748 gametogenesis in mice. *Dev Cell* **12**, 863-872, doi:10.1016/j.devcel.2007.03.018  
749 (2007).
- 750 32 Zuo, W. *et al.* Stage-resolved Hi-C analyses reveal meiotic chromosome  
751 organizational features influencing homolog alignment. *Nature communications*  
752 **12**, 5827, doi:10.1038/s41467-021-26033-0 (2021).
- 753 33 Newberg, J. *et al.* Isolated nuclei stiffen in response to low intensity vibration. *J*  
754 *Biomech* **111**, 110012, doi:10.1016/j.jbiomech.2020.110012 (2020).
- 755 34 Neelam, S. *et al.* Direct force probe reveals the mechanics of nuclear  
756 homeostasis in the mammalian cell. *Proceedings of the National Academy of*

- 757            *Sciences of the United States of America* **112**, 5720-5725,  
758            doi:10.1073/pnas.1502111112 (2015).
- 759    35    Rubin, J., Styner, M. & Uzer, G. Physical Signals May Affect Mesenchymal Stem  
760            Cell Differentiation via Epigenetic Controls. *Exercise and sport sciences reviews*  
761            **46**, 42-47, doi:10.1249/jes.0000000000000129 (2018).
- 762    36    Sen, B. *et al.*  $\beta$ -Catenin Preserves the Stem State of Murine Bone Marrow  
763            Stromal Cells Through Activation of EZH2. *J Bone Miner Res* **35**, 1149-1162,  
764            doi:10.1002/jbmr.3975 (2020).
- 765    37    Goelzer, M. *et al.* Lamin A/C Is Dispensable to Mechanical Repression of  
766            Adipogenesis. *International Journal of Molecular Sciences* **22**, 6580 (2021).
- 767    38    Lombardi, M. L. *et al.* The interaction between nesprins and sun proteins at the  
768            nuclear envelope is critical for force transmission between the nucleus and  
769            cytoskeleton. *J Biol Chem* **286**, 26743-26753, doi:10.1074/jbc.M111.233700  
770            (2011).
- 771    39    Cain, N. E. *et al.* Conserved SUN-KASH Interfaces Mediate LINC Complex-  
772            Dependent Nuclear Movement and Positioning. *Current biology : CB* **28**, 3086-  
773            3097.e3084, doi:10.1016/j.cub.2018.08.001 (2018).
- 774    40    Meinke, P. *et al.* Muscular dystrophy-associated SUN1 and SUN2 variants  
775            disrupt nuclear-cytoskeletal connections and myonuclear organization. *PLoS*  
776            *Genet* **10**, e1004605, doi:10.1371/journal.pgen.1004605 (2014).
- 777    41    Matsumoto, A. *et al.* Loss of the integral nuclear envelope protein SUN1 induces  
778            alteration of nucleoli. *Nucleus (Austin, Tex.)* **7**, 68-83,  
779            doi:10.1080/19491034.2016.1149664 (2016).

- 780 42 Satomi, E., Ueda, M., Katahira, J. & Hieda, M. The SUN1 splicing variants  
781 SUN1\_888 and SUN1\_916 differentially regulate nucleolar structure. *Genes to*  
782 *cells : devoted to molecular & cellular mechanisms* **25**, 730-740,  
783 doi:10.1111/gtc.12807 (2020).
- 784 43 Nakayama, J., Rice, J. C., Strahl, B. D., Allis, C. D. & Grewal, S. I. Role of  
785 histone H3 lysine 9 methylation in epigenetic control of heterochromatin  
786 assembly. *Science* **292**, 110-113, doi:10.1126/science.1060118 (2001).
- 787 44 Martens, J. H. *et al.* The profile of repeat-associated histone lysine methylation  
788 states in the mouse epigenome. *EMBO J* **24**, 800-812,  
789 doi:10.1038/sj.emboj.7600545 (2005).
- 790 45 Becker, J. S., Nicetto, D. & Zaret, K. S. H3K9me3-Dependent Heterochromatin:  
791 Barrier to Cell Fate Changes. *Trends Genet* **32**, 29-41,  
792 doi:10.1016/j.tig.2015.11.001 (2016).
- 793 46 Cheng, L. *et al.* Chromatin Assembly Factor 1 (CAF-1) facilitates the  
794 establishment of facultative heterochromatin during pluripotency exit. *Nucleic*  
795 *Acids Res* **47**, 11114-11131, doi:10.1093/nar/gkz858 (2019).
- 796 47 Yi, S. A., Han, J. & Han, J. W. Epigenetic role of nuclear S6K1 in early  
797 adipogenesis. *BMB Rep* **49**, 401-402, doi:10.5483/bmbrep.2016.49.8.116 (2016).
- 798 48 Wu, X., Sun, A., Yu, W., Hong, C. & Liu, Z. CXCL10 mediates breast cancer  
799 tamoxifen resistance and promotes estrogen-dependent and independent  
800 proliferation. *Molecular and cellular endocrinology* **512**, 110866,  
801 doi:10.1016/j.mce.2020.110866 (2020).

- 802 49 Hardaway, A. L., Herroon, M. K., Rajagurubandara, E. & Podgorski, I. Marrow  
803 adipocyte-derived CXCL1 and CXCL2 contribute to osteolysis in metastatic  
804 prostate cancer. *Clinical & experimental metastasis* **32**, 353-368,  
805 doi:10.1007/s10585-015-9714-5 (2015).
- 806 50 Lee, J. H. *et al.* CXCL10 promotes osteolytic bone metastasis by enhancing  
807 cancer outgrowth and osteoclastogenesis. *Cancer research* **72**, 3175-3186,  
808 doi:10.1158/0008-5472.can-12-0481 (2012).
- 809 51 Romero-Moreno, R. *et al.* The CXCL5/CXCR2 axis is sufficient to promote breast  
810 cancer colonization during bone metastasis. *Nat Commun* **10**, 4404,  
811 doi:10.1038/s41467-019-12108-6 (2019).
- 812 52 Onan, D. *et al.* The chemokine Cxcl1 is a novel target gene of parathyroid  
813 hormone (PTH)/PTH-related protein in committed osteoblasts. *Endocrinology*  
814 **150**, 2244-2253, doi:10.1210/en.2008-1597 (2009).
- 815 53 Chen, C. *et al.* CXCL5 induces tumor angiogenesis via enhancing the expression  
816 of FOXD1 mediated by the AKT/NF- $\kappa$ B pathway in colorectal cancer. *Cell death*  
817 *& disease* **10**, 178, doi:10.1038/s41419-019-1431-6 (2019).
- 818 54 Goltzman, D. Osteolysis and cancer. *The Journal of clinical investigation* **107**,  
819 1219-1220, doi:10.1172/jci13073 (2001).
- 820 55 Luke, Y. *et al.* Nesprin-2 Giant (NUANCE) maintains nuclear envelope  
821 architecture and composition in skin. *J Cell Sci* **121**, 1887-1898,  
822 doi:10.1242/jcs.019075 (2008).



- 823 56 Alam, S. G. *et al.* The mammalian LINC complex regulates genome  
824 transcriptional responses to substrate rigidity. *Sci Rep* **6**, 38063,  
825 doi:10.1038/srep38063 (2016).
- 826 57 Goelzer, M. *et al.* Lamin A/C Is Dispensable to Mechanical Repression of  
827 Adipogenesis. *Int J Mol Sci* **22**, doi:10.3390/ijms22126580 (2021).
- 828 58 Stephens, A. D., Banigan, E. J., Adam, S. A., Goldman, R. D. & Marko, J. F.  
829 Chromatin and lamin A determine two different mechanical response regimes of  
830 the cell nucleus. *Molecular biology of the cell* **28**, 1984-1996,  
831 doi:10.1091/mbc.E16-09-0653 (2017).
- 832 59 Stephens, A. D. *et al.* Chromatin histone modifications and rigidity affect nuclear  
833 morphology independent of lamins. *Molecular biology of the cell* **29**, 220-233,  
834 doi:10.1091/mbc.E17-06-0410 (2018).
- 835 60 Janin, A., Bauer, D., Ratti, F., Millat, G. & Mejat, A. Nuclear envelopathies: a  
836 complex LINC between nuclear envelope and pathology. *Orphanet journal of rare*  
837 *diseases* **12**, 147, doi:10.1186/s13023-017-0698-x (2017).
- 838 61 Peister, A. *et al.* Adult stem cells from bone marrow (MSCs) isolated from  
839 different strains of inbred mice vary in surface epitopes, rates of proliferation, and  
840 differentiation potential. *Blood* **103**, 1662-1668, doi:10.1182/blood-2003-09-3070  
841 (2004).
- 842 62 Dennis, G., Jr. *et al.* DAVID: Database for Annotation, Visualization, and  
843 Integrated Discovery. *Genome Biol* **4**, P3 (2003).

844

845

# Depletion of Sun1/2 Induces Heterochromatin Accrual in MSCs during Adipogenesis

Matthew Goelzer<sup>1,4</sup>, Sean Howard<sup>1</sup>, Anamaria Zavala<sup>1</sup>, Daniel Conway<sup>3</sup>,  
Andre J van Wijnen<sup>2</sup>, Gunes Uzer<sup>1</sup> †

<sup>1</sup>Boise State University, <sup>2</sup>University of Vermont, <sup>3</sup>Virginia Commonwealth University, <sup>4</sup>Oral Roberts University

† **Corresponding Author**

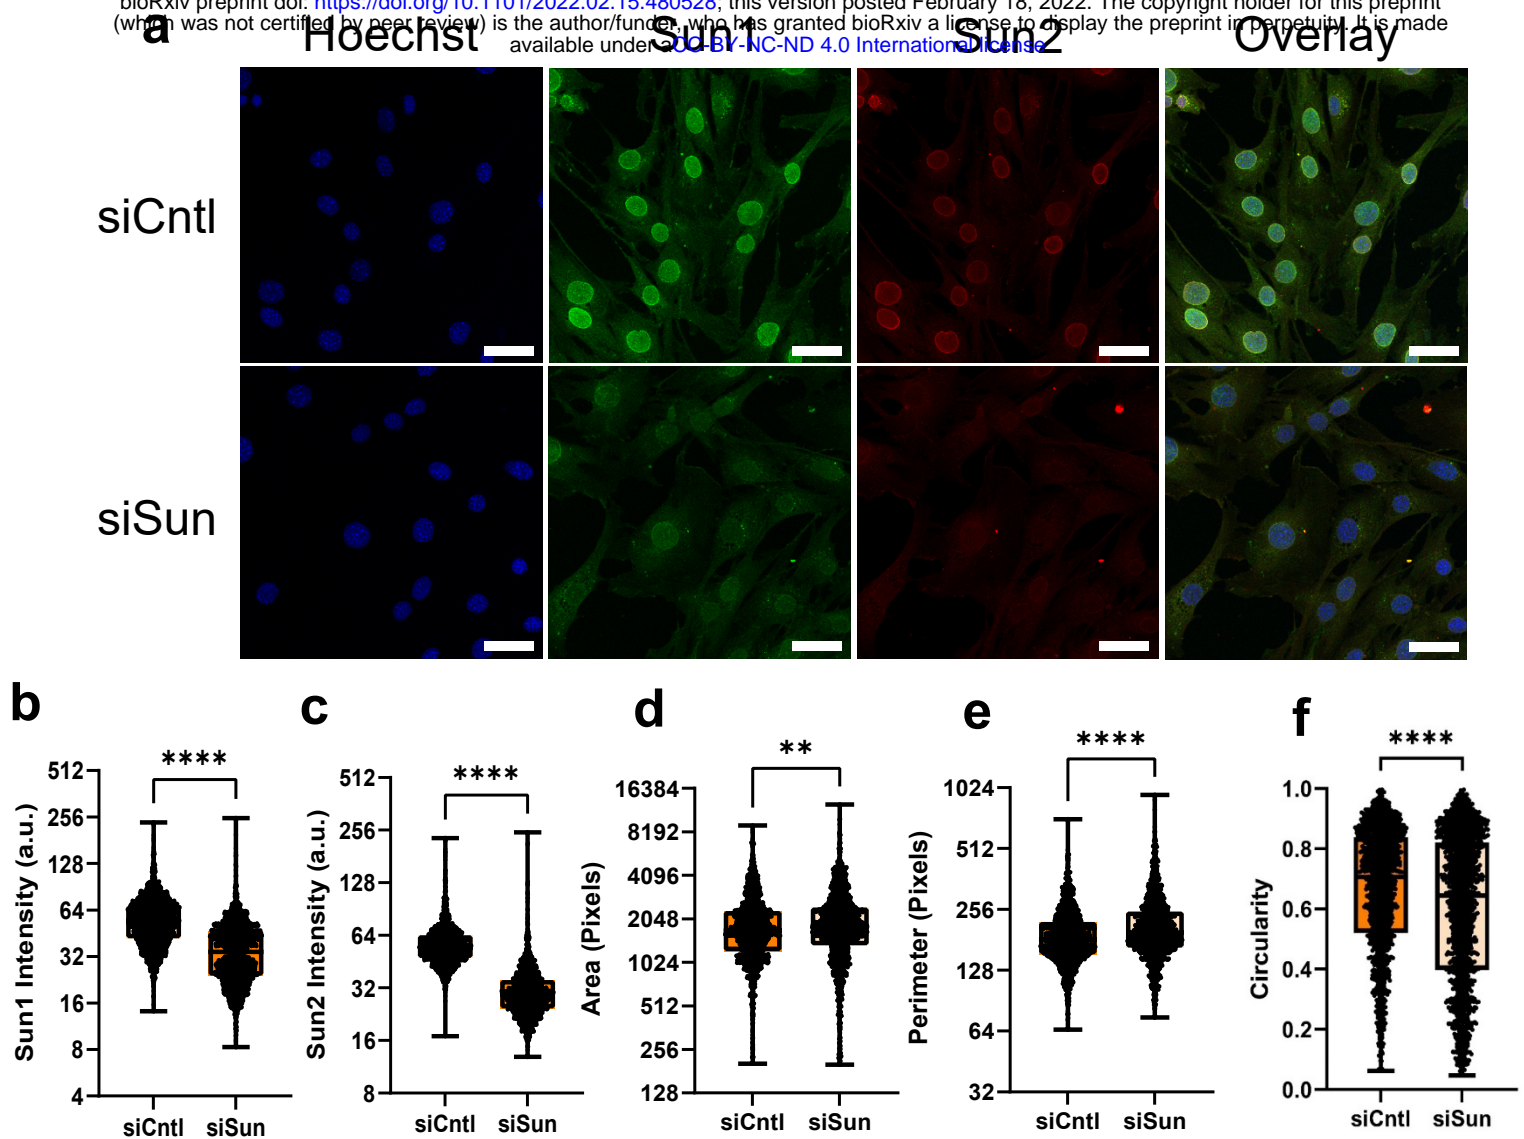

**Figure 1. Sun1/2 Depletion Alters Nuclear Morphology.** **a** Representative images of MSCs treated with siRNA targeting Sun1/2 (siSun) which were stained for Sun1 (green), Sun2 (red), and DNA (blue). **b** siSun treated cells had 47% decrease of Sun1 intensity (n = 1478, P < 0.0001). **c** Sun2 intensity levels were decreased by 52% in siSun treated cells (n = 1478, P < 0.0001). **d** MSCs treated with siSun had an increase in nuclear area by 7% (n = 1478, p 0<0.01). **e** Nucleus perimeter decreased in siSun treated MSCs by 8% (n = 1478, p<0.0001). **f** Nuclear circularity decreased by 9% in siSun treated cells (n = 1478, p<0.001). Comparisons were made against control using non-parametric Mann-Whitney Test where \* P < 0.05, \*\* P < 0.01, \*\*\* P < 0.001, \*\*\*\* P < 0.0001. Scale bar represents 50µm.

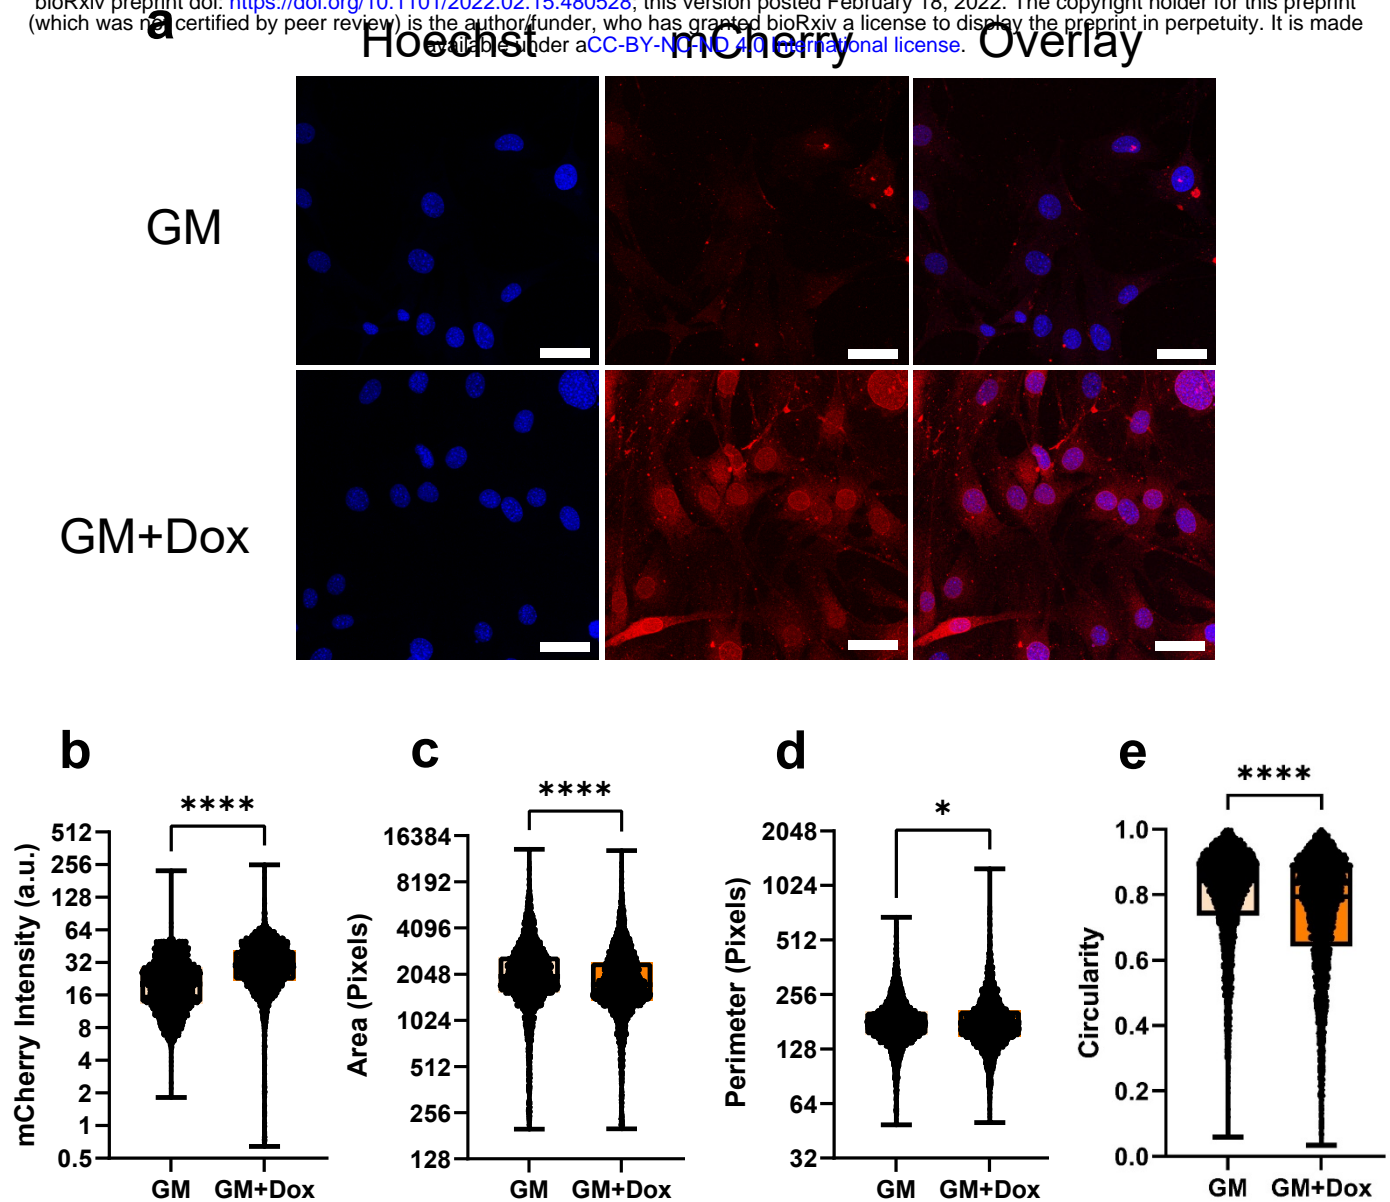

**Figure 2. Dominant-Negative KASH Disruption of the LINC Complex Reduces Nuclear Area.** **a** Representative photos of doxycycline induced dnKASH cells. Images show dnKASH tagged with mCherry (Red) and DNA (Blue). **b** mCherry intensity levels increased by 133% in doxycycline treated MSCs (  $n = 5332$ ,  $P < 0.0001$ ). **c** Doxycycline treated MSCs experienced a 14% decrease of nuclear area ( $n = 5322$ ,  $p 0.001$ ). **d** Nuclear perimeter had a slight decrease of 1% in doxycycline treatment group ( $n = 5322$ ,  $P < 0.05$ ). **e** The circularity experienced a decrease of 6% in doxycycline treatment group ( $n = 5322$ ,  $P < 0.0001$ ). Comparisons were made against control using non-parametric Mann-Whitney Test where \*  $P < 0.05$ , \*\*  $P < 0.01$ , \*\*\*  $P < 0.001$ , \*\*\*\*  $P < 0.0001$ . Scale bar represents  $50\mu\text{m}$ .

**a**

AM Media - + - +

siSun - - + +

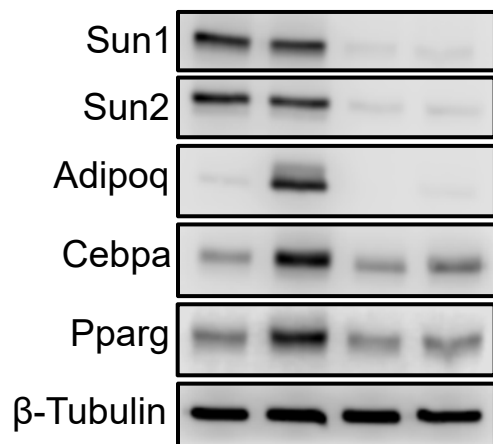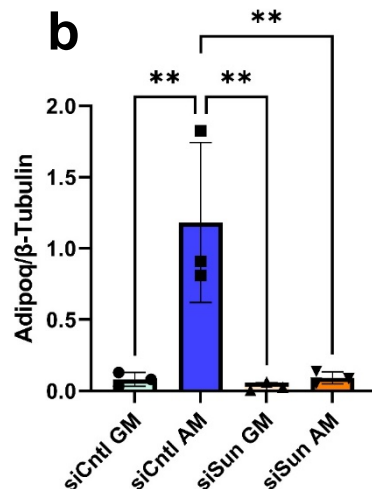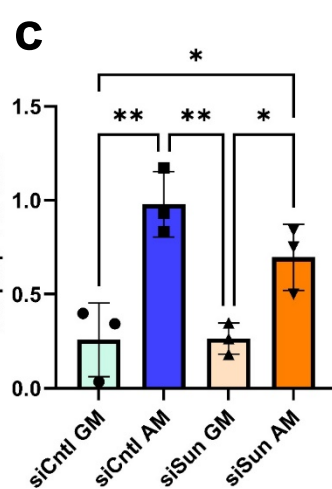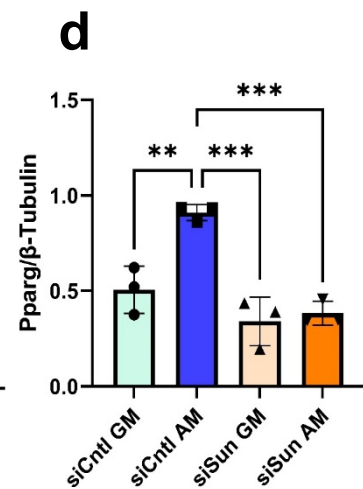

**e**

GM

AM

siCntrl

siSun

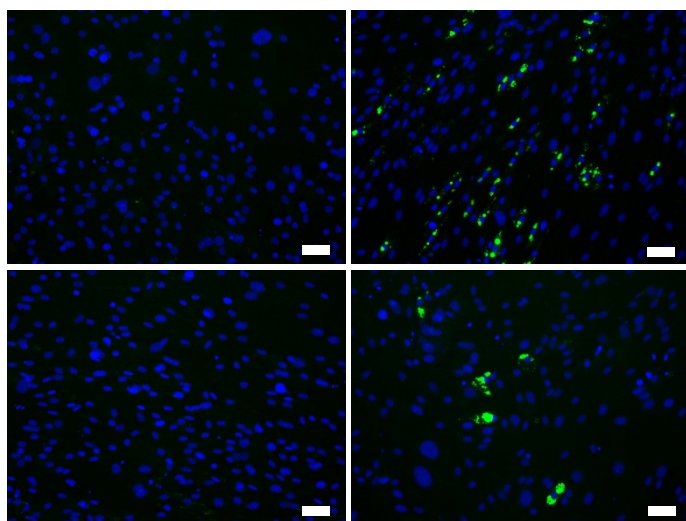

**f**

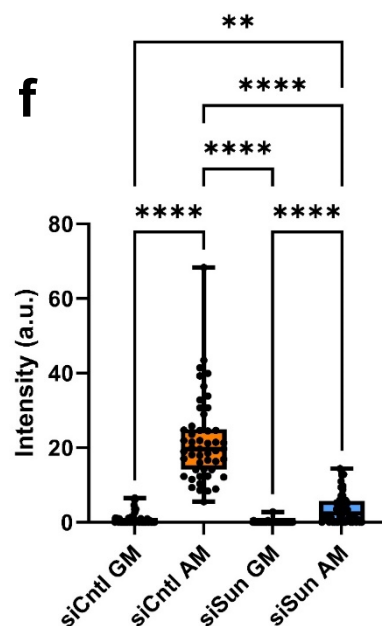

**Figure 3: Depletion of Sun1/2 Inhibits Adipogenesis.** **a** Western analysis of adipogenesis markers Adipoq, Cebpa, and Pparg in growth media and adipogenic media during siSun and siCntrl treatment. **b** Analysis of Adipoq protein levels. Comparison of adipogenic siSun and siCntrl groups showed a 92% reduction of Adipoq ( $n = 3$ ,  $P < 0.01$ ). **c** Cebpa experienced a non-significant reduction of 38% in protein levels in siSun cells compared to siCntrl cells during adipogenesis ( $n = 3$ ,  $p = 0.22$ ). **d** Pparg levels decreased by 58% in adipogenic siSun compared to siCntrl ( $n = 3$ ,  $P < 0.001$ ). **e** Representative images of lipid droplet fluorescence images where MSCs are stained for lipid droplets (green) and DNA (blue). **f** Quantification of the mean fluorescent lipid droplet intensity per cell from individual imaging fields shows a significant reduction of 83% in lipid droplet amounts in adipogenic siSun treatment compared to siCntrl ( $n = 50$ ,  $P < 0.0001$ ). Western analysis group comparisons were One-Way Anova. Lipid droplet intensity group comparisons were made using Kruskal-Wallis test. \*  $P < 0.05$ , \*\*  $P < 0.01$ , \*\*\*  $P < 0.001$ , \*\*\*\*  $P < 0.0001$ . Scale bar represents 50  $\mu$ m.



**a**

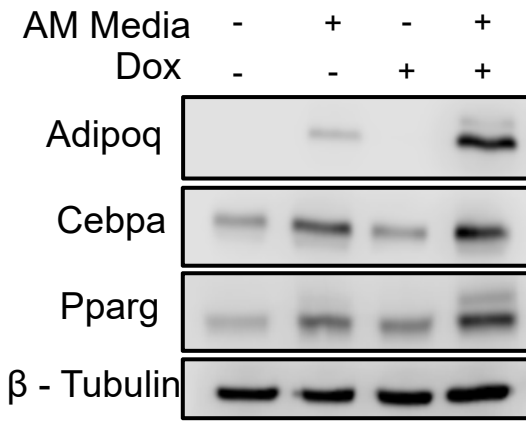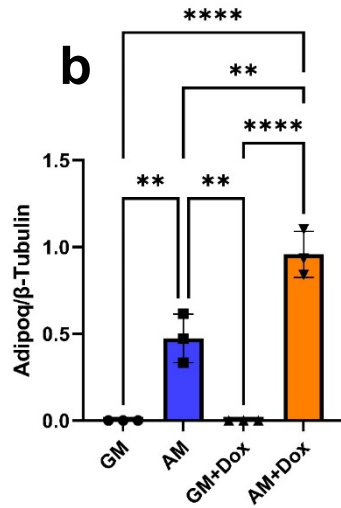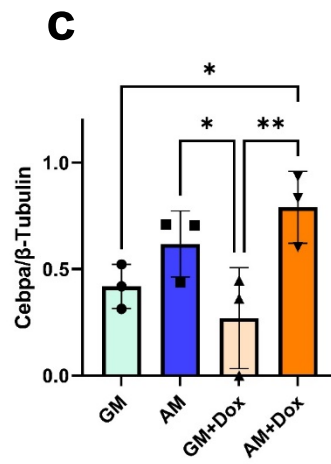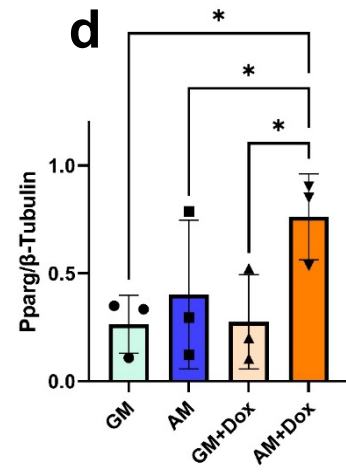

**e**

GM

AM

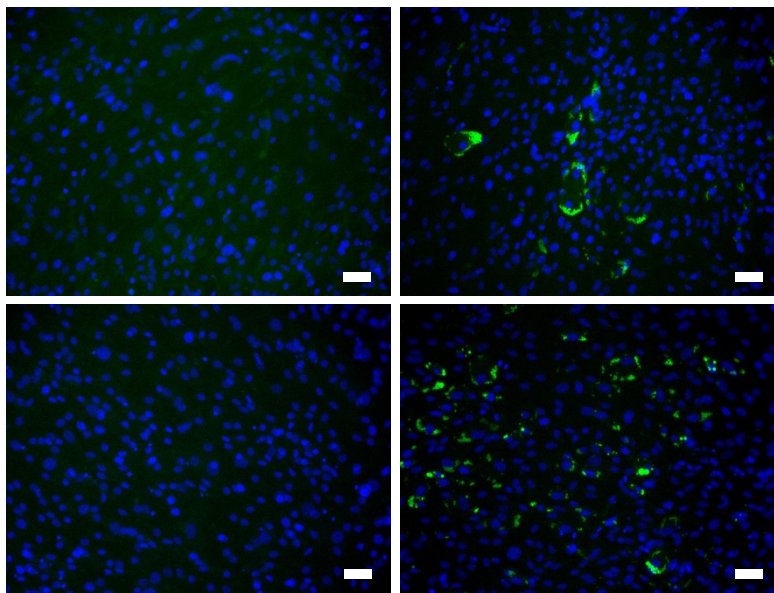

**f**

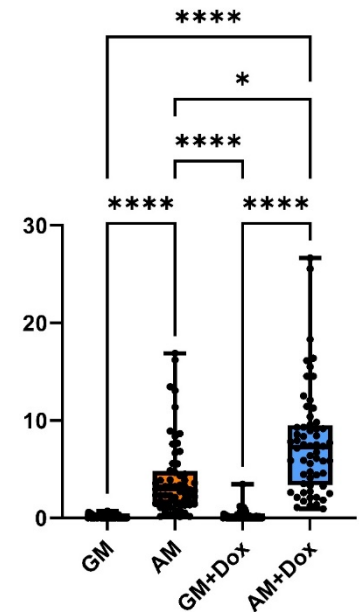

**Figure 4: dnKASH Expression Induces Accelerated Adipogenesis in MSCs.** **a** Representative western images of doxycycline induced dnKASH cells and control cells grown in growth media and adipogenic media. **b** During adipogenesis doxycycline treated samples had 98% increased levels of Adipoq ( $n = 3$ ,  $P < 0.01$ ). **c** Pparg in doxycycline treatment group during adipogenesis increased by 90% ( $n = 3$ ,  $P < 0.05$ ). **d** Cebpa experienced an increase of 27% but was not significant during adipogenesis in doxycycline treatment ( $n = 3$ ,  $p = 0.38$ ). Representative photos of lipid droplets (green) and DNA (blue). **f** Quantification of mean lipid droplet intensity per cell in each field of view showed an increase of lipid droplet amounts in doxycycline treated cells by 258% ( $n = 50$ ,  $P < 0.05$ ) during adipogenesis. Western analysis group comparisons were One-Way Anova. Lipid Droplet Intensity group comparisons were made using Kruskal-Wallis test. \*  $P < 0.05$ , \*\*  $P < 0.01$ , \*\*\*  $P < 0.001$ , \*\*\*\*  $P < 0.0001$ . Scale bar represents 50 $\mu$ m.

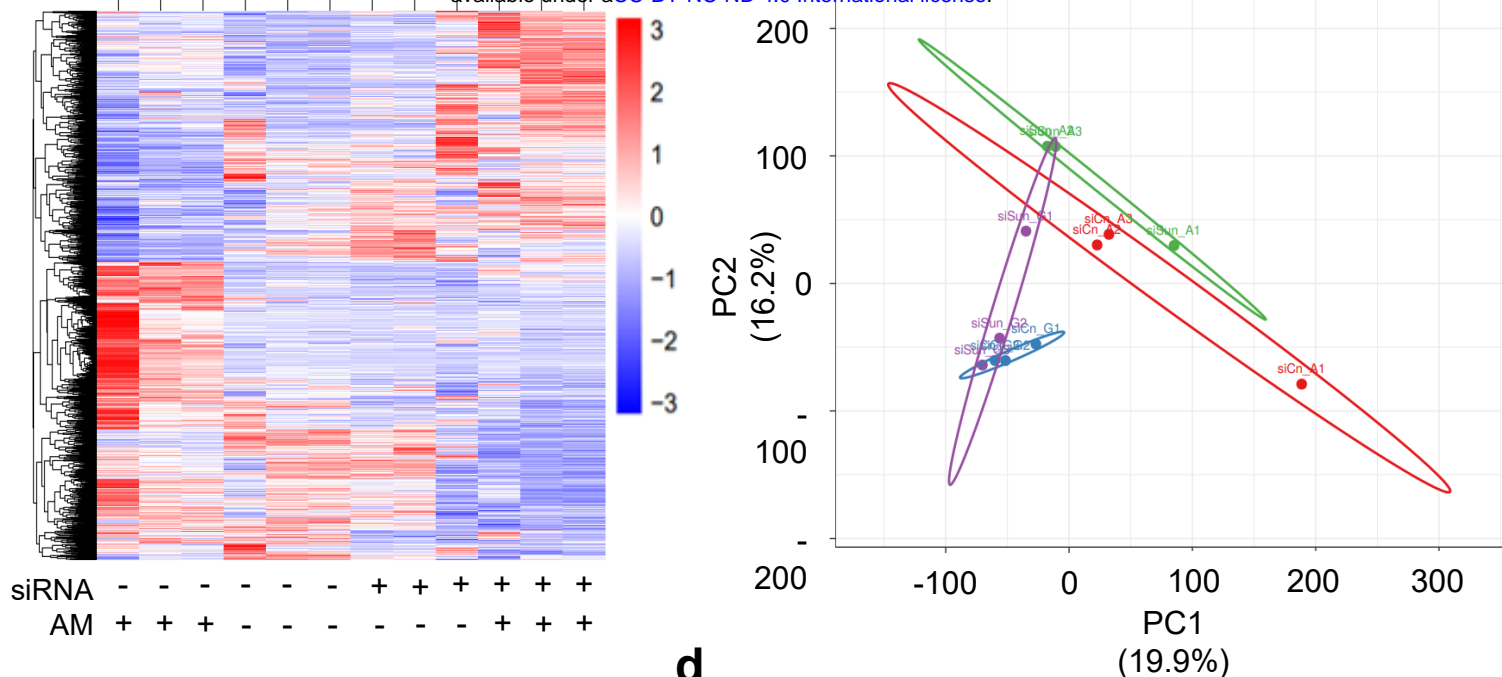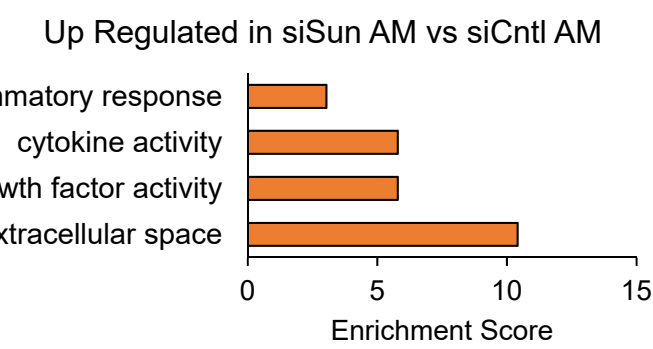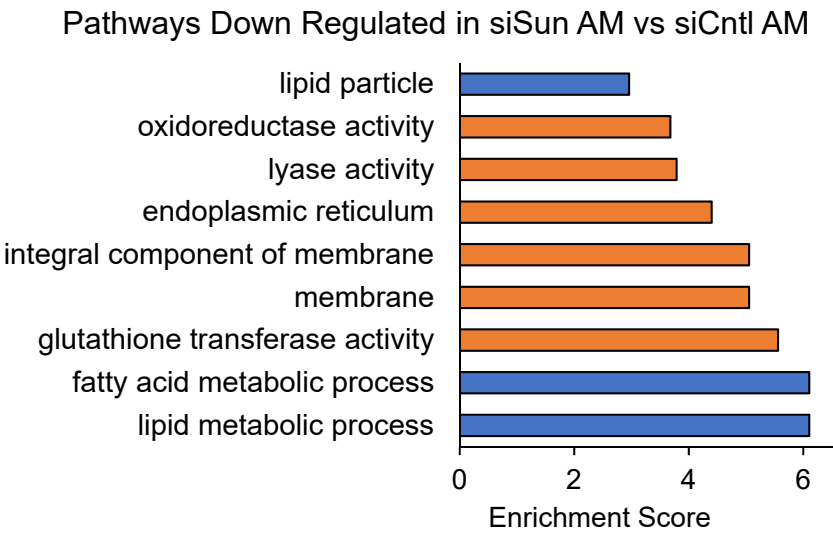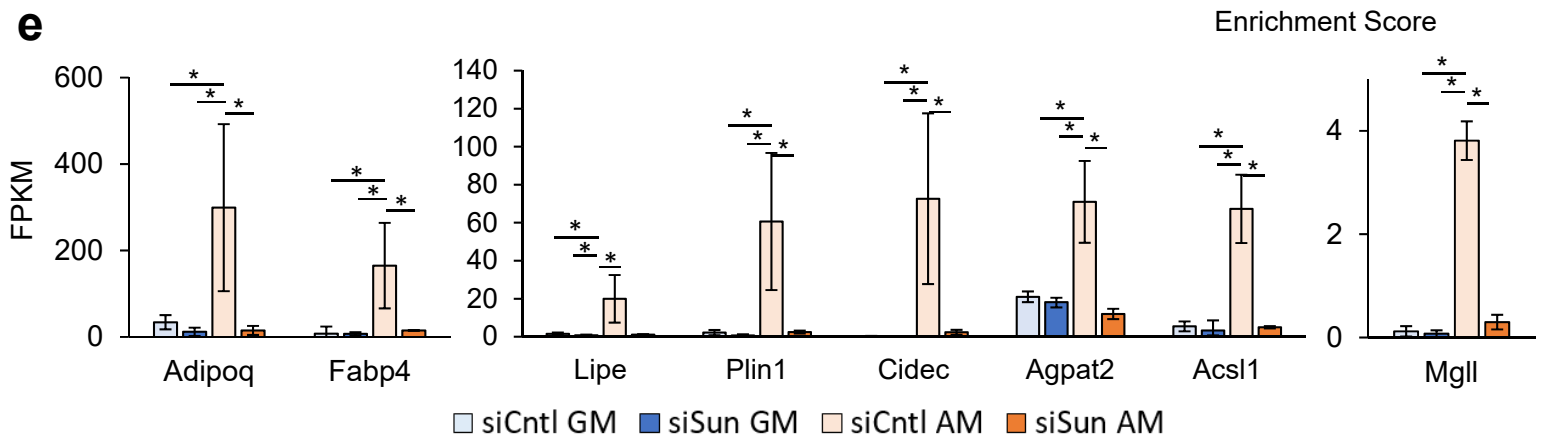

**Figure 5: Sun1/2 Depletion Decreases Adipogenesis and Lipid Metabolism Related Genes.** **a** Heatmap of genes with significant differential (FC > 1 and P < 0.05) gene expression during Sun1/2 depletion (n = 24). **b** Principle component plot where principal component 1 and principal component 2 explain 19.9% and 16.2% of the total variance, respectively. Prediction ellipses indicate that with a probability of 0.95, a new observation from the same group will fall inside the ellipse. n = 24 data points. **c** DAVID analysis of genes up regulated in siSun treatment compared to siCntl. Pathways selected have FDR < 0.05. **d** DAVID analysis of genes down regulated in siSun group compared to siCntl. Pathways selected have FDR < 0.05. Blue indicates pathways related to adipogenesis and lipid metabolism. **e** FPKM values for adipogenic and lipid metabolism related genes detected in both differential gene expression (FC > 1, P < 0.05) and in DAVID analysis (FDR < 0.05) (n = 3/grp). Group comparison was made using One-Way ANOVA where \* P < 0.05.

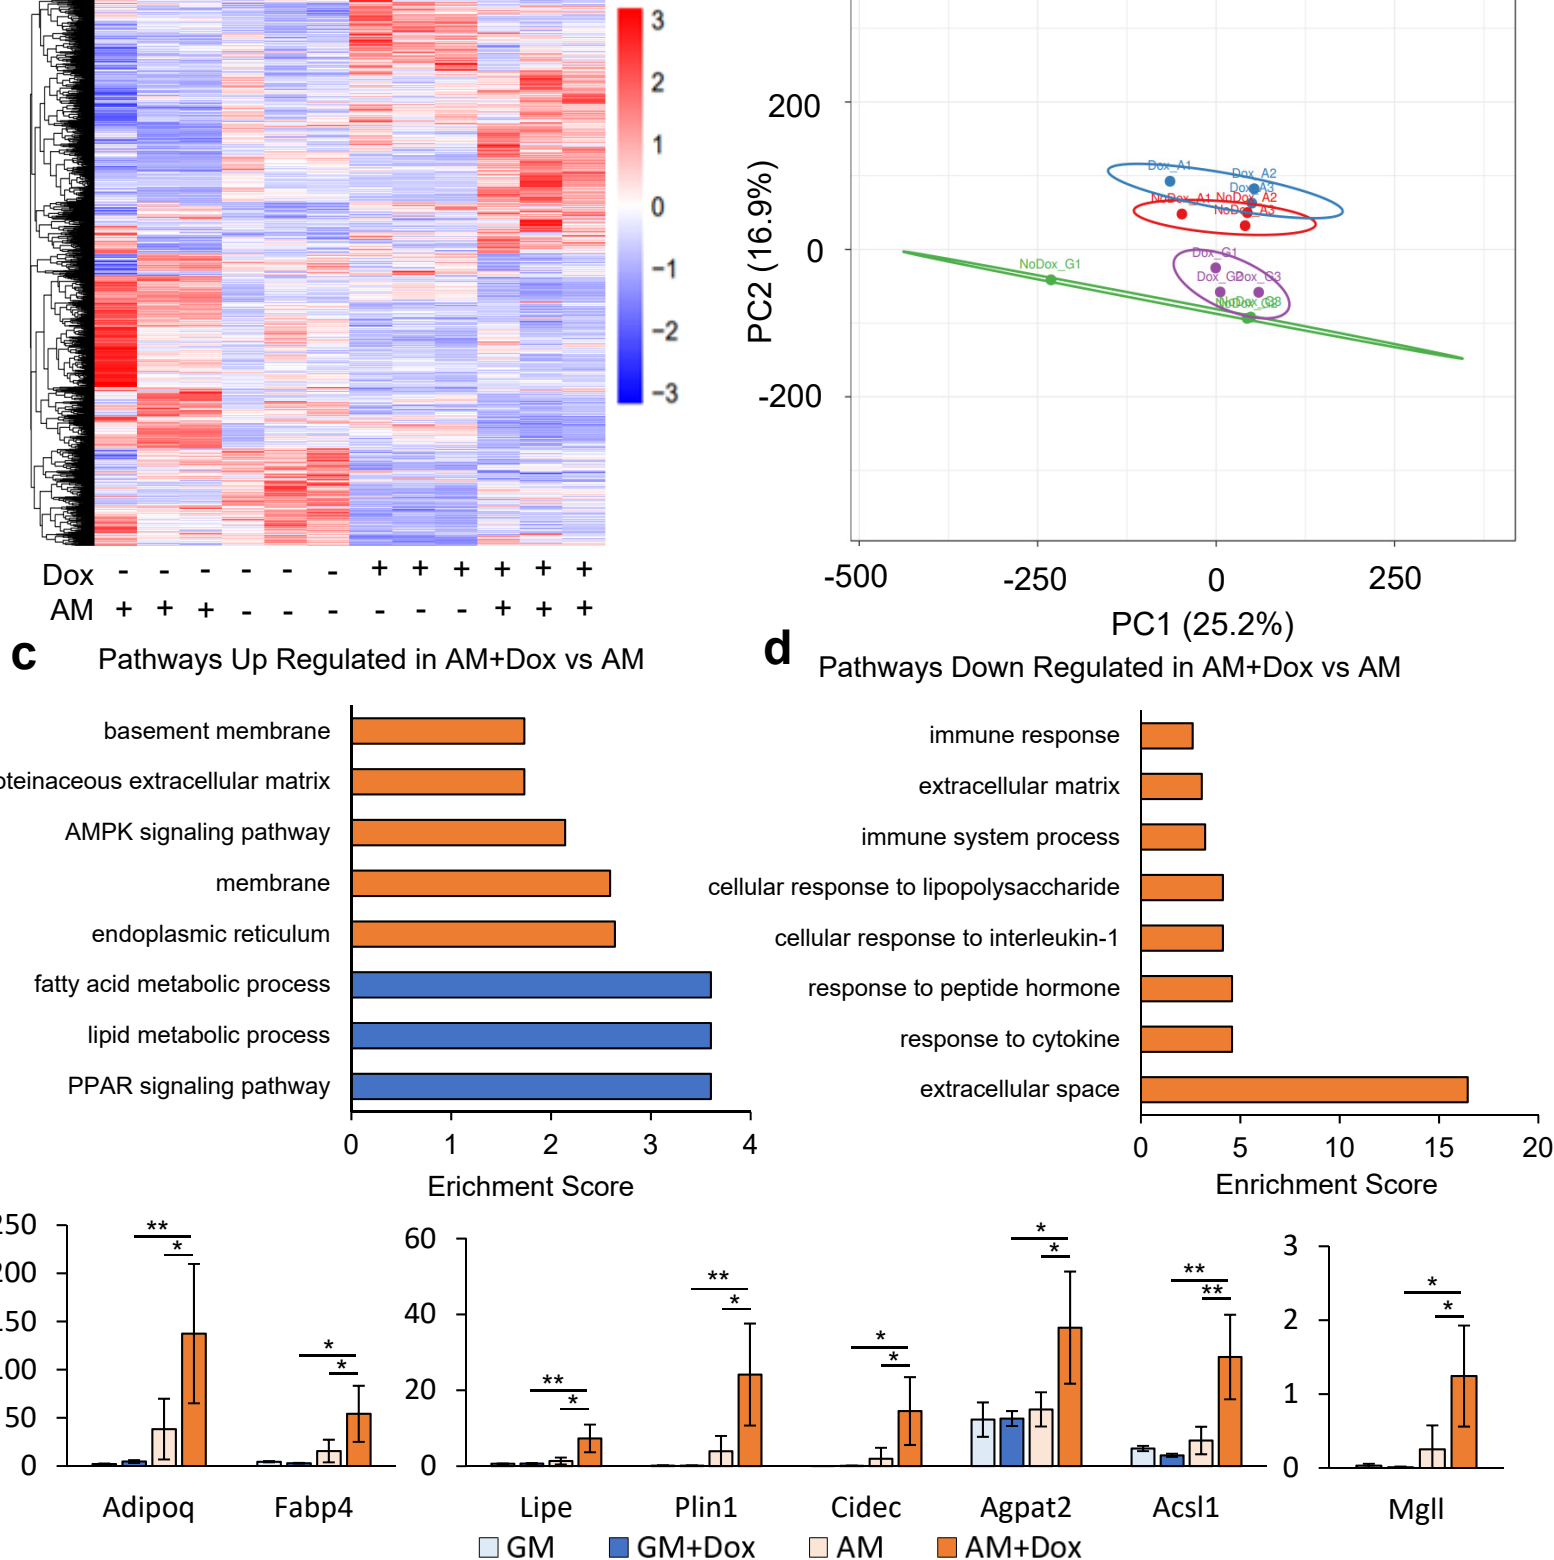

**Figure 6: Dominant-Negative KASH Expression Upregulates Adipogenesis Related Pathways.** **a** Heatmap of genes with significant differential (FC > 1 and P < 0.05) gene expression during doxycycline induced dnKASH expression (n = 24). **b** Principle component plot where principal component 1 and principal component 2 explain 25.2% and 16.9% of the total variance, respectively. Prediction ellipses indicate that with a probability of 0.95, a new observation from the same group will fall inside the ellipse. n = 24 data points. **c** DAVID analysis of genes up regulated in doxycycline treatment compared to control. Blue indicates pathways related to adipogenesis and lipid metabolism. Pathways selected have FDR < 0.05. **d** DAVID analysis of genes down regulated in doxycycline group compared to control. Pathways selected have FDR < 0.05. **e** FPKM values for adipogenic and lipid metabolism related genes detected in both differential gene expression (FC > 1, P < 0.05) and in DAVID analysis (FDR < 0.05) (n = 3/grp). Group comparison was made using One-Way ANOVA. \* P < 0.05, \*\* P < 0.01.



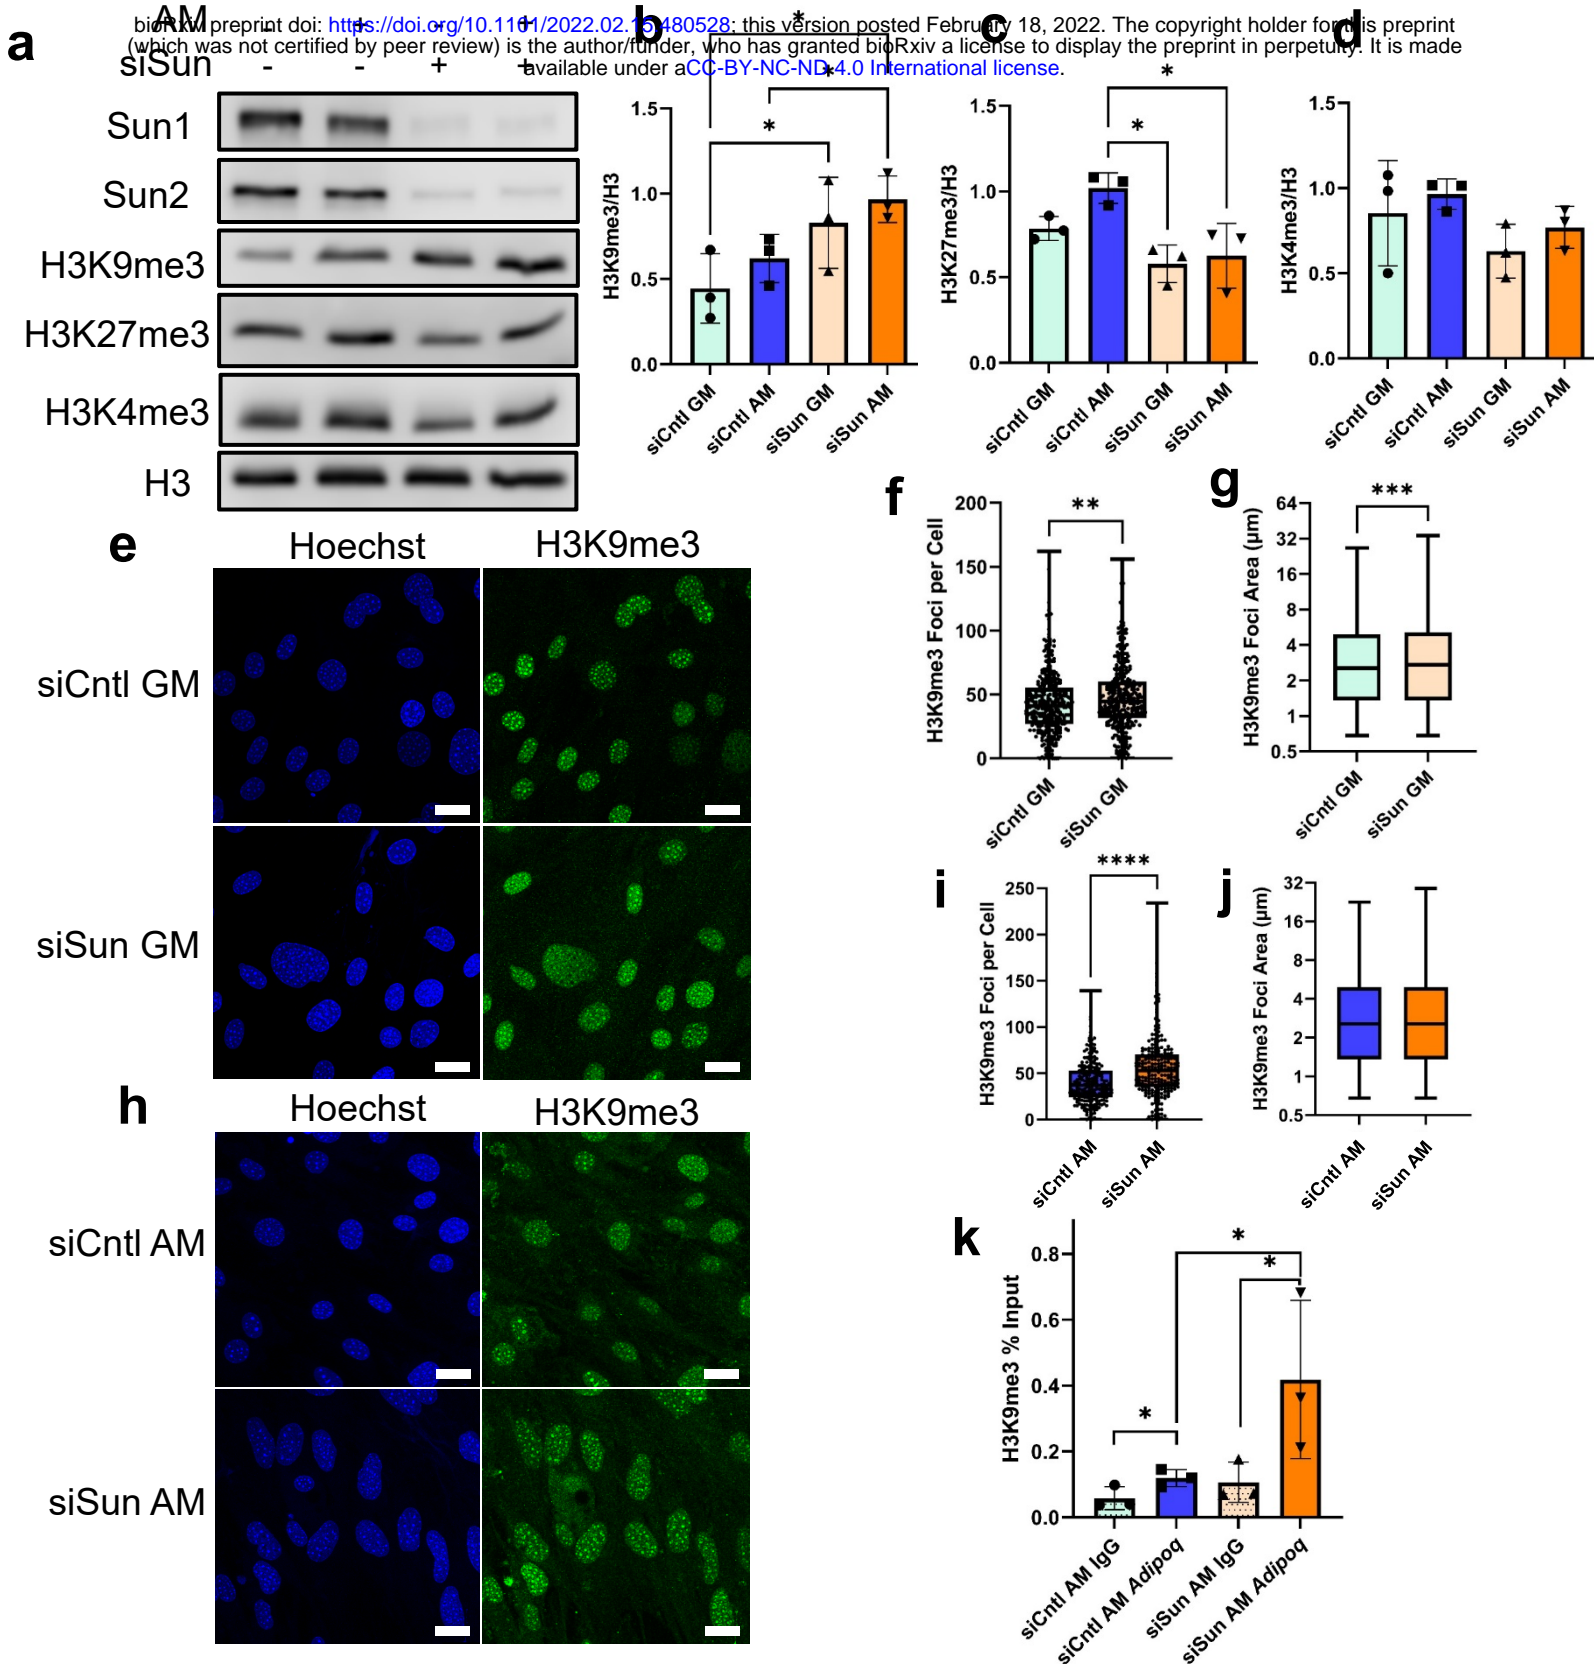

**Figure 7: Global levels of H3K9me3 and Enrichment on Adipoq increases during Sun1/2 depletion.** **a** Representative western images of heterochromatin markers H3K9me3 and H3K27me3 and euchromatin marker H3K4me3 in siSun and siCntrl treatments during growth in growth media and adipogenic media. **b** Western analysis of heterochromatin marker H3K9me3 revealed an increase of 56% in siSun cells compared to siCntrl during adipogenesis ( $n = 3$ ,  $P < 0.05$ ). **c** H3K27me3 had a decrease of 48% in siSun cells compared to siCntrl cells during adipogenesis ( $n = 3$ ,  $P < 0.05$ ). **d** Euchromatin marker H3K4me3 experienced no significant changes in global protein levels between siSun and siCntrl treated cells during adipogenesis. **e** Representative images of siCntrl and siSun treated cells grown in growth media staining for H3K9me3 (green) and Hoescht (blue). **f** H3K9me3 foci count per cell in siSun cells compared to siCntrl cells in growth media increased by 9% ( $n = 338$ ,  $P < 0.01$ ). **g** H3K9me3 foci area increased by 7% in siSun cells compared to siCntrl in growth media ( $n = 14560$ ,  $P < 0.001$ ). **h** Representative images of siSun and siCntrl treated cells grown in adipogenic media and stained for H3K9me3 (green) and Hoescht (blue). **i** H3K9me3 foci count per cell in siSun cell compared to siCntrl Cells during adipogenesis increased by 43% ( $n = 213$ ,  $P < 0.0001$ ). **j** No detectable increase of H3K9me3 foci area was found in siSun cells during adipogenesis ( $n = 8460$ ). **k** CUR&RUN-qPCR targeting H3K9me3 localization on Adipoq showed an increased of 156% in siSun cells compared to siCntrl ( $n = 3$ ,  $P < 0.05$ ). Western analysis group comparisons were One-Way Anova. H3K9me3 Foci count and area comparisons were made using Mann-Whitney Test. CUR&RUN-qPCR comparisons were done using One-Tailed Students T-Test. \*  $P < 0.05$ , \*\*  $P < 0.01$ , \*\*\*  $P < 0.001$ , \*\*\*\*  $P < 0.0001$ . Scale bar represents 25µm.

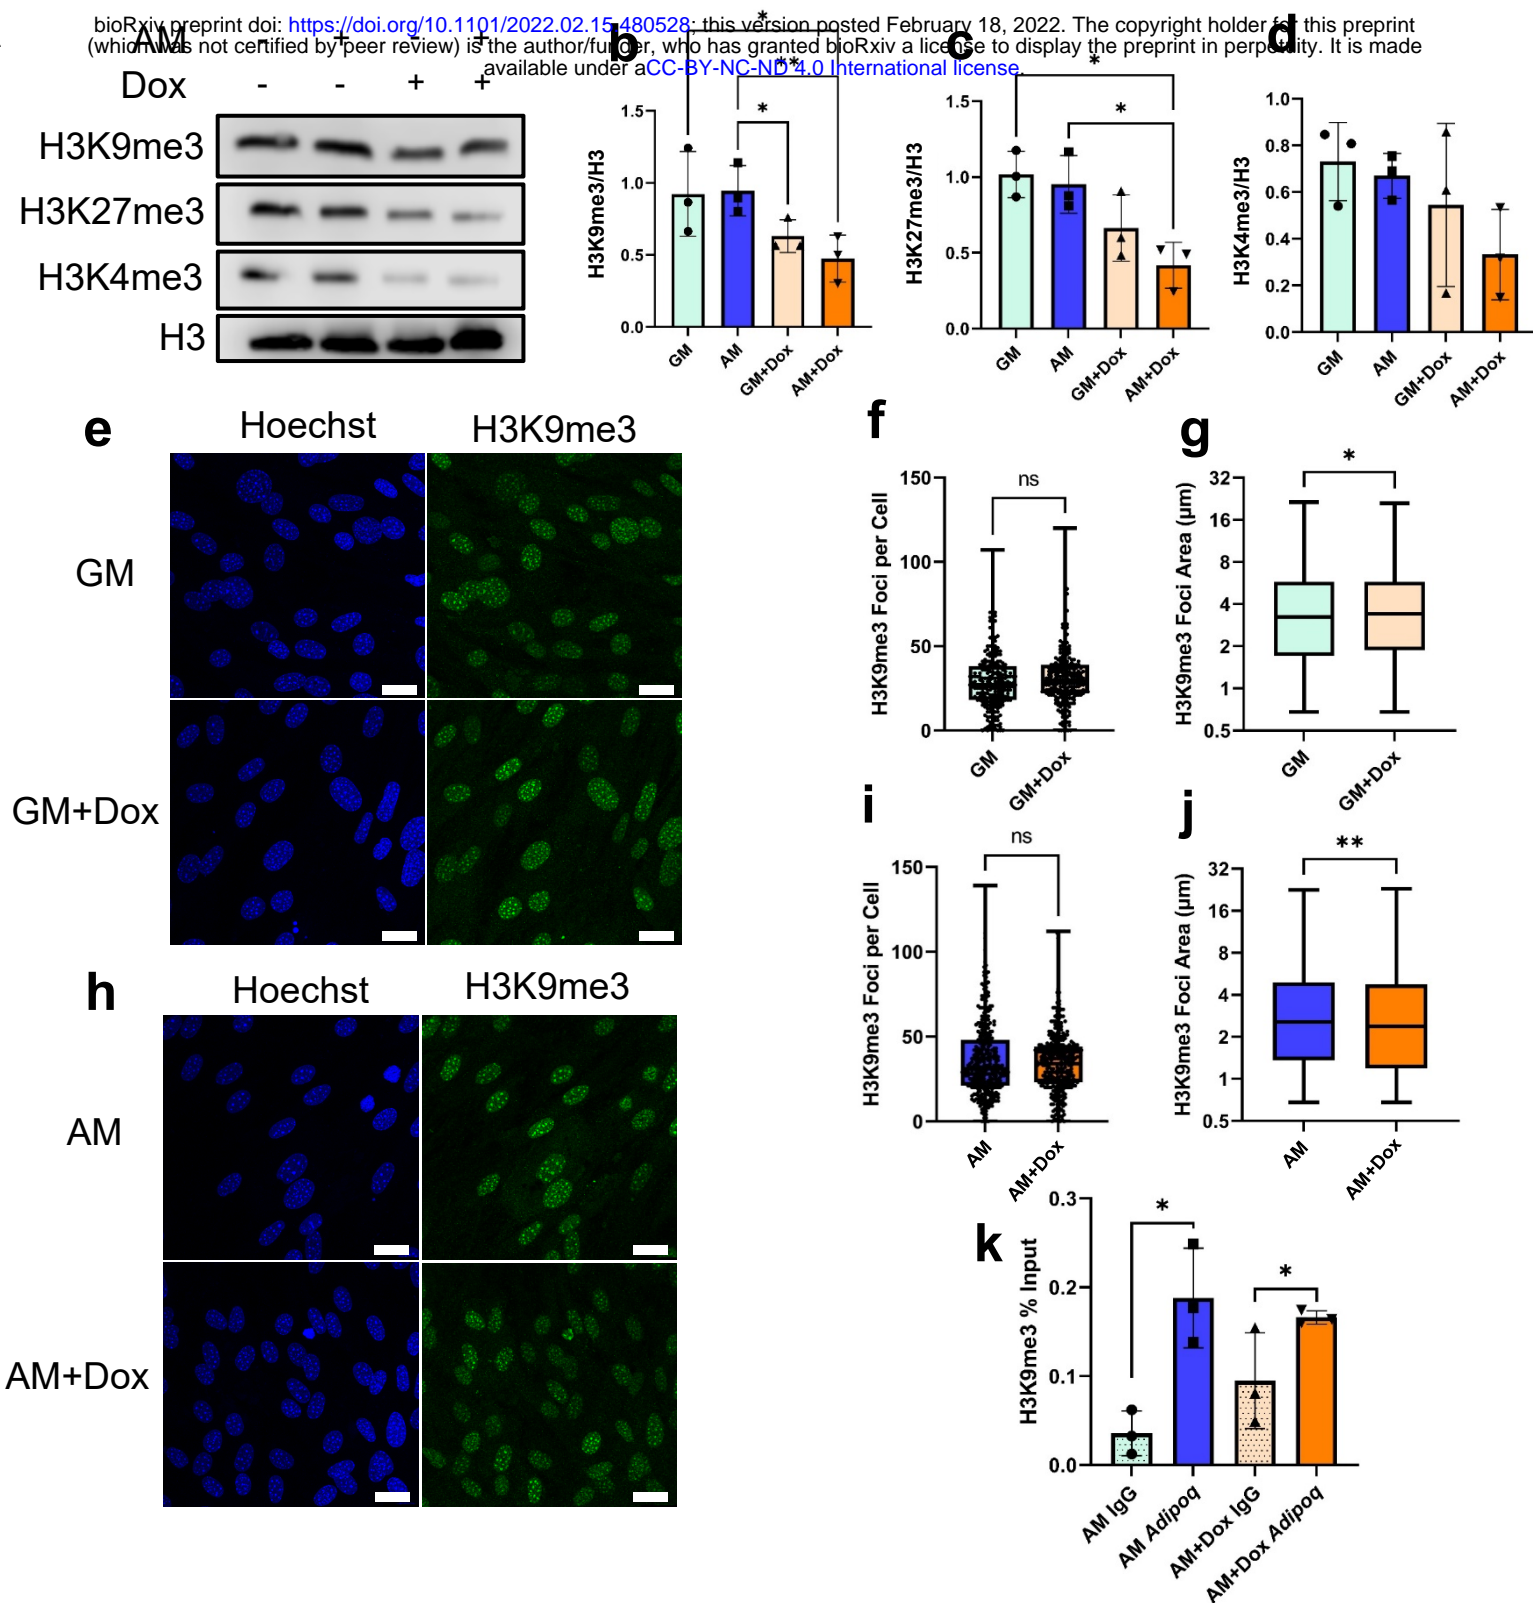

**Figure 8: H3K9me3 Levels Are Unaltered During dnKASH Disruption of the LINC Complex.** **a** Representative images of doxycycline induced dnKASH expression of heterochromatin markers H3K9me3 and H3K27me3 and euchromatin marker. **b** H3K9me3 levels decreased during adipogenesis in doxycycline treatment group compared to controls by 51% ( $n = 3$ ,  $P < 0.01$ ). **c** H3K27me3 levels decreased by 56% in doxycycline treatment group compared to control during adipogenesis ( $n = 3$ ,  $P < 0.05$ ). **d** H3K4me3 levels had no significant changes in doxycycline. **e** Representative confocal imaging of H3K9me3 (green) and DNA (Blue) in growth media. **f** Analysis of H3K9me3 foci count per cell in the doxycycline treatment group in growth media showed no significant changes in foci count per cell ( $n = 246$ ). **g** H3K9me3 foci area increased by 5% in doxycycline treatment group in growth media ( $n = 7350$ ,  $P < 0.05$ ). **h** Representative images of doxycycline treated cells and controls cells stained for H3K9me3 (green) and Hoescht (blue) during growth in adipogenic media. **i** H3K9me3 foci count per cell did not show significant changes between doxycycline treatment group and control group during growth in adipogenic media ( $n = 328$ ). **j** Doxycycline treatment group had decreased H3k9me3 foci area during adipogenesis by 7% compared to control ( $n = 11317$ ,  $P < 0.01$ ). **k** CUR&RUN-qPCR targeting H3K9me3 localization on Adipoq showed no significant increased in doxycycline treatment cells compared to controls ( $n = 3$ ). Western analysis group comparisons were One-Way Anova. H3K9me3 Foci count and area comparisons were made using Mann-Whitney Test. CUR&RUN-qPCR comparisons were done using One-Tailed Students T-Test. \*  $P < 0.05$ , \*\*  $P < 0.01$ , \*\*\*  $P < 0.001$ , \*\*\*\*  $P < 0.0001$ . Scale bar represents 25 $\mu\text{m}$ .

## Supplementary Figures: Depletion of Sun1/2 Induces Heterochromatin Accrual in MSCs during Adipogenesis

Matthew Goelzer<sup>1,4</sup>, Sean Howard<sup>1</sup>, Anamaria Zavala<sup>1</sup>, Daniel Conway<sup>3</sup>,  
Andre J van Wijnen<sup>2</sup>, Gunes Uzer<sup>1</sup> †

<sup>1</sup>Boise State University, <sup>2</sup>University of Vermont, <sup>3</sup>Virginia Commonwealth  
University, <sup>4</sup>Oral Roberts University

† **Corresponding Author**

**a**

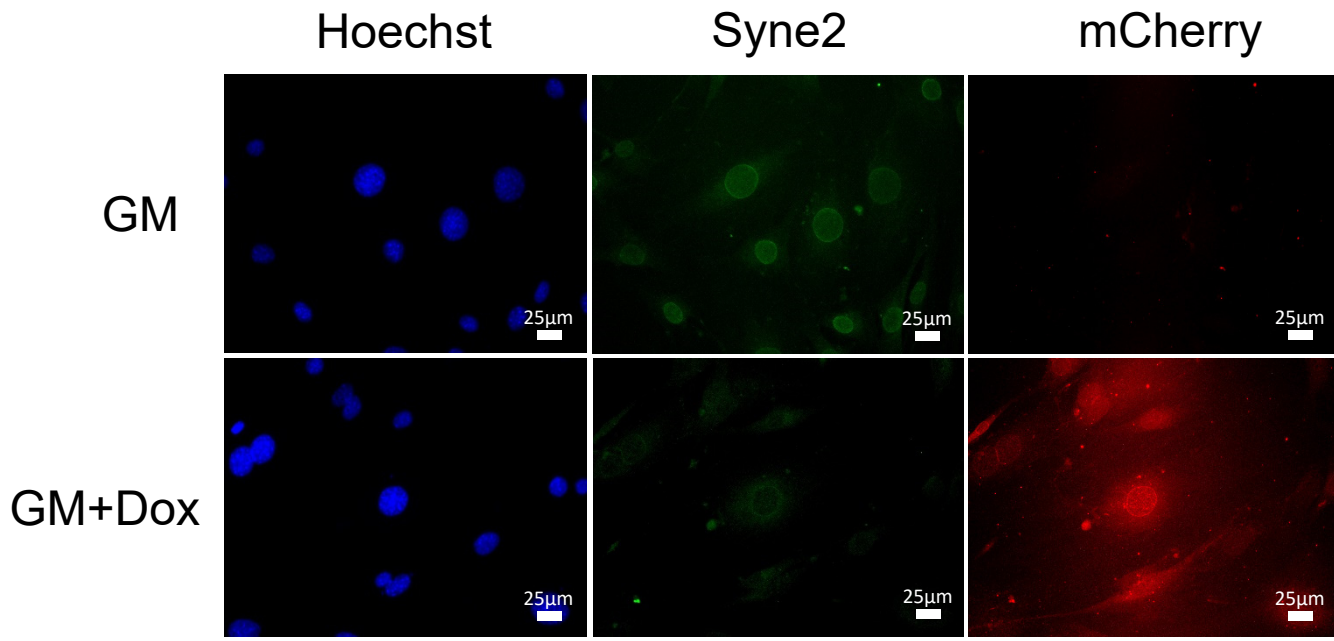

**b**

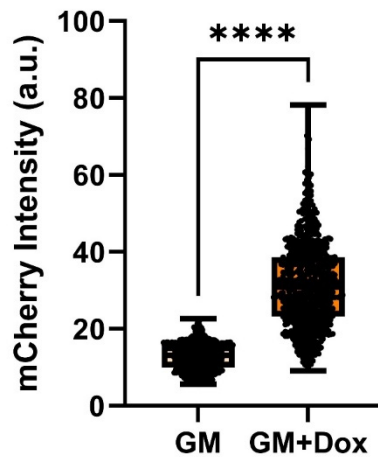

**c**

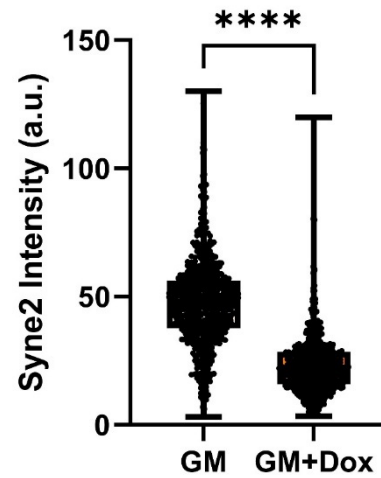

**Fig. S1 :dnKASH Expression Displaces Nesprin2 (Syne2) from Nuclear Envelope.** **a** Representative confocal images of nuclei (Hoechst), Syne2 (Green), and dnKASH (mCherry) in GM and GM+Dox treated MSCs. **b** mCherry intensity per nucleus. GM+Dox MSCs had 200% increase of mCherry intensity ( $n = 1400$ ,  $P < 0.0001$ ). **c** Nesprin2 (Syne2) intensity levels per nucleus. GM+Dox cells had 62% decrease in intensity compared to GM group ( $n = 1400$ ,  $P < 0.0001$ ). Groups were compared using Two-Tailed Students T-Test where \*\*\*\* =  $P < 0.0001$ .

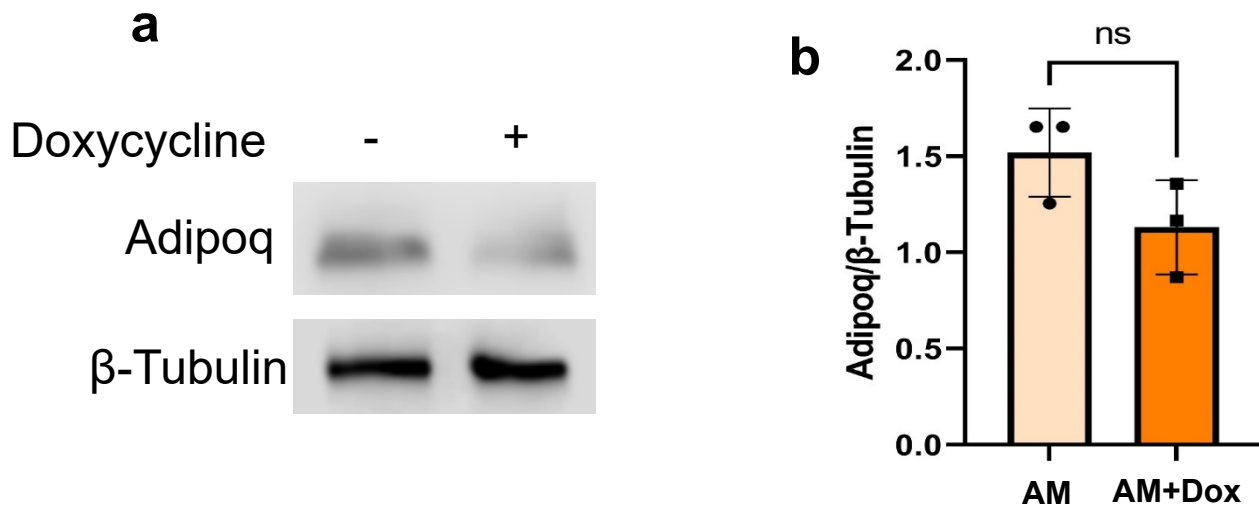

**Fig. S2 :Determination of Doxycycline Treatment on Adipogenesis in MSCs.** **a** Representative western blot images of Adipoq during growth in adipogenic media with or without doxycycline. **b** Western blot analysis of Adipoq protein levels during in MSCs grown in adipogenic media with and without doxycycline. No significant differences were detected between AM+Dox or AM groups. Groups were compared using Two-Tailed Students T-Test.



## Immune Response and Extracellular Space

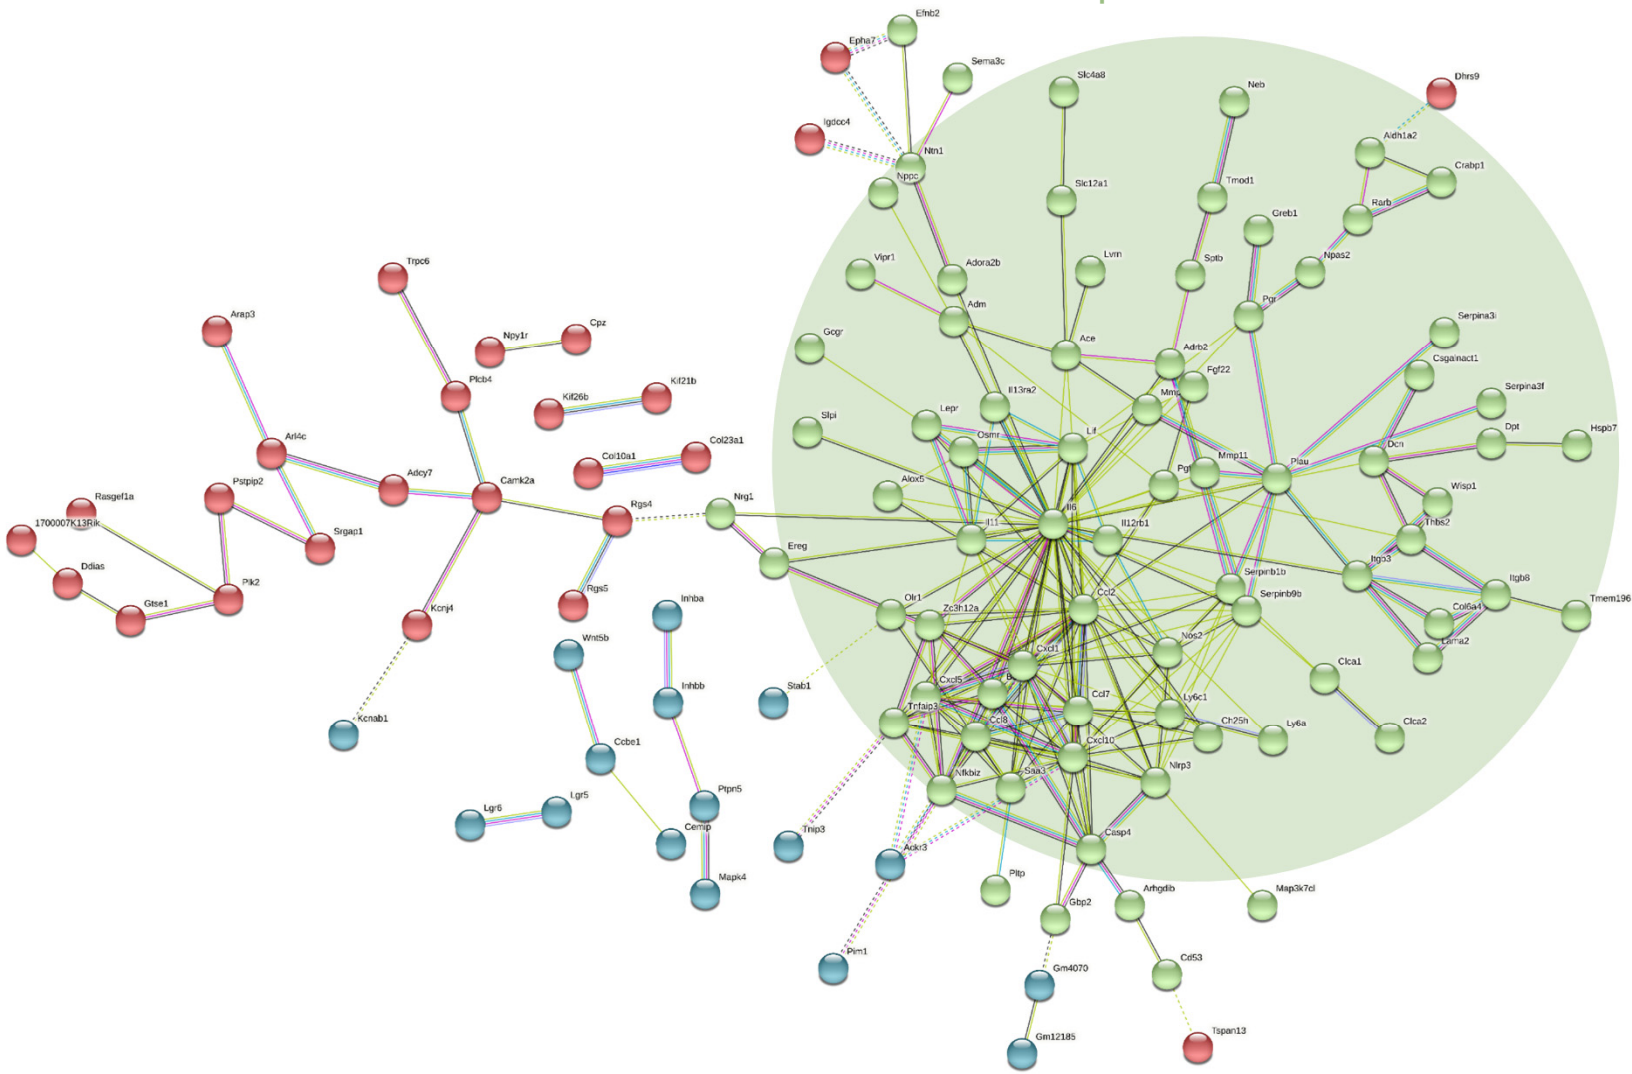

**Fig. S3: STRING analysis of up regulated genes in siSun AM vs siCntl AM.** Green cluster of genes were associated with immune system response and extracellular space (FDR < 0.05).

Up Regulated Genes in siSun AM vs siCntl AM



## Immune response

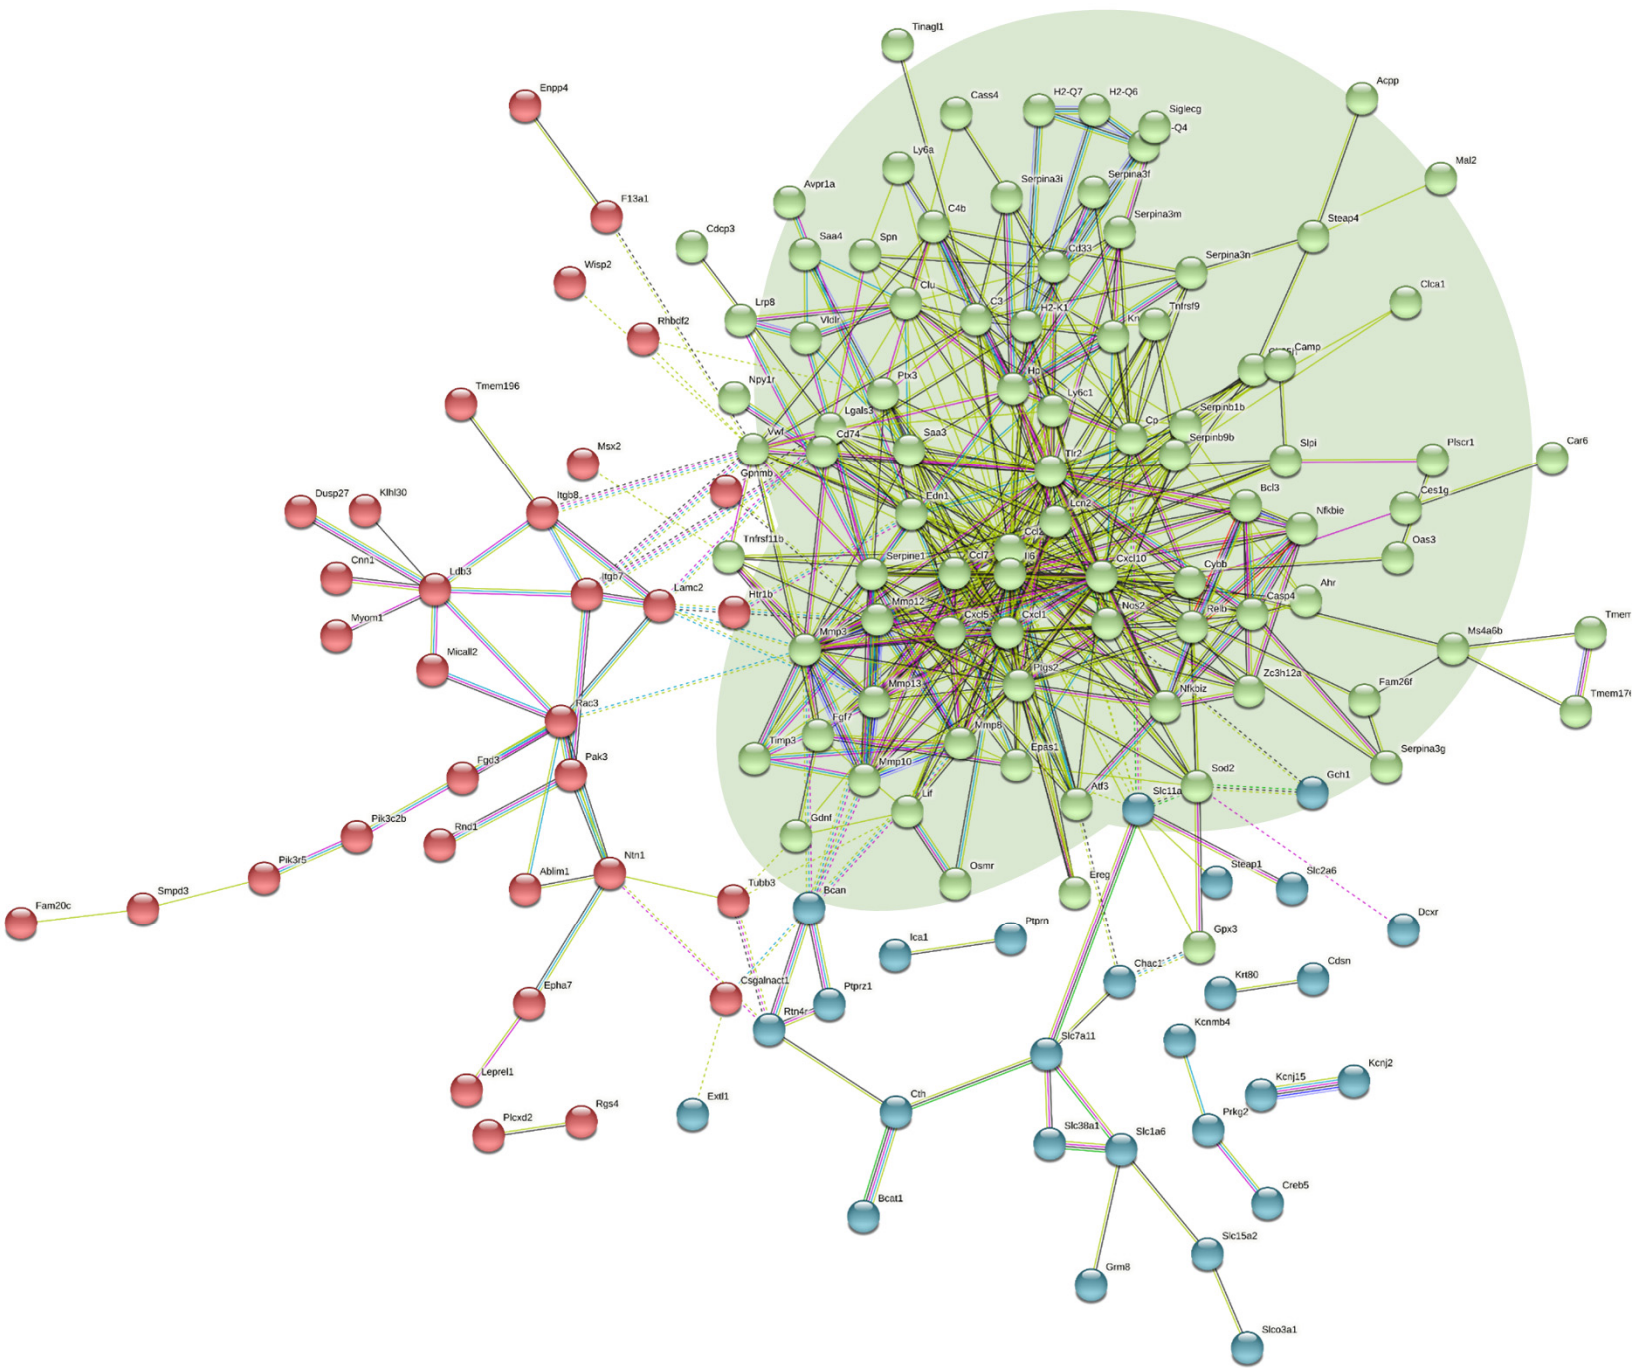

**Fig. S5: STRING analysis of down regulated genes in AM+Dox vs AM. Green cluster represents genes identified in immune response pathway (FDR < 0.05).**



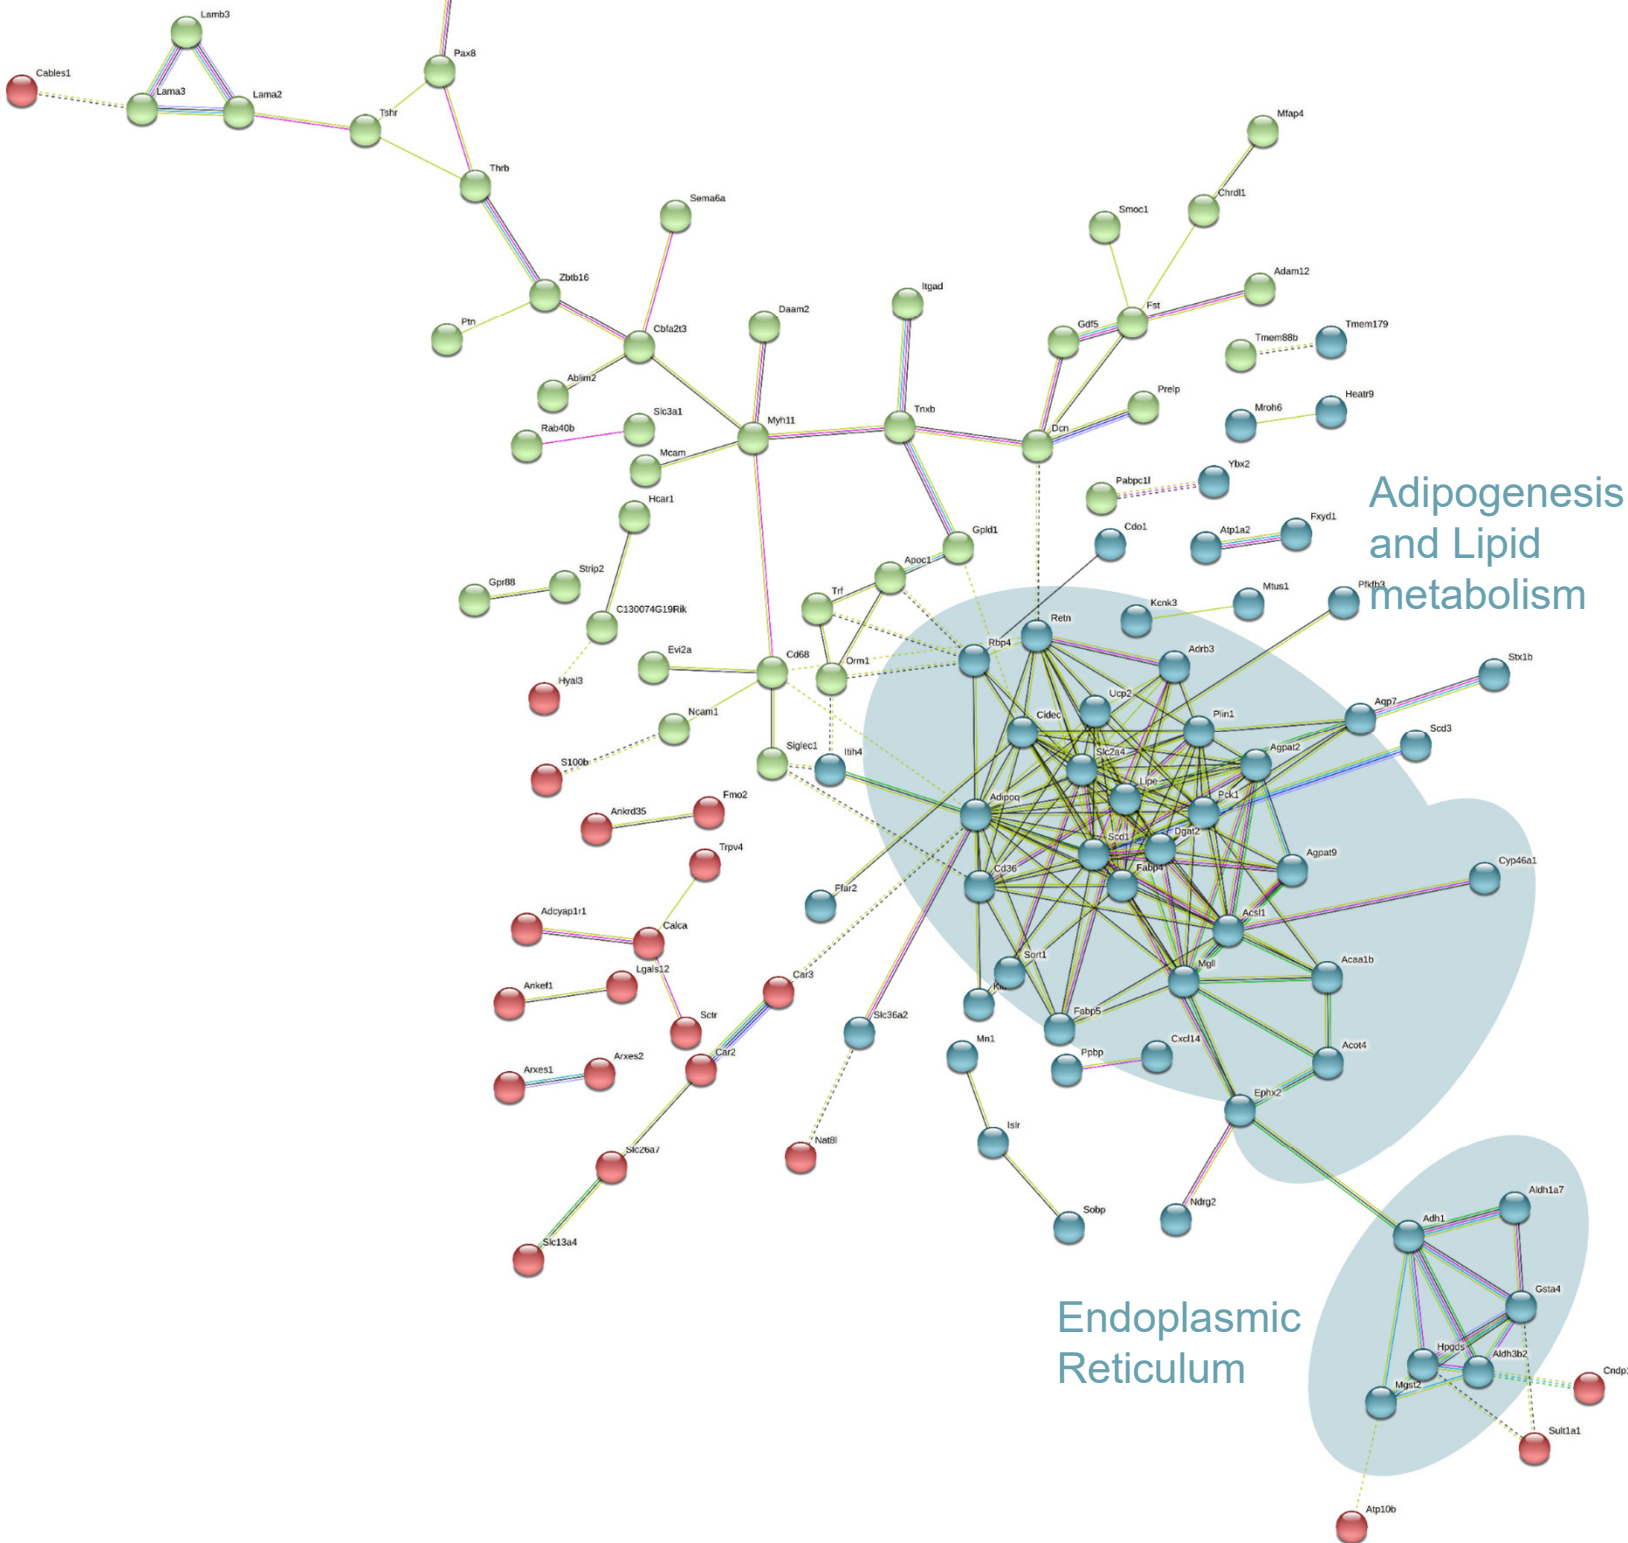

**Fig. S6: STRING analysis of up regulated genes in AM+Dox vs AM.** Blue cluster of genes were associated with adipogenesis and lipid metabolism pathways and endoplasmic reticulum (FDR < 0.05).

**a**

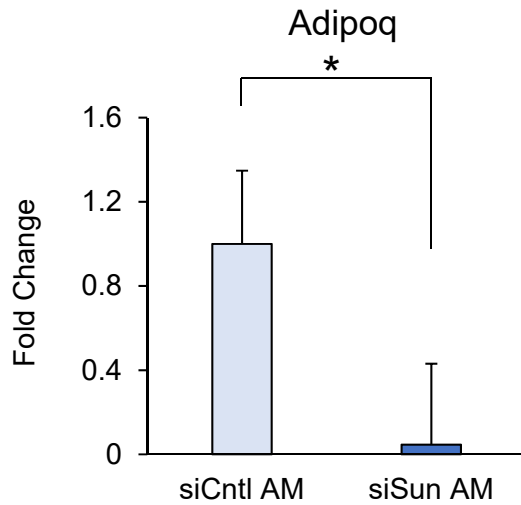

**b**

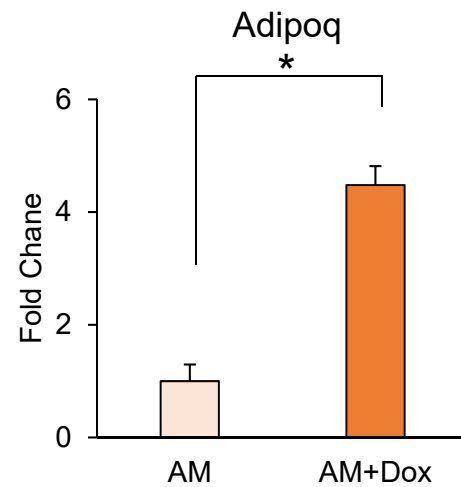

**c**

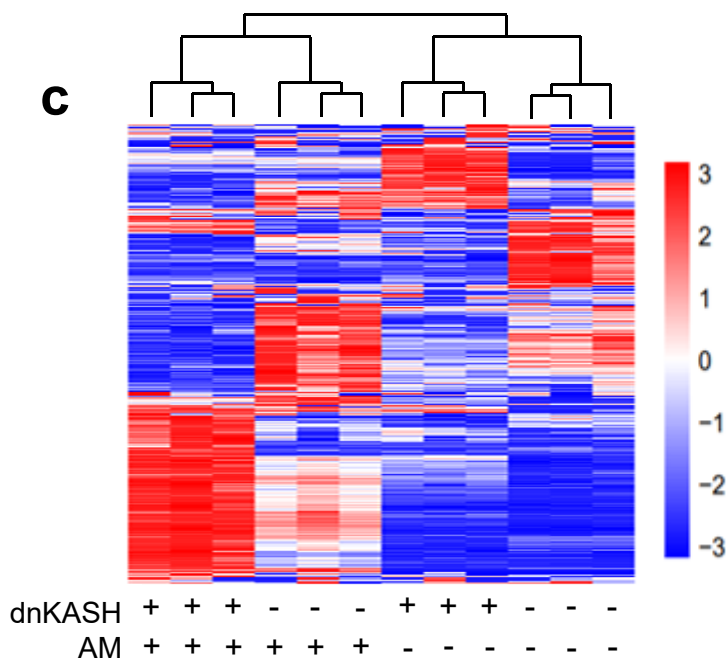

**d**

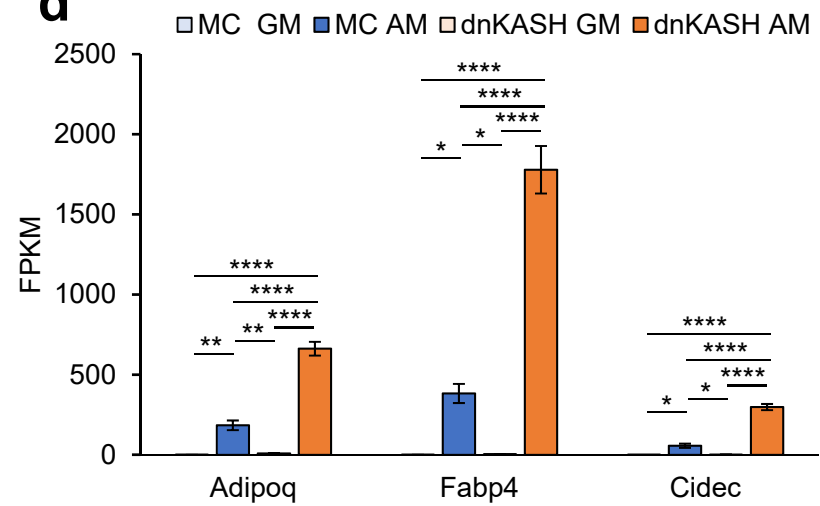

**Fig. S7: Validation of siSun and dnKASH Adipogenic Gene Expression.** **a** qPCR validation of *Adipoq* levels during growth in AM and siSun treatment. *Adipoq* expression decreased by 90% ( $n = 3$ ,  $P < 0.05$ ). **b** qPCR validation of *Adipoq* levels during growth in AM or AM+Dox media. *Adipoq* expression in dnKASH expressing MSCs had 4-fold increase of *Adipoq* expression ( $n = 3$ ,  $P < 0.05$ ). **c** Heatmap of MSCs transfected with secondary plasmid expressing dnKASH or empty vector (MC) during growth in GM or AM media. Genes selected had FPKM  $> 0.3$  and  $P < 0.05$  compared to controls. **d** FPKM levels of *Adipoq*, *Fabp4*, and *Cidec* during transfection with either dnKASH or MC in GM or AM media. *Adipoq*, *Fabp4*, and *Cidec* experienced increases of 280% ( $n = 3$ ,  $P < 0.0001$ ), 400% ( $n = 3$ ,  $P < 0.0001$ ), and 500% ( $n = 3$ ,  $P < 0.0001$ ), respectively, in FPKM levels between MC AM and dnKASH AM groups. qPCR validation of siSun and dnKASH Groups were compared using Two-Tailed Students T-Test. FPKM analysis of adipogenic genes *Adipoq*, *Fabp4*, and *Cidec* was done by One-Way Anova. \*  $P < 0.05$ , \*\*  $P < 0.01$ , \*\*\*  $P < 0.001$ , \*\*\*\*  $P < 0.0001$ .

**a**

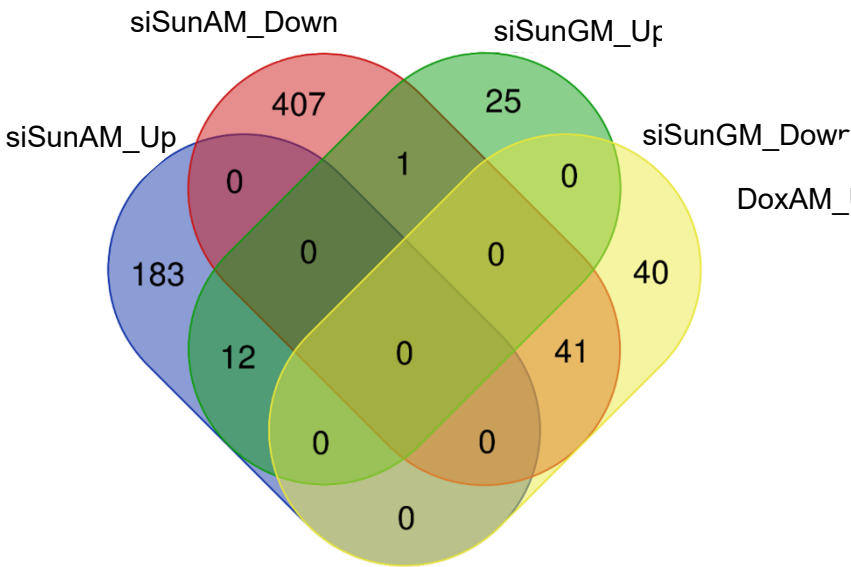

**b**

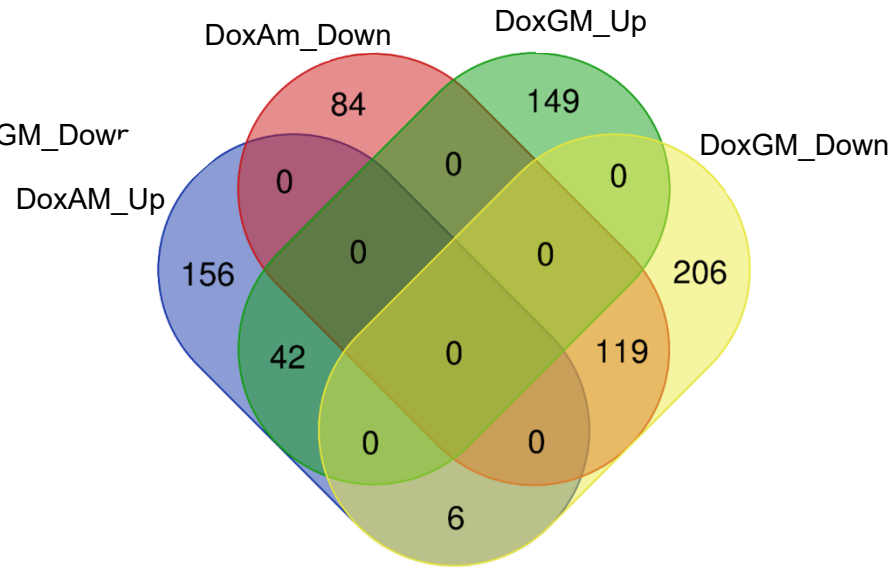

**c**

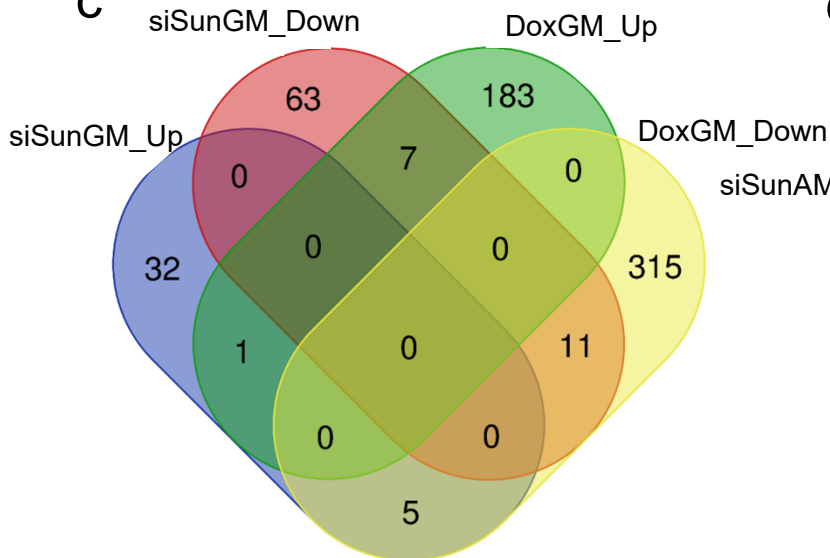

**d**

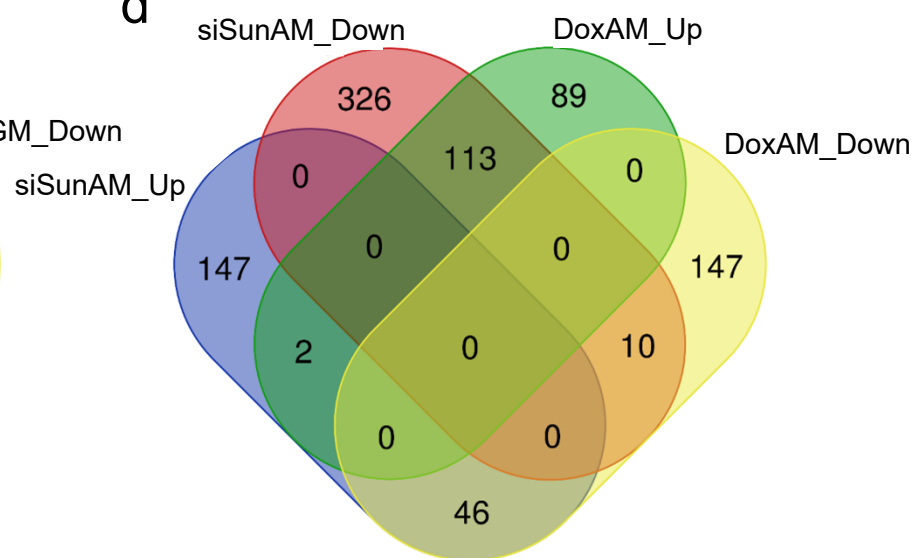

**Fig. S4: Venn Diagrams of RNA-Seq Analysis.** **a** Venn diagram depicting gene expression overlap for genes up or down regulated in siSun compared to siCntl during growth in GM or AM. **b** Venn diagram depicting gene expression overlap for genes up or down regulated in GM+Dox or AM+Dox compared to GM or AM respectively. **c** Comparison of siSun GM up and down regulated genes compared to siCntl GM and GM+Dox up and down regulated genes compared to GM. **d** Comparison of siSun AM up and down regulated genes compared to siCntl AM and AM+Dox up and down regulated genes compared to AM.

**Table S1. DAVID analysis of genes up regulated in siSun AM vs siCntl AM comparison.**

| Term                                            | PValue   | Genes                                                                                                                                                                                                                                                                                                                                     | FDR      |
|-------------------------------------------------|----------|-------------------------------------------------------------------------------------------------------------------------------------------------------------------------------------------------------------------------------------------------------------------------------------------------------------------------------------------|----------|
| Enrichment Score:<br>10.410501090574954         |          |                                                                                                                                                                                                                                                                                                                                           |          |
| GO:0005576~extracellular region                 | 6.54E-13 | ADM, CXCL1, CPZ, WISP1, CXCL5, FCNA, NPPC, PRL2C3, PLAU, CASP4, LEPR, COL10A1, OLR1, IL13RA2, CCBE1, IL11, WNT5B, ANG2, COL23A1, NRG1, PGF, DCN, EREG, MMP11, SLPI, COL6A4, FAM20C, APOL7A, CEMIP, LAMA2, SEMA3C, SAA3, DPT, THBS2, NTN1, PRRG4, CCL8, CCL7, CCL2, NLRP3, PLTP, FGF22, CTLA2A, ACE, BMP8A, LIF, INHBB, INHBA, CXCL10, IL6 | 1.16E-10 |
| GO:0005615~extracellular space                  | 6.37E-10 | SEMA3C, SAA3, DPT, ADM, CXCL1, CPZ, CST6, CXCL5, NPPC, SERPINB1B, PRL2C3, CCL8, SERPINA3F, CCL7, PLAU, ALOX5, LEPR, CCL2, SERPINB9B, PLTP, CCBE1, IL11, ACE, NOS2, WNT5B, COL23A1, BMP8A, LIF, INHBB, NRG1, INHBA, PGF, SERPINA3I, DCN, EREG, CXCL10, CES1A, IL6, PPFIBP2, SLPI, FAM20C                                                   | 5.67E-08 |
| Enrichment Score:<br>5.786565731582282          |          |                                                                                                                                                                                                                                                                                                                                           |          |
| GO:0008083~growth factor activity               | 8.07E-07 | IL11, IL6, PRL2C3, BMP8A, LIF, INHBB, CXCL1, INHBA, FGF22, PGF, EREG                                                                                                                                                                                                                                                                      | 2.66E-04 |
| GO:0005125~cytokine activity                    | 4.07E-06 | CXCL10, IL11, IL6, CCL8, CCL7, BMP8A, LIF, CCL2, INHBB, CXCL1, INHBA, CXCL5                                                                                                                                                                                                                                                               | 6.72E-04 |
| Enrichment Score:<br>3.036176147602188          |          |                                                                                                                                                                                                                                                                                                                                           |          |
| GO:0006954~inflammatory response                | 6.80E-07 | NOS2, TNFAIP3, CXCL1, CXCL5, CXCL10, IL6, CCL8, CCL7, ALOX5, CASP4, ZC3H12A, STAB1, NFKBIZ, CCL2, OLR1, NLRP3                                                                                                                                                                                                                             | 7.89E-04 |
| GO:0005125~cytokine activity                    | 4.07E-06 | CXCL10, IL11, IL6, CCL8, CCL7, BMP8A, LIF, CCL2, INHBB, CXCL1, INHBA, CXCL5                                                                                                                                                                                                                                                               | 6.72E-04 |
| GO:0070098~chemokine-mediated signaling pathway | 1.09E-05 | CXCL10, CCL8, CCL7, CCL2, ACKR3, CXCL1, CXCL5                                                                                                                                                                                                                                                                                             | 0.004225 |
| GO:0008009~chemokine activity                   | 7.15E-05 | CXCL10, CCL8, CCL7, CCL2, CXCL1, CXCL5                                                                                                                                                                                                                                                                                                    | 0.007866 |

**Table S2. DAVID analysis of genes down regulated in siSun AM vs siCntl AM comparison.**

| Term                                        | PValue      | Genes                                                                                                                                                                                                                                                                                                                                                                                                                                                                                                                                                                                                                                                                                                                                                                                                                                                                                                                                                                                                                                                                                                                                                                                                                                                                                                                                                                                                                                                                                                                                                   | FDR      |
|---------------------------------------------|-------------|---------------------------------------------------------------------------------------------------------------------------------------------------------------------------------------------------------------------------------------------------------------------------------------------------------------------------------------------------------------------------------------------------------------------------------------------------------------------------------------------------------------------------------------------------------------------------------------------------------------------------------------------------------------------------------------------------------------------------------------------------------------------------------------------------------------------------------------------------------------------------------------------------------------------------------------------------------------------------------------------------------------------------------------------------------------------------------------------------------------------------------------------------------------------------------------------------------------------------------------------------------------------------------------------------------------------------------------------------------------------------------------------------------------------------------------------------------------------------------------------------------------------------------------------------------|----------|
| Enrichment Score: 6.524333497927802         |             |                                                                                                                                                                                                                                                                                                                                                                                                                                                                                                                                                                                                                                                                                                                                                                                                                                                                                                                                                                                                                                                                                                                                                                                                                                                                                                                                                                                                                                                                                                                                                         |          |
| GO:0005615~extracellular space              | 2.35903E-06 | ORM1, COL14A1, TRF, FGF1, DMKN, PCSK4, C4B, THBD, NAT8F3, LIPE, LBP, CD36, EGFL7, WFDC21, IGFBP4, AHSG, RALGAP2, ADIPOQ, MMP3, MTUS1, CES4A, ALDH3A1, ACTA1, SFRP1, RBP4, TST, NRG4, KIT, SPARCL1, AMY1, GAS6, GPLD1, S100A8, CFD, COL15A1, LY2Z, SAA4, SEMA3G, STC1, RETN, C3, SERPINA3C, SELENBP1, HPX, AOC3, CAR2, S100B, GDF5, AGT, APLN, VNN1, CXCL12, LRG1, PPP1R1A, CES1D, VNN3, CES1F, LCN2, MDGA1, PF4                                                                                                                                                                                                                                                                                                                                                                                                                                                                                                                                                                                                                                                                                                                                                                                                                                                                                                                                                                                                                                                                                                                                         | 0.000131 |
| GO:0005576~extracellular region             | 0.000112746 | SNED1, ORM1, COL14A1, TRF, FGF1, DMKN, CHRDL1, WFDC3, C4B, ESM1, LBP, EGFL7, WFDC21, IGFBP4, AHSG, ADIPOQ, MMP3, IL17RE, OTOR, CES4A, FNDC5, SFRP1, RBP4, OLFM2, NRG4, SPARCL1, AMY1, IGFALS, GAS6, MATN4, GPLD1, S100A8, CFD, ITIH4, COL15A1, MEGF6, LY2Z, SAA4, SEMA3G, STC1, RETN, C3, SERPINA3C, HPX, PRRG1, APOF, LAMB3, RARRES2, APOC4, S100B, GDF5, KAZALD1, ABHD15, CXCL12, SMOCI, LCN2, SIGLEC1, IL17D, FGFR2, PF4, CBLN1                                                                                                                                                                                                                                                                                                                                                                                                                                                                                                                                                                                                                                                                                                                                                                                                                                                                                                                                                                                                                                                                                                                      | 0.003483 |
| Enrichment Score: 6.1042355089644165        |             |                                                                                                                                                                                                                                                                                                                                                                                                                                                                                                                                                                                                                                                                                                                                                                                                                                                                                                                                                                                                                                                                                                                                                                                                                                                                                                                                                                                                                                                                                                                                                         |          |
| GO:0006629~lipid metabolic process          | 1.32922E-11 | GAL3ST1, PCX, FAM57B, GDDP2, ACAA1B, CYP46A1, ADIPOR2, AGPAT2, SULT1A1, C3, HSD11B1, LIPE, HPGDS, FAM213B, SPTLC3, PMVK, APOF, SCD3, SCD1, PCK1, DGAT2, HMGCS1, ACSL1, FA2H, FABP5, CES1D, FASN, NAAA, PNPLA3, ECHDC2, THRSP, CHPT1, PLIN1, PPARA, PLCB2, MGLL, PNPLA2                                                                                                                                                                                                                                                                                                                                                                                                                                                                                                                                                                                                                                                                                                                                                                                                                                                                                                                                                                                                                                                                                                                                                                                                                                                                                  | 1.33E-08 |
| GO:0006631~fatty acid metabolic process     | 2.07319E-07 | ACSL1, ACAA1B, ADIPOR2, C3, FA2H, HPGDS, FAM213B, FABP4, PRKAR2B, UCP3, FASN, SCD3, ECHDC2, CD36, SCD1, PPARA, MGLL                                                                                                                                                                                                                                                                                                                                                                                                                                                                                                                                                                                                                                                                                                                                                                                                                                                                                                                                                                                                                                                                                                                                                                                                                                                                                                                                                                                                                                     | 0.000104 |
| Enrichment Score: 5.559184156465526         |             |                                                                                                                                                                                                                                                                                                                                                                                                                                                                                                                                                                                                                                                                                                                                                                                                                                                                                                                                                                                                                                                                                                                                                                                                                                                                                                                                                                                                                                                                                                                                                         |          |
| GO:0004364~glutathione transferase activity | 4.84182E-06 | GSTK1, HPGDS, GSTA4, GSTA3, MGST3, MGST1, MGST2, GDAP1                                                                                                                                                                                                                                                                                                                                                                                                                                                                                                                                                                                                                                                                                                                                                                                                                                                                                                                                                                                                                                                                                                                                                                                                                                                                                                                                                                                                                                                                                                  | 0.003162 |
| Enrichment Score: 5.054084638725923         |             |                                                                                                                                                                                                                                                                                                                                                                                                                                                                                                                                                                                                                                                                                                                                                                                                                                                                                                                                                                                                                                                                                                                                                                                                                                                                                                                                                                                                                                                                                                                                                         |          |
| GO:0016020~membrane                         | 2.48959E-08 | CLEC10A, AQP7, KLHDC7A, FGFRL1, ZFYVE28, LIPE, SCP2, CYP2C70, GBP6, PAQR9, GSTK1, PAQR4, UNC5A, ACSL1, MTUS1, MCEMP1, MFSD12, GBGT1, TMEM82, FNDC5, SLC5A6, STX1B, RNF125, KCNQ4, PLPP3, SLC22A4, SLC22A3, ADCYAP1R1, MGST3, MGST1, APCDD1, PPL, SLC5A3, HSD11B1, MC2R, PRKAR2B, KCNN1, RHBDL3, FZD3, FZD4, ABCA9, SLC16A10, GDF5, FA2H, VNN1, VNN3, FASN, FXYP1, HIST1H4H, TMCC3, IFI27L2A, A530016L24RIK, FAM57B, TMEM182, PCSK4, RYR3, PHEX, VSIR, PANX2, SPTLC3, B3GALT2, SLC22A18, TMED3, FFAR4, SCD3, FFAR2, CD36, SCD1, SLC18A1, ADIG, COX8B, CHST7, IL17RE, TMEM179, ADRB3, KCNMA1, KIT, PLIN4, TLR8, RGR, SLC22A20, MGLL, PLPPR3, PTGER3, TXLNG, GDDP2, FITM2, ADCY8, BEGAIN, ADCY5, UCP3, CYP2F2, PEX16, AOC3, CAR2, SORT1, SCTR, FMO1, SORBS1, LHFPL1, MC5R, PNPLA3, SIGLEC1, PNPLA2, KLB, SCARB1, CLSTN3, CYP46A1, CELSR3, MPC2, ADORA1, SLC16A9, SLC16A2, DGAT2, SLC15A2, DGAT1, CD93, ABCA8A, SEMA6D, DIO3, OLFM2, ADAM12, LY6H, PDE9A, DSC2, S100A8, RTN4R, RASGRP2, ADIPOR2, ALDH3B3, HCAR2, HCAR1, PMVK, CD300LG, TMEM120B, OPN3, BTN2A2, CAV2, TMEM120A, GFAP, ABHD15, PXMP2, PXMP4, REEP6, FGFR3, FGFR2, TMEM45B, ABCD2, GAL3ST1, TRF, SLC2A4, TSPAN12, RERG, THBD, CD1D1, SGCD, HEPH, GPER1, ADGRE4, LBP, SUN2, SUN1, SVOP, SLC36A2, ITGA1, ARL4A, ITGAD, IRF4, NRG4, ITGA7, ITGA6, SLC25A10, NAT8L, CAMK1G, H2-Q6, H2-Q7, ATP1A2, AGPAT2, SELENBP1, CNM1, RAB40B, RASD1, TMEM205, LRRC8D, RILP, SH2B2, NOS3, KCNIP3, SPRY4, ATP2B4, C130074G19RIK, GDAP1, TSHR, P2RX6, CHPT1, GPD1L, PIK3AP1, SLC25A34, MDGA1, KCNK3, SNTB1, CBLN1 | 6.92E-06 |
| GO:0016021~integral component of membrane   | 0.002647796 | KLB, SCARB1, GM5460, CLSTN3, CLEC10A, AQP7, KLHDC7A, ARXES2, ARXES1, CYP46A1, CELSR3, FGFRL1, MFSD13B, MPC2, ADORA1, SLC16A9, SLC16A2, PAQR9, SLC15A2, DGAT2, DGAT1, ENTPD3, CD93, ABCA8A, UNC5A, PAQR4, ACSL1, SEMA6D, MTUS1, DIO3, MCEMP1, MFSD12, GBGT1, TMEM82, FNDC5, SLC5A6, ALDH3A1, STX1B, SFRP1, ADAM12, KCNQ4, PLPP3, DSC2, SLC22A4, SLC22A3, ADCYAP1R1, MGST3, MGST1, MGST2, APCDD1, ADIPOR2, SLC5A3, HSD11B1, HCAR2, MC2R, HCAR1, KCNN1, RHBDL3, CD300LG, TMEM120B, FZD3, OPN3, BTN2A2, FZD4, CAV2, TMEM120A, ABCA9, SLC16A10, FA2H, VNN1, PXMP2, FXYP1, TMCC3, PXMP4, REEP6, IFI27L2A, FGFR3, FGFR2, TMEM45B, ABCD2, GAL3ST1, A530016L24RIK, FAM57B, TMEM182, SLC2A4, TSPAN12, VSIR, RYR3, PHEX, THBD, PANX2, NAT8F3, CD1D1, SGCD, HEPH, SPTLC3, GPER1, SLC22A18, B3GALT2, ADGRE4, TMED3, FFAR4, SCD3, FFAR2, SCD1, CD36, SLC18A1, ADIG, SUN2, NXPE5, SUN1, SLC36A2, SLC13A4, SVOP, COX8B, CHST7, GM10134, ITGA1, IL17RE, UGT1A6B, TMEM179, ADRB3, ITGAD, NRG4, KCNMA1, KIT, ITGA7, TLR8, ITGA6, SLC25A10, NAT8L, RGR, SLC22A20, PLPPR3, H2-Q6, PTGER3, H2-Q7, GDDP2, ATP1A2, FITM2, LRP3, ADCY8, AGPAT2, ADCY5, CNM1, TMEM205, UCP3, PRRG1, VMN2R57, LRRC8D, GPR155, PEX16, AOC3, POLN, SORT1, ATP2B4, C130074G19RIK, SCTR, GOS2, FMO1, LHFPL1, FAM213A, GDAP1, TSHR, P2RX6, MC5R, PNPLA3, GM11127, CHPT1, SIGLEC1, SLC25A34, KCNK3, PNPLA2                                                                                                                                                                                               | 0.043299 |
| Enrichment Score: 4.400392717334829         |             |                                                                                                                                                                                                                                                                                                                                                                                                                                                                                                                                                                                                                                                                                                                                                                                                                                                                                                                                                                                                                                                                                                                                                                                                                                                                                                                                                                                                                                                                                                                                                         |          |
| GO:0005783~endoplasmic reticulum            | 9.42399E-07 | CLSTN3, FAM57B, ARXES2, ARXES1, CYP46A1, RYR3, PHEX, NAT8F3, SCP2, SPTLC3, GPER1, ADORA1, TMED3, SCD3, SCD1, CYP2C70, CD36, MAP3K5, DGAT2, DGAT1, ACSL1, ADIPOQ, UGT1A6B, FNDC5, ALDH3A1, KCNMA1, PLIN1, PLPP3, NAT8L, PDE9A, RTN4R, MGST3, H2-Q6, H2-Q7, MGST1, OAS1A, MGST2, FITM2, AGPAT2, HSD11B1, FAM213B, LRRC8D, CYP2F2, PEX16, AOC3, SORT1, CAV2, KCNIP3, FMO1, CIDEA, FA2H, CES1D, CES1F, ACO1, REEP6, FGFR3                                                                                                                                                                                                                                                                                                                                                                                                                                                                                                                                                                                                                                                                                                                                                                                                                                                                                                                                                                                                                                                                                                                                   | 7.7E-05  |
| Enrichment Score: 3.786951718342054         |             |                                                                                                                                                                                                                                                                                                                                                                                                                                                                                                                                                                                                                                                                                                                                                                                                                                                                                                                                                                                                                                                                                                                                                                                                                                                                                                                                                                                                                                                                                                                                                         |          |
| GO:0016829~lyase activity                   | 4.11812E-05 | CAR3, CAR2, CAR1, THA1, ADCY8, ADCY5, CAR5B, FASN, ECHDC1, ECHDC2, ACO1, PCK1, GLUL                                                                                                                                                                                                                                                                                                                                                                                                                                                                                                                                                                                                                                                                                                                                                                                                                                                                                                                                                                                                                                                                                                                                                                                                                                                                                                                                                                                                                                                                     | 0.013446 |
| Enrichment Score: 3.677802891089701         |             |                                                                                                                                                                                                                                                                                                                                                                                                                                                                                                                                                                                                                                                                                                                                                                                                                                                                                                                                                                                                                                                                                                                                                                                                                                                                                                                                                                                                                                                                                                                                                         |          |
| GO:0016491~oxidoreductase activity          | 0.000230652 | CYP46A1, DHTKD1, PRDX3, ALDH3B3, HSD11B1, ALDH3B2, ADH1, FAM213B, HEPH, SCD3, SCD1, CYP2F2, CYP2C70, PRODH, AOC3, NOS3, ADHFE1, DIO3, FMO1, HPDL, ALDH3A1, FA2H, ALDH6A1, FASN, GPD1, GPD1L, CDO1, ALDH1A7                                                                                                                                                                                                                                                                                                                                                                                                                                                                                                                                                                                                                                                                                                                                                                                                                                                                                                                                                                                                                                                                                                                                                                                                                                                                                                                                              | 0.037654 |
| Enrichment Score: 2.958793657193554         |             |                                                                                                                                                                                                                                                                                                                                                                                                                                                                                                                                                                                                                                                                                                                                                                                                                                                                                                                                                                                                                                                                                                                                                                                                                                                                                                                                                                                                                                                                                                                                                         |          |
| GO:0005811~lipid particle                   | 1.10822E-06 | ALDH3B2, LIPE, DGAT2, CES1D, CAV2, CES1F, PNPLA3, PLIN4, PLIN1, CIDEA, PNPLA2                                                                                                                                                                                                                                                                                                                                                                                                                                                                                                                                                                                                                                                                                                                                                                                                                                                                                                                                                                                                                                                                                                                                                                                                                                                                                                                                                                                                                                                                           | 7.7E-05  |
| Enrichment Score: 2.9194437076370603        |             |                                                                                                                                                                                                                                                                                                                                                                                                                                                                                                                                                                                                                                                                                                                                                                                                                                                                                                                                                                                                                                                                                                                                                                                                                                                                                                                                                                                                                                                                                                                                                         |          |
| GO:0005778~peroxisomal membrane             | 0.000825684 | FNDC5, PEX16, ABCD2, ACSL1, PXMP2, MGST1, PXMP4                                                                                                                                                                                                                                                                                                                                                                                                                                                                                                                                                                                                                                                                                                                                                                                                                                                                                                                                                                                                                                                                                                                                                                                                                                                                                                                                                                                                                                                                                                         | 0.015871 |
| GO:0005777~peroxisome                       | 0.001811594 | FNDC5, PEX16, GSTK1, ABCD2, SCP2, ACSL1, PXMP2, PMVK, PXMP4, ACAA1B                                                                                                                                                                                                                                                                                                                                                                                                                                                                                                                                                                                                                                                                                                                                                                                                                                                                                                                                                                                                                                                                                                                                                                                                                                                                                                                                                                                                                                                                                     | 0.031476 |
| Enrichment Score: 2.783046834549974         |             |                                                                                                                                                                                                                                                                                                                                                                                                                                                                                                                                                                                                                                                                                                                                                                                                                                                                                                                                                                                                                                                                                                                                                                                                                                                                                                                                                                                                                                                                                                                                                         |          |
| GO:0004364~glutathione transferase activity | 4.84182E-06 | GSTK1, HPGDS, GSTA4, GSTA3, MGST3, MGST1, MGST2, GDAP1                                                                                                                                                                                                                                                                                                                                                                                                                                                                                                                                                                                                                                                                                                                                                                                                                                                                                                                                                                                                                                                                                                                                                                                                                                                                                                                                                                                                                                                                                                  | 0.003162 |
| Enrichment Score: 1.9621782871517306        |             |                                                                                                                                                                                                                                                                                                                                                                                                                                                                                                                                                                                                                                                                                                                                                                                                                                                                                                                                                                                                                                                                                                                                                                                                                                                                                                                                                                                                                                                                                                                                                         |          |
| GO:0004364~glutathione transferase activity | 4.84182E-06 | GSTK1, HPGDS, GSTA4, GSTA3, MGST3, MGST1, MGST2, GDAP1                                                                                                                                                                                                                                                                                                                                                                                                                                                                                                                                                                                                                                                                                                                                                                                                                                                                                                                                                                                                                                                                                                                                                                                                                                                                                                                                                                                                                                                                                                  | 0.003162 |
| Enrichment Score: 0.7843121871123002        |             |                                                                                                                                                                                                                                                                                                                                                                                                                                                                                                                                                                                                                                                                                                                                                                                                                                                                                                                                                                                                                                                                                                                                                                                                                                                                                                                                                                                                                                                                                                                                                         |          |
| GO:0031090~organelle membrane               | 0.000160598 | FA2H, MGST3, SCD3, FMO1, ARXES2, CYP2F2, SCD1, ARXES1, CYP2C70, CYP46A1                                                                                                                                                                                                                                                                                                                                                                                                                                                                                                                                                                                                                                                                                                                                                                                                                                                                                                                                                                                                                                                                                                                                                                                                                                                                                                                                                                                                                                                                                 | 0.004189 |

Table S9: GSEA analysis of genes up-regulated in Advs vs Adv-Box comparison

| Term                                          | PValue   | Genes                                                                                                                                                                                                                                                                                                                                                                                                                                                                                                                                                                                                                                                                                | FDR      |
|-----------------------------------------------|----------|--------------------------------------------------------------------------------------------------------------------------------------------------------------------------------------------------------------------------------------------------------------------------------------------------------------------------------------------------------------------------------------------------------------------------------------------------------------------------------------------------------------------------------------------------------------------------------------------------------------------------------------------------------------------------------------|----------|
| Enrichment Score: 5.164491013153225           |          |                                                                                                                                                                                                                                                                                                                                                                                                                                                                                                                                                                                                                                                                                      |          |
| GO:0005576~extracellular region               | 1.55E-05 | ITIH4, CALCA, ORM1, TNXB, LAMA2, NXPH3, LAMA3, TRF, PRELP, PTN, RETN, CXCL14, CHRDL1, TMEM25, ISLR, ADGRG1, PDZD2, HYAL3, LAMB3, FST, ADIPOQ, IL17RE, S100B, GDF5, DCN, ABHD15, MFAP4, RBP4, OLFM2, CRISPLD1, CRISPLD2, SMOC1, APOC1, VWA1, SIGLEC1, GPLD1                                                                                                                                                                                                                                                                                                                                                                                                                           | 0.00267  |
| Enrichment Score: 3.6014436708635866          |          |                                                                                                                                                                                                                                                                                                                                                                                                                                                                                                                                                                                                                                                                                      |          |
| mmu03320:PPAR signaling pathway               | 3.36E-08 | FABP4, FABP5, ACSL1, ADIPOQ, SCD3, AQP7, ACAA1B, PLIN1, SCD1, CD36, PCK1                                                                                                                                                                                                                                                                                                                                                                                                                                                                                                                                                                                                             | 4.26E-06 |
| GO:0006629~lipid metabolic process            | 5.74E-07 | TNXB, DGAT2, HPGD, ACSL1, EPHX2, ACAA1B, CYP46A1, AGPAT2, SULT1A1, LIPE, HPGDS, FABP5, SPTLC3, SCD3, PLIN1, PLCH2, SCD1, PCK1, MGLL                                                                                                                                                                                                                                                                                                                                                                                                                                                                                                                                                  | 4.48E-04 |
| GO:0006631~fatty acid metabolic process       | 2.24E-05 | HPGDS, TNXB, FABP4, HPGD, ACSL1, SCD3, ACAA1B, SCD1, CD36, MGLL                                                                                                                                                                                                                                                                                                                                                                                                                                                                                                                                                                                                                      | 0.007989 |
| Enrichment Score: 2.6399772091369966          |          |                                                                                                                                                                                                                                                                                                                                                                                                                                                                                                                                                                                                                                                                                      |          |
| GO:0005783~endoplasmic reticulum              | 6.70E-04 | MOXD1, CALR3, MGST2, ATP10B, ARXES2, PTN, ARXES1, CYP46A1, AGPAT2, PDZD2, SPTLC3, SCD3, LRRC8D, CD36, SCD1, MEST, DGAT2, ACSL1, SORT1, ADIPOQ, FMO2, CIDEC, APOC1, PLIN1, REEP6, NAT8L                                                                                                                                                                                                                                                                                                                                                                                                                                                                                               | 0.028823 |
| Enrichment Score: 2.591431031118175           |          |                                                                                                                                                                                                                                                                                                                                                                                                                                                                                                                                                                                                                                                                                      |          |
| GO:0016020~membrane                           | 8.58E-04 | KLB, MOXD1, A530016L24RIK, TENM4, DOCK8, SLC40A1, TRF, AQP7, CIB2, TMEM182, KLHDC7A, SLC2A4, CYP46A1, LIPE, SPTLC3, B3GALT2, SCD3, FFAR2, SCD1, CD36, GAL3ST2, PAQR9, TMEM88B, SEMA6A, SLC36A2, DGAT2, ABCA8A, ACSL1, SEMA6D, MTUS1, IL17RE, CBFA2T3, GBGT1, STX1B, TMEFF2, TMEM179, ARC, OLFM2, ADRB3, ITGAD, ADGRB2, RGS9BP, ADAM12, MYZAP, NAT8L, GPRC5C, MGLL, ADCYAP1R1, C5AR2, PTGER3, GPR88, WNK4, SLC3A1, ATP1A2, PTN, APCDD1, AGPAT2, TMEM25, SELENBP1, ADGRG1, MC2R, RAB40B, HCAR1, UCP2, LRRC8D, NCAM1, MEST, CD300LG, CAR2, SORT1, MCAM, PTCH2, C130074G19RIK, SCTR, FMO2, GDF5, TSHR, ABHD15, TRPV4, FXD1, TMCC3, SLC26A7, SIGLEC1, PLCH2, REEP6, SLC25A34, CD68, KCNK3 | 0.029507 |
| Enrichment Score: 2.1409380701327043          |          |                                                                                                                                                                                                                                                                                                                                                                                                                                                                                                                                                                                                                                                                                      |          |
| mmu04152:AMPK signaling pathway               | 8.68E-04 | LIPE, PFKFB3, ADIPOQ, SCD3, SLC2A4, SCD1, CD36, PCK1                                                                                                                                                                                                                                                                                                                                                                                                                                                                                                                                                                                                                                 | 0.036734 |
| Enrichment Score: 1.7324571669713142          |          |                                                                                                                                                                                                                                                                                                                                                                                                                                                                                                                                                                                                                                                                                      |          |
| GO:0005578~proteinaceous extracellular matrix | 2.09E-04 | MFAP4, TNXB, LAMA2, LAMB3, CRISPLD2, SMOC1, LAMA3, VWA1, PRELP, PTN, GPLD1, DCN                                                                                                                                                                                                                                                                                                                                                                                                                                                                                                                                                                                                      | 0.017839 |
| GO:0005604~basement membrane                  | 3.11E-04 | LAMA2, LAMB3, SMOC1, LAMA3, VWA1, TRF, PTN                                                                                                                                                                                                                                                                                                                                                                                                                                                                                                                                                                                                                                           | 0.017839 |



Table S4. DAVID analysis of genes downregulated in AMVs vs AM+Dox comparison

| Term                                                    | PValue                 | Genes                                                                                                                                                                                                                                                                                                                                                                                                                                 | FDR                    |
|---------------------------------------------------------|------------------------|---------------------------------------------------------------------------------------------------------------------------------------------------------------------------------------------------------------------------------------------------------------------------------------------------------------------------------------------------------------------------------------------------------------------------------------|------------------------|
| Enrichment Score: 16.442538003224215                    |                        |                                                                                                                                                                                                                                                                                                                                                                                                                                       |                        |
| Term                                                    | PValue                 | Genes                                                                                                                                                                                                                                                                                                                                                                                                                                 | FDR                    |
| GO:0005615~extracellular space                          | 1.6417017461634274E-21 | TINAGL1, SERPINE1, HP, LAMC2, CXCL1, VLDLR, CLU, CXCL5, WISP2, SPN, C4B, LGALS3, FGF7, TIMP3, CAR6, LMCD1, CAMP, CCBE1, EDN1, VWF, GPX3, MMP3, MMP8, EREG, BCAN, MMP13, SLPI, OAS3, FAM20C, ACPP, SAA3, SAA4, TNFRSF11B, LTBP2, LRP8, KNG1, RNASET2A, C3, SERPINB1B, SERPINA3F, CCL7, PTPRZ1, STC2, CCL2, SERPINB9B, NOS2, TNFRSF9, LIF, SERPINA3M, SERPINA3N, SERPINA3G, CP, SERPINA3I, CXCL10, IL6, GDNF, CES1G, CLEC2G, LCN2, PTX3 | 3.2013184050186834E-19 |
| GO:0005576~extracellular region                         | 5.692614007016396E-17  | TINAGL1, SERPINE1, HP, F13A1, LAMC2, CXCL1, ISM1, CLU, CXCL5, WISP2, C4B, LGALS3, FGF7, CASP4, TIMP3, CAR6, CAMP, CCBE1, EDN1, VWF, GPX3, MMP3, MMP8, MMP10, EREG, MMP12, BCAN, MMP13, SLPI, ANGPTL6, FAM20C, VSTM2A, ACPP, SAA3, SAA4, TNFRSF11B, LTBP2, NTN1, LRP8, KNG1, 5430419D17RIK, C3, CCL7, PTPRZ1, STC2, CCL2, CDSN, LIF, SERPINA3M, SERPINA3N, CP, CXCL10, IL6, GDNF, LCN2, PTX3, NOTUM, HPSE                              | 5.5502986568409865E-15 |
| Enrichment Score: 4.585972071952109                     |                        |                                                                                                                                                                                                                                                                                                                                                                                                                                       |                        |
| Term                                                    | PValue                 | Genes                                                                                                                                                                                                                                                                                                                                                                                                                                 | FDR                    |
| GO:0034097~response to cytokine                         | 1.8576718254593303E-5  | SERPINA3F, SERPINA3M, SERPINA3N, PTGS2, SERPINA3G, OSMR, SERPINA3I, RELB                                                                                                                                                                                                                                                                                                                                                              | 0.004102358614556021   |
| GO:0010466~negative regulation of peptidase activity    | 2.6176895538567044E-5  | SERPINB1B, SERPINA3F, SLPI, SERPINE1, TIMP3, SERPINA3M, SERPINA3N, SERPINA3G, KNG1                                                                                                                                                                                                                                                                                                                                                    | 0.004336764545185795   |
| GO:0004867~serine-type endopeptidase inhibitor activity | 3.239574315699336E-5   | SERPINB1B, SERPINA3F, SLPI, SERPINE1, SERPINB9B, SERPINA3M, SERPINA3N, SERPINA3G, SERPINA3I                                                                                                                                                                                                                                                                                                                                           | 0.006398159273506189   |
| GO:0030414~peptidase inhibitor activity                 | 3.239574315699336E-5   | SERPINB1B, SERPINA3F, SLPI, SERPINE1, TIMP3, SERPINA3M, SERPINA3N, SERPINA3G, KNG1                                                                                                                                                                                                                                                                                                                                                    | 0.006398159273506189   |
| GO:0043434~response to peptide hormone                  | 9.897662481969958E-5   | SERPINA3F, STC2, SERPINA3M, SERPINA3N, SERPINA3G, SERPINA3I, EREG                                                                                                                                                                                                                                                                                                                                                                     | 0.013114402788610195   |
| Enrichment Score: 4.127262509244919                     |                        |                                                                                                                                                                                                                                                                                                                                                                                                                                       |                        |
| Term                                                    | PValue                 | Genes                                                                                                                                                                                                                                                                                                                                                                                                                                 | FDR                    |
| GO:0071347~cellular response to interleukin-1           | 1.531896347360444E-6   | IL6, EDN1, CCL7, SAA3, ZC3H12A, SERPINE1, LCN2, CCL2, CAMP                                                                                                                                                                                                                                                                                                                                                                            | 6.765875534175294E-4   |
| GO:0071222~cellular response to lipopolysaccharide      | 2.966452906842876E-4   | CXCL10, IL6, PLSCR1, NOS2, PLSCR2, ZC3H12A, SERPINE1, LCN2, CCL2, CAMP                                                                                                                                                                                                                                                                                                                                                                | 0.03275458417972343    |
| Enrichment Score: 3.2278474521875653                    |                        |                                                                                                                                                                                                                                                                                                                                                                                                                                       |                        |
| Term                                                    | PValue                 | Genes                                                                                                                                                                                                                                                                                                                                                                                                                                 | FDR                    |
| GO:0002376~immune system process                        | 1.5545629792378633E-4  | CD74, H2-Q7, H2-K1, HP, AHR, SERPINA3G, C3, LGALS3, SLPI, OAS3, CASP4, ZC3H12A, LCN2, TLR2                                                                                                                                                                                                                                                                                                                                            | 0.01872541770445608    |
| Enrichment Score: 3.0652006117499124                    |                        |                                                                                                                                                                                                                                                                                                                                                                                                                                       |                        |
| Term                                                    | PValue                 | Genes                                                                                                                                                                                                                                                                                                                                                                                                                                 | FDR                    |
| GO:0005578~proteinaceous extracellular matrix           | 7.86993046157755E-8    | CCBE1, VWF, MMP3, LTBP2, LAMC2, TNFRSF11B, MMP8, NTN1, MMP10, WISP2, MMP12, BCAN, LGALS3, MMP13, PTPRZ1, TIMP3, HPSE                                                                                                                                                                                                                                                                                                                  | 5.1154548000254075E-6  |
| GO:0031012~extracellular matrix                         | 1.0904983267609749E-6  | TINAGL1, VWF, SERPINE1, MMP3, LTBP2, MMP8, CLU, MMP10, MMP12, LGALS3, PLSCR1, MMP13, SLPI, TIMP3, LMCD1                                                                                                                                                                                                                                                                                                                               | 5.100221264313128E-5   |
| Enrichment Score: 2.605301978949154                     |                        |                                                                                                                                                                                                                                                                                                                                                                                                                                       |                        |
| Term                                                    | PValue                 | Genes                                                                                                                                                                                                                                                                                                                                                                                                                                 | FDR                    |
| GO:0006955~immune response                              | 1.9461300459952305E-8  | CD74, TINAGL1, TNFRSF9, H2-K1, LIF, CXCL1, TNFRSF11B, CXCL5, CXCL10, IL6, PLSCR1, CCL7, SLPI, OAS3, CCL2, SH2D6, TLR2                                                                                                                                                                                                                                                                                                                 | 1.2893111554718401E-5  |

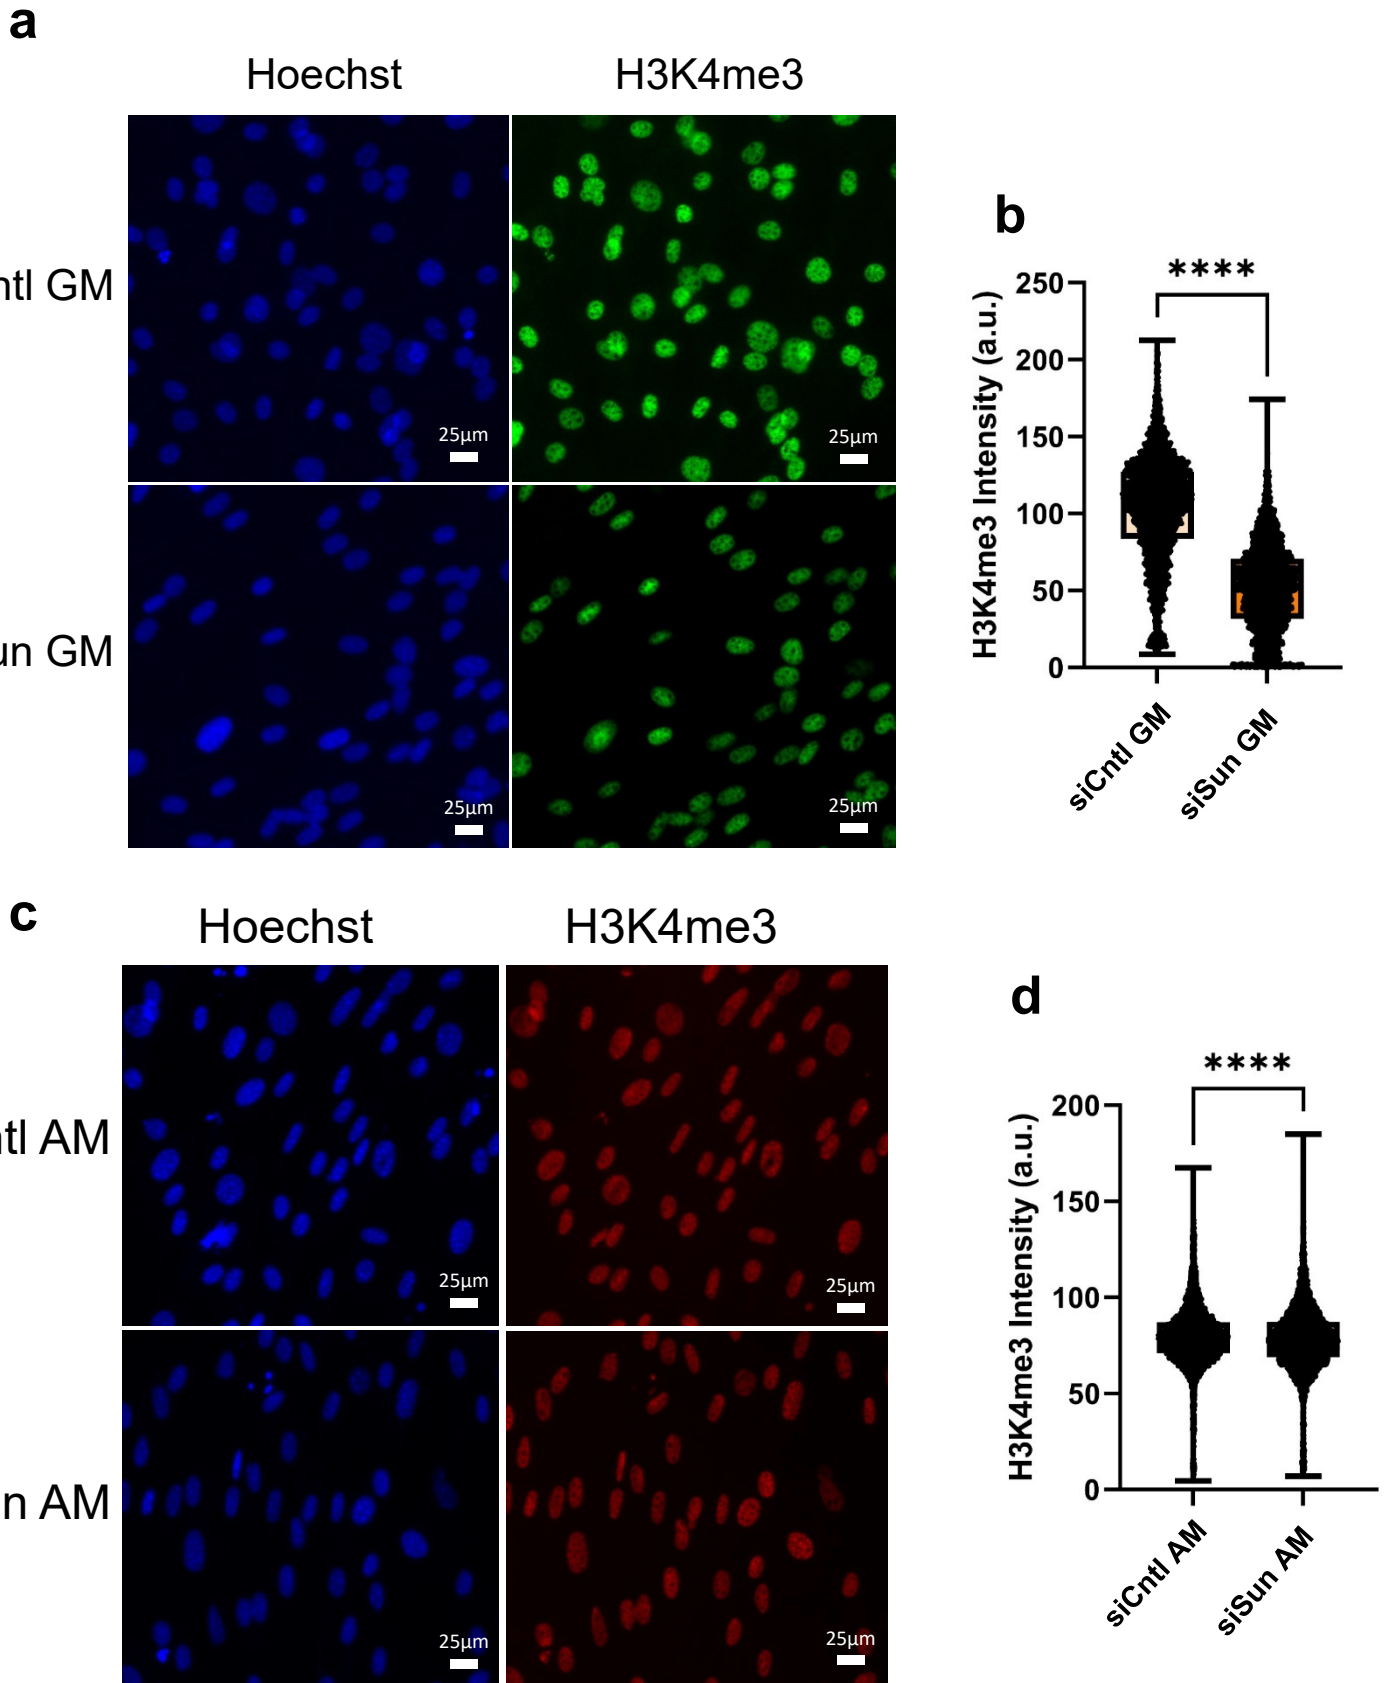

**Fig. S9: Image Analysis of H3K4me3 in MSCs during treatment of siSun or siCntl.** **a** Representative fluorescent images of Nuclei (Hoechst) and H3K4me3 (green) in siSun and siCntl treated MSCs grown in GM. **b** Analysis of fluorescence intensity for H3K4me3 shows 56% reduction of H3K4me3 intensity in siSun GM compared to siCntl GM (n = 2400, P < 0.0001). **c** Representative images of nuclei (Hoechst) and H3K4me3 (red) of siSun AM vs siCntl AM. **d** Analysis of H3K4me3 intensity. H3K4me3 intensity decreased by 2% in siSun AM compared to siCntl AM (n = 2500, P < 0.0001). Group analysis was made using Two-Tailed Students T-Test. \*\*\*\* P < 0.0001.



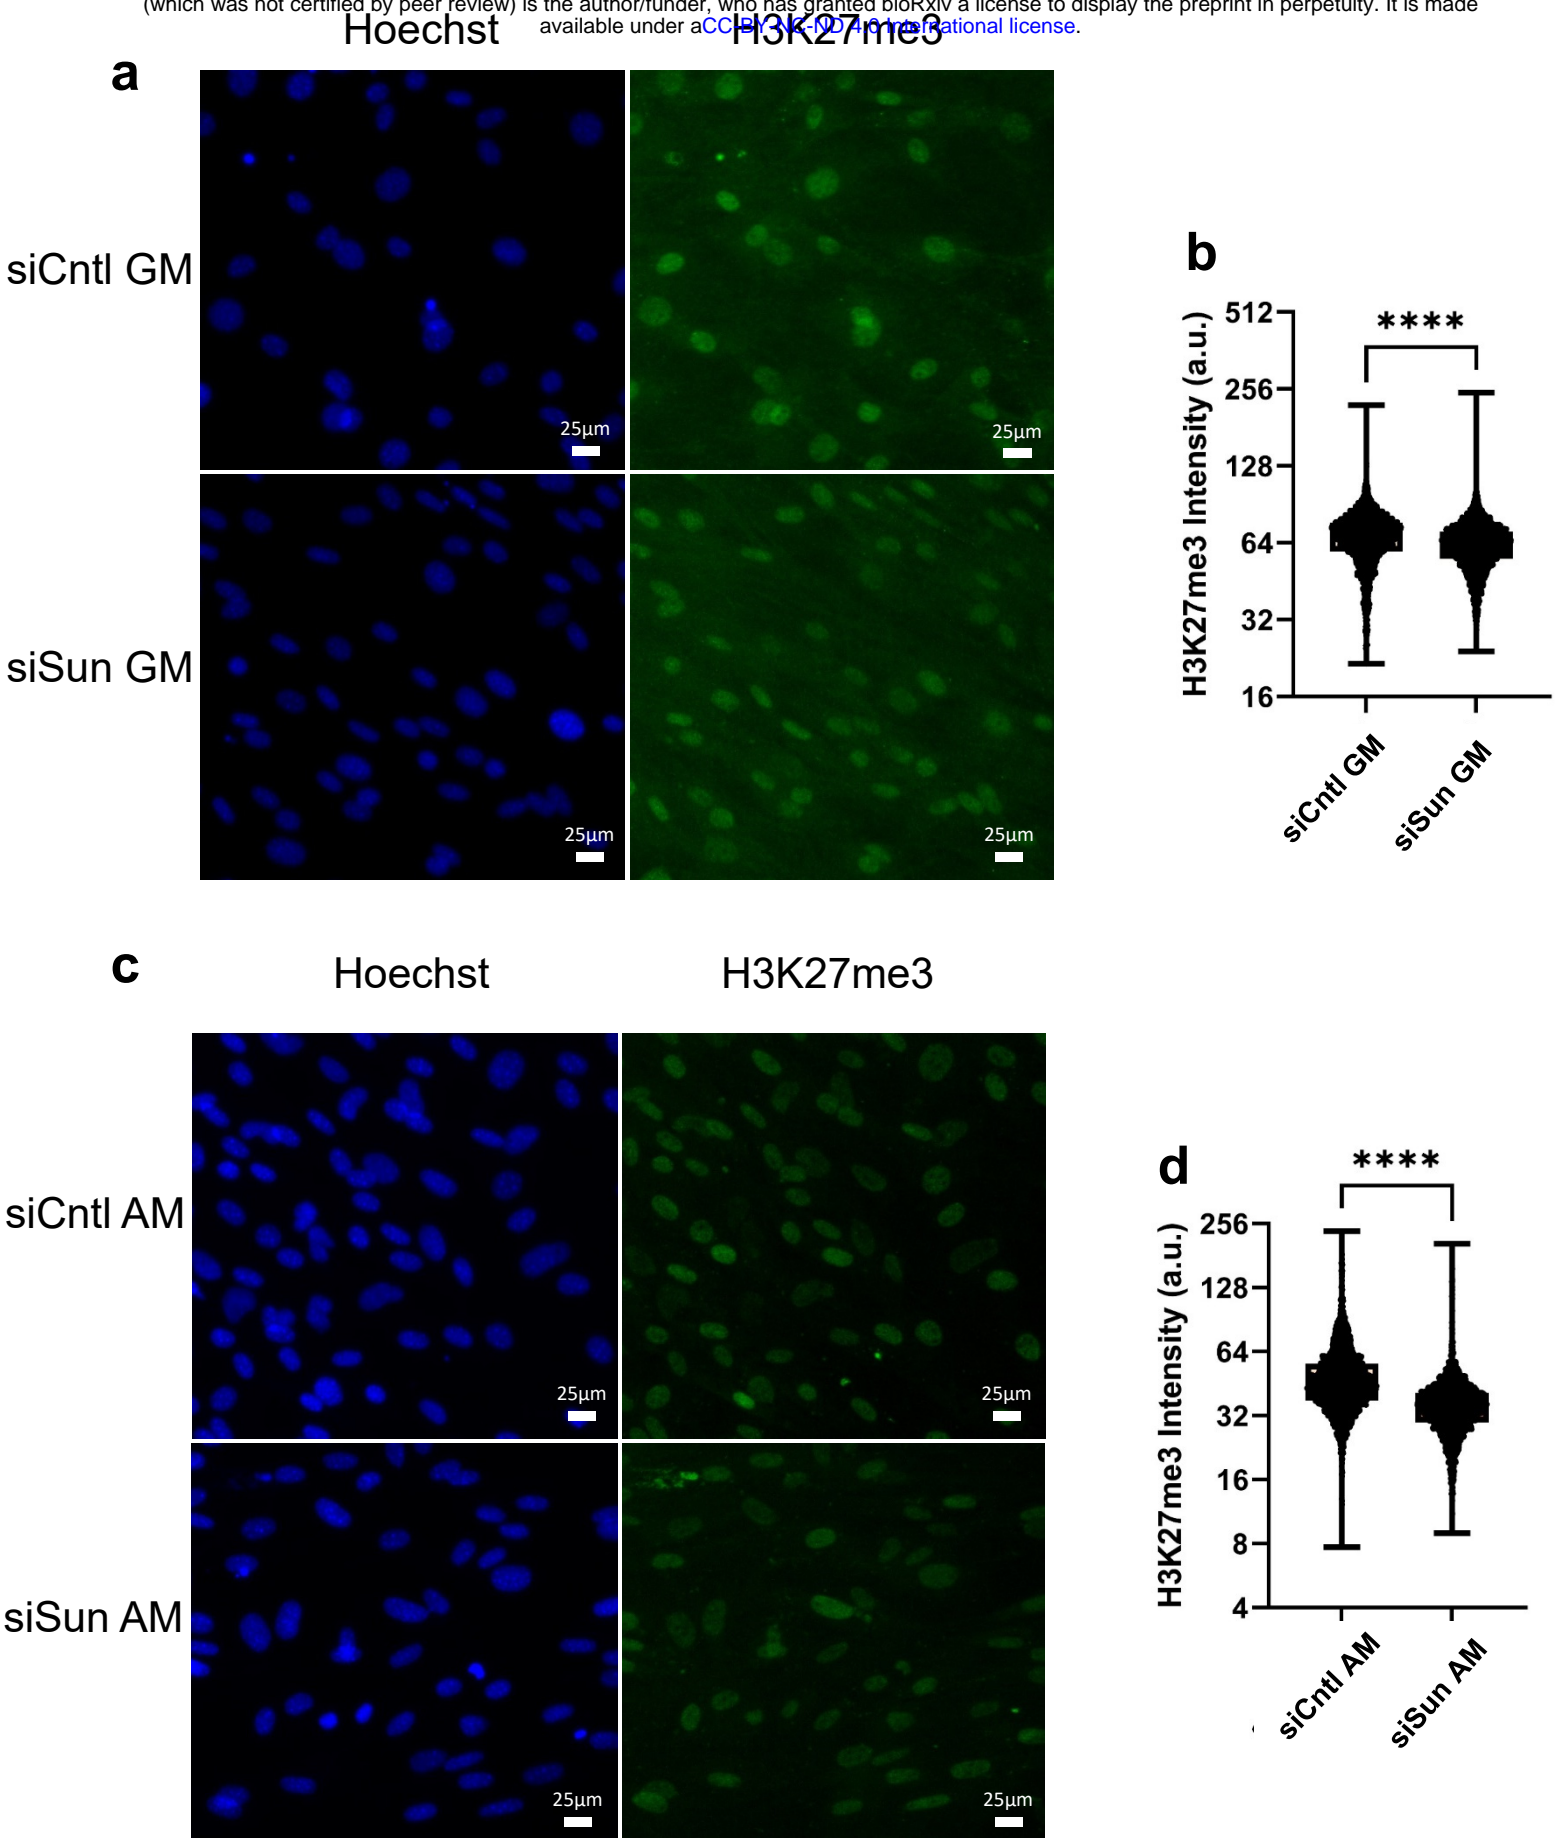

**Fig. S10: Image Analysis of H3K27me3 in MSCs during treatment with siSun or siCntl.** **a** Representative fluorescent images of Nuclei (Hoechst) and H3K27me3 (green) in siSun and siCntl treated MSCs grown in GM. **b** Analysis of fluorescence intensity for H3K27me3 shows 8% reduction of H3K27me3 intensity in siSun GM compared to siCntl GM ( $n = 2730$ ,  $P < 0.0001$ ). **c** Representative images of nuclei (Hoechst) and H3K27me3 (green) of siSun AM vs siCntl AM. **d** Analysis of H3K27me3 intensity. H3K27me3 intensity decreased by 41% in siSun AM compared to siCntl AM ( $n = 2550$ ,  $P < 0.0001$ ). Group analysis was made using Two-Tailed Students T-Test. \*\*\*\*  $P < 0.0001$ .

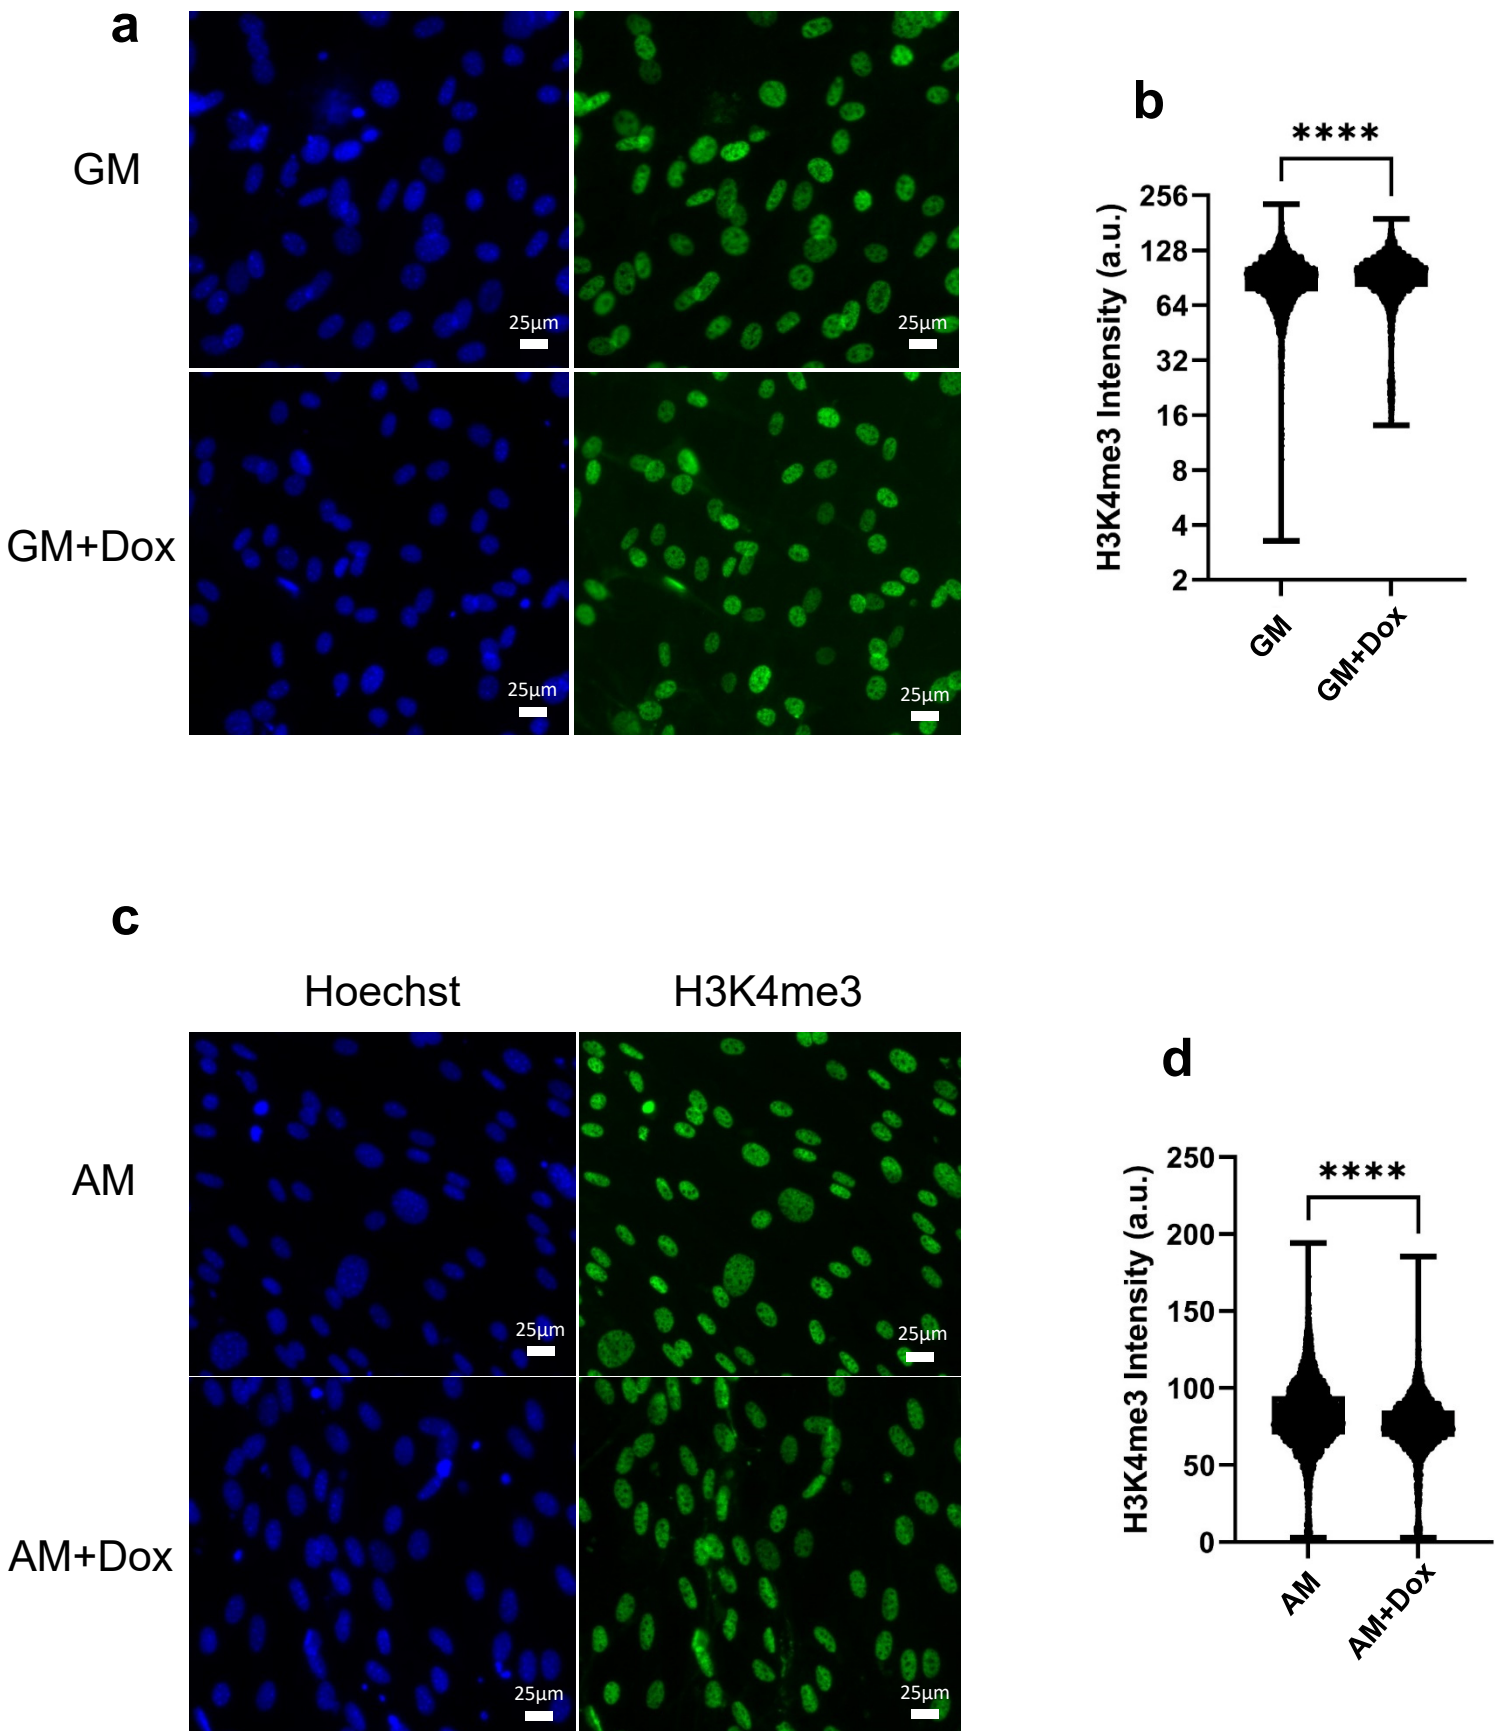

**Fig. S11: Image Analysis of H3K4me3 during expression of dnKASH in MSCs.** **a** Representative fluorescent images of Nuclei (Hoechst) and H3K4me3 (green) in MSCs from GM or GM+Dox. **b** Analysis of fluorescence intensity for H3K4me3 shows 4% increase of H3K4me3 intensity in GM+Dox compared to GM (n = 2900, P < 0.0001). **c** Representative images of nuclei (Hoechst) and H3K4me3 (green) of AM+Dox vs AM. **d** H3K4me3 intensity decreased by 6% in AM+Dox compared to AM (n = 2840, P < 0.0001). Group analysis was made using Two-Tailed Students T-Test. \*\*\*\* P < 0.0001.



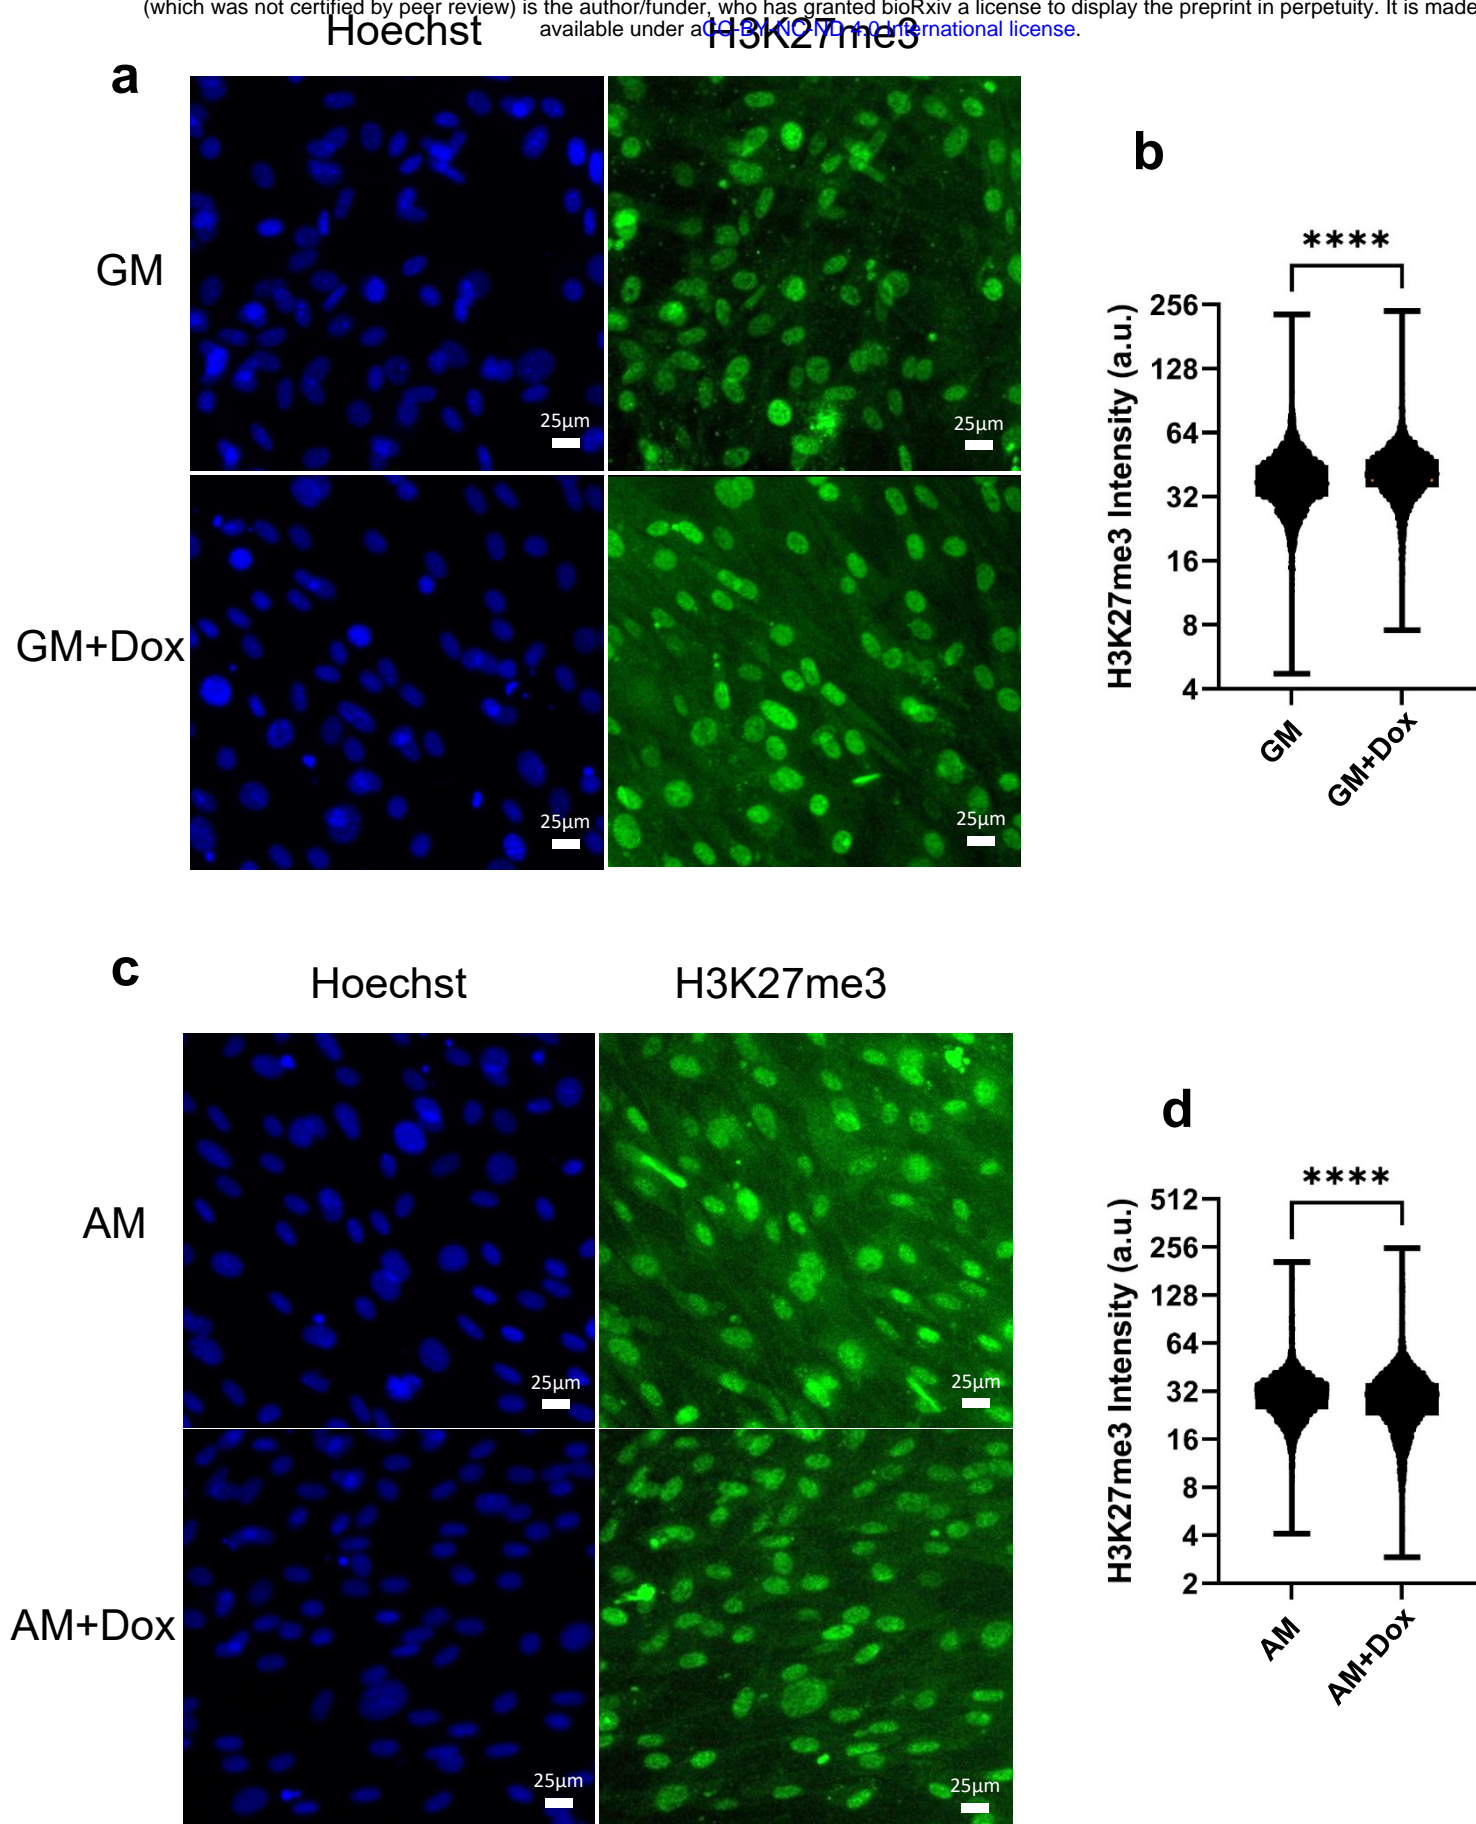

**Fig. S12: Image Analysis of H3K27me3 in MSCs during expression of dnKASH.** **a** Representative fluorescent images of Nuclei (Hoechst) and H3K27me3 (green) of MSCs grown in GM or GM+Dox. **b** Florescence intensity for H3K27me3 showed 12% increase of H3K27me3 intensity in GM+Dox compared to GM ( $n = 2600$ ,  $P < 0.0001$ ). **c** Representative images of nuclei (Hoechst) and H3K27me3 (green) of AM+Dox vs AM. **d** H3K27me3 intensity decreased by 2% in siSun AM compared to siCntl AM ( $n = 2860$ ,  $P < 0.0001$ ). Group analysis was made using Two-Tailed Students T-Test. \*\*\*\*  $P < 0.0001$ .

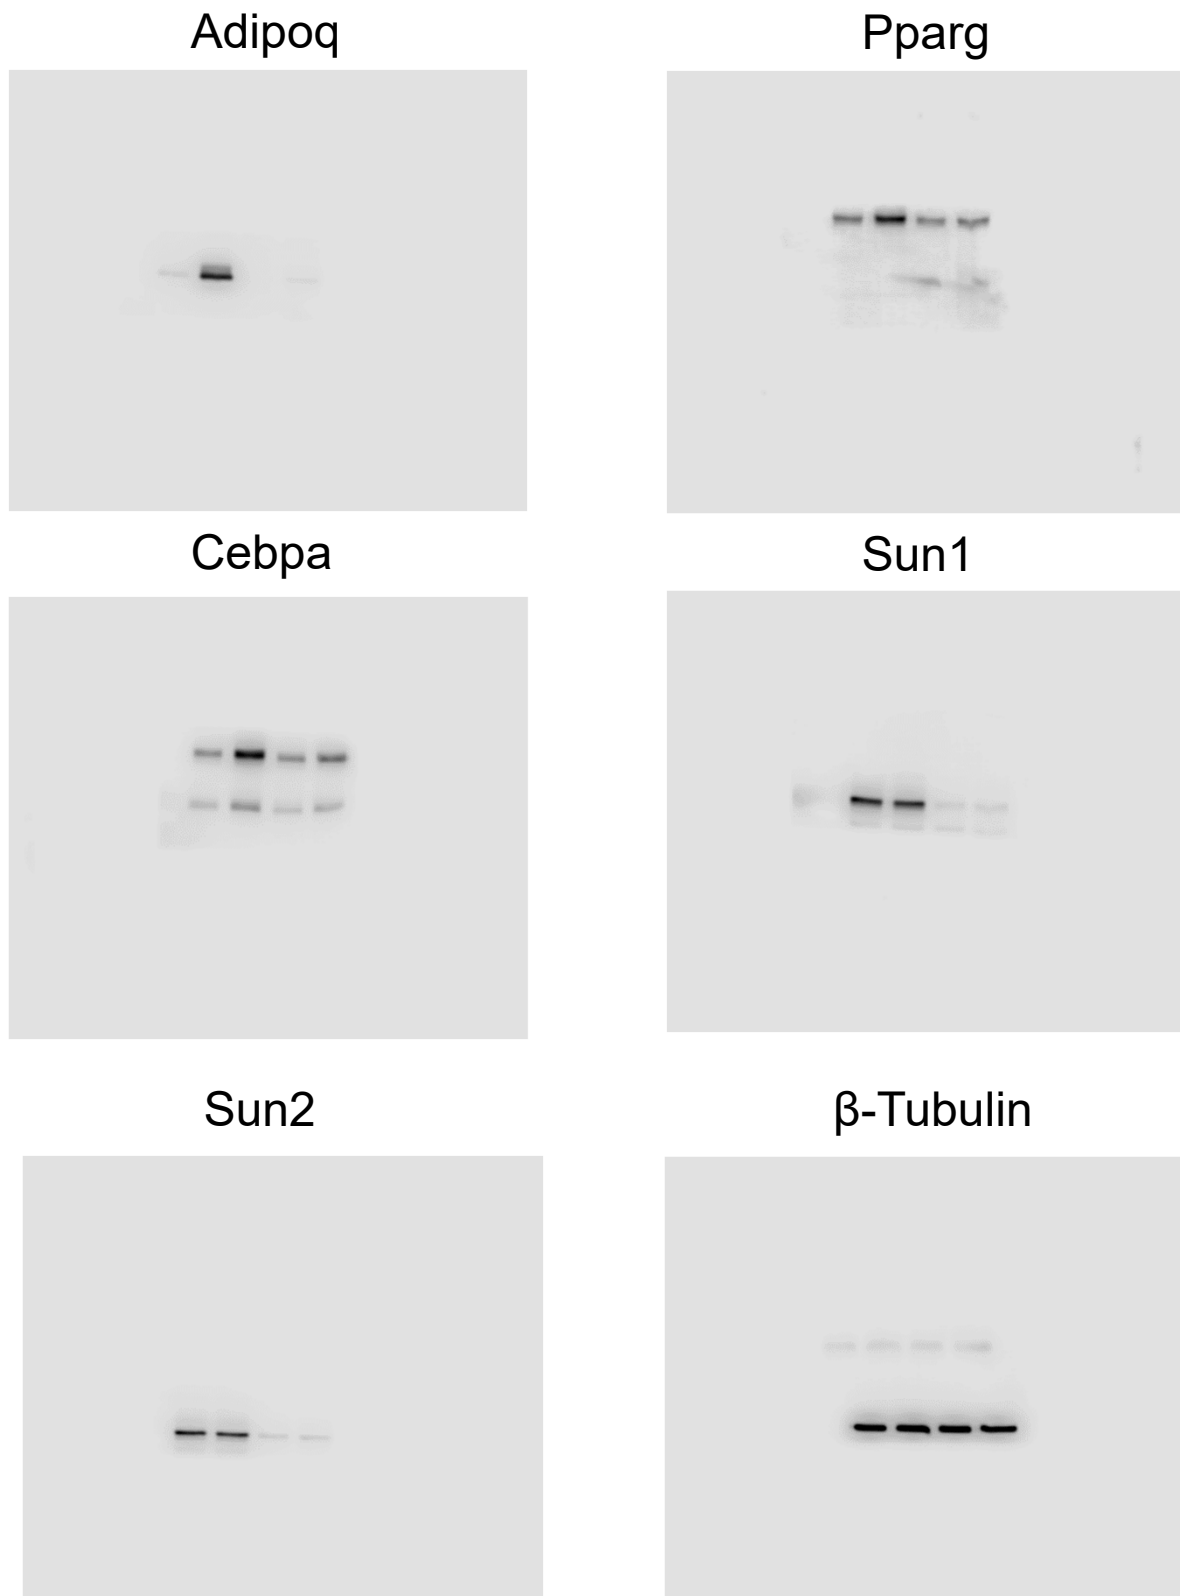

**Fig. S12:** Unprocessed blots for figure 3.

$\beta$ -Tubulin

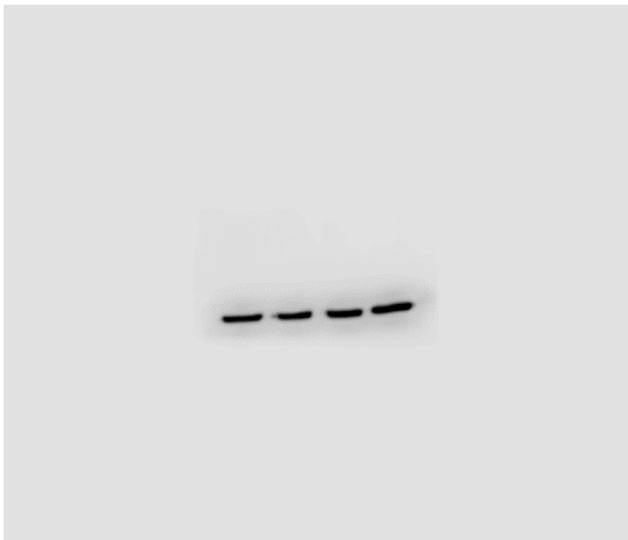

Pparg

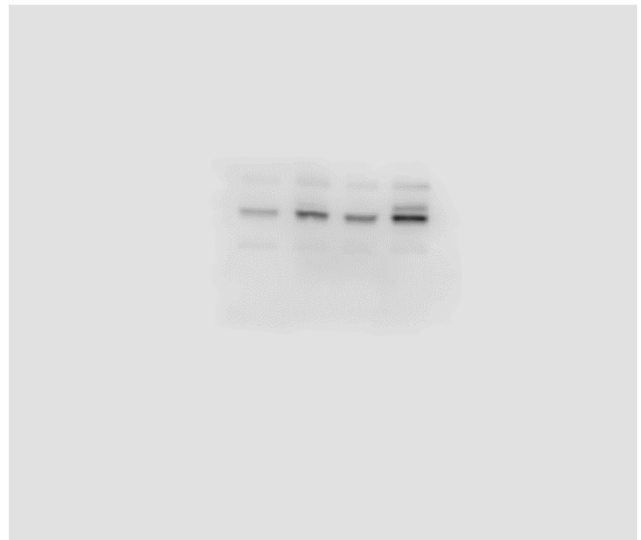

Cebpa

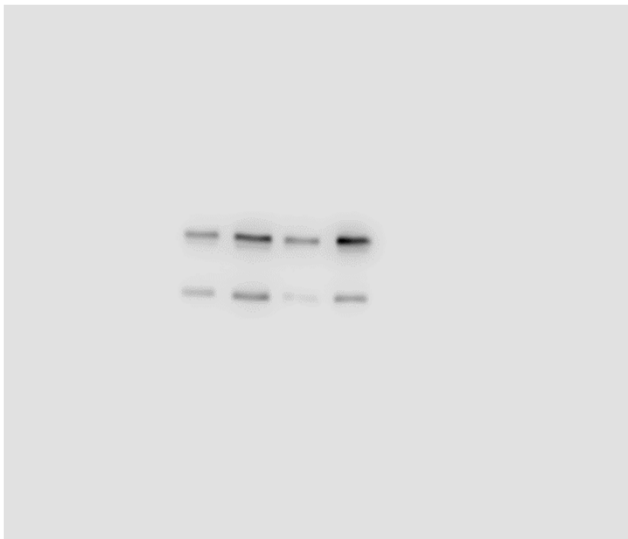

Adipoq

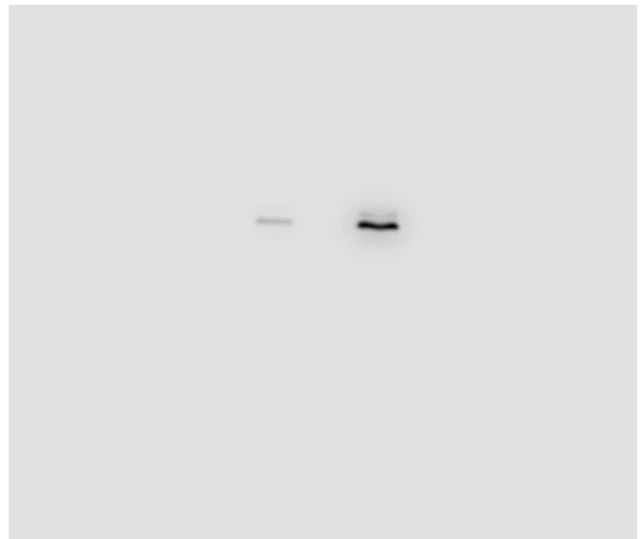

**Fig. S13:** Unprocessed blots for figure 4.

H3K9me3

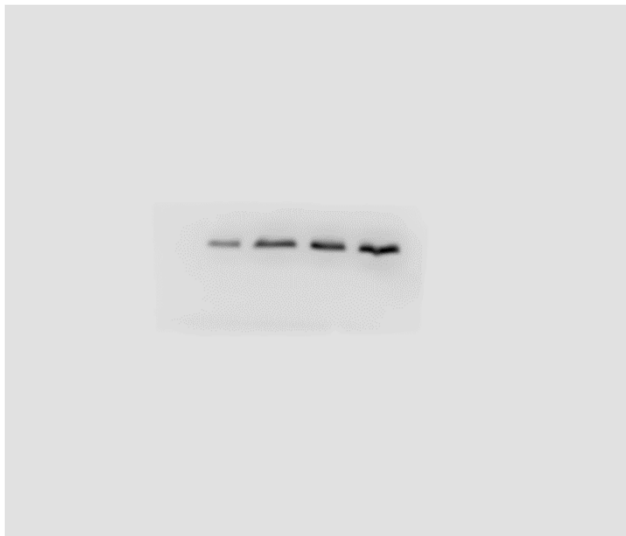

H3K4me3

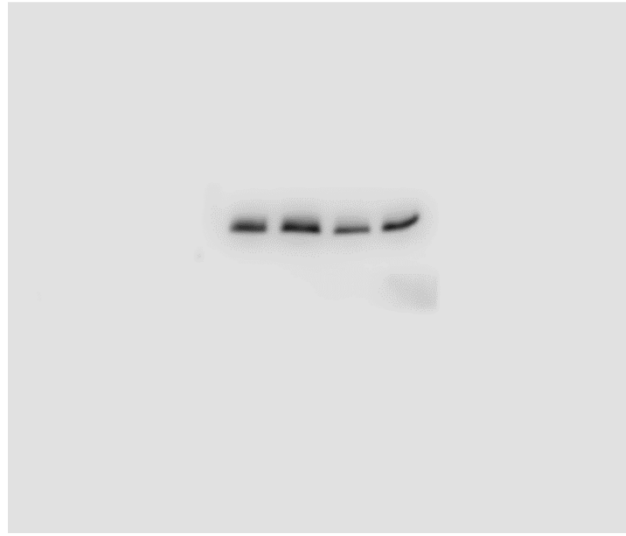

H3K27me3

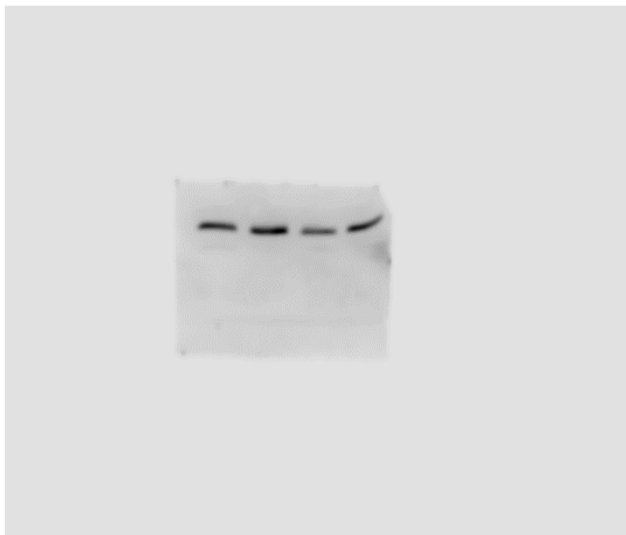

H3

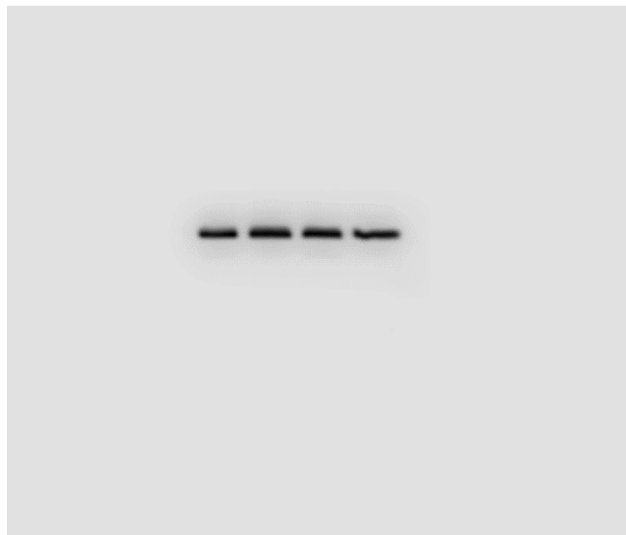

Sun1

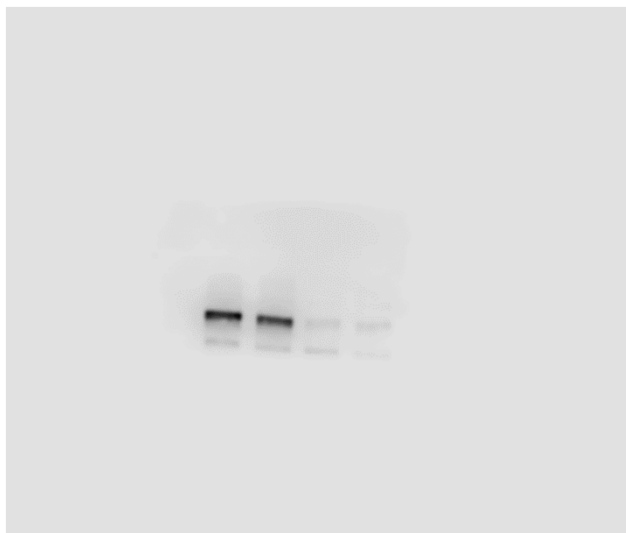

Sun2

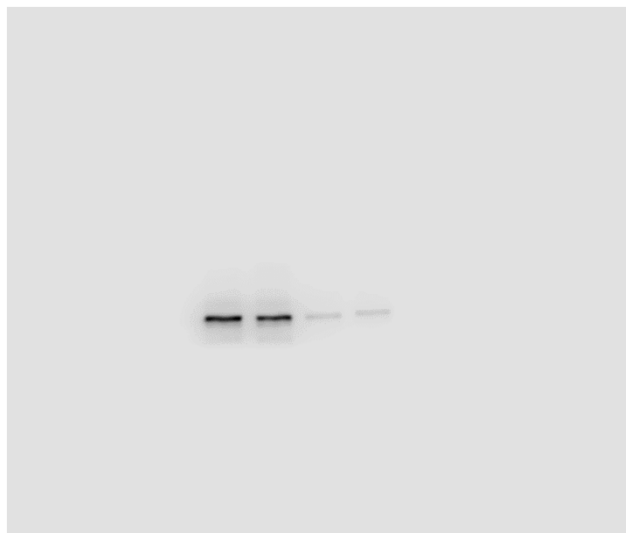

**Fig. S14:** Unprocessed blots for figure 5.

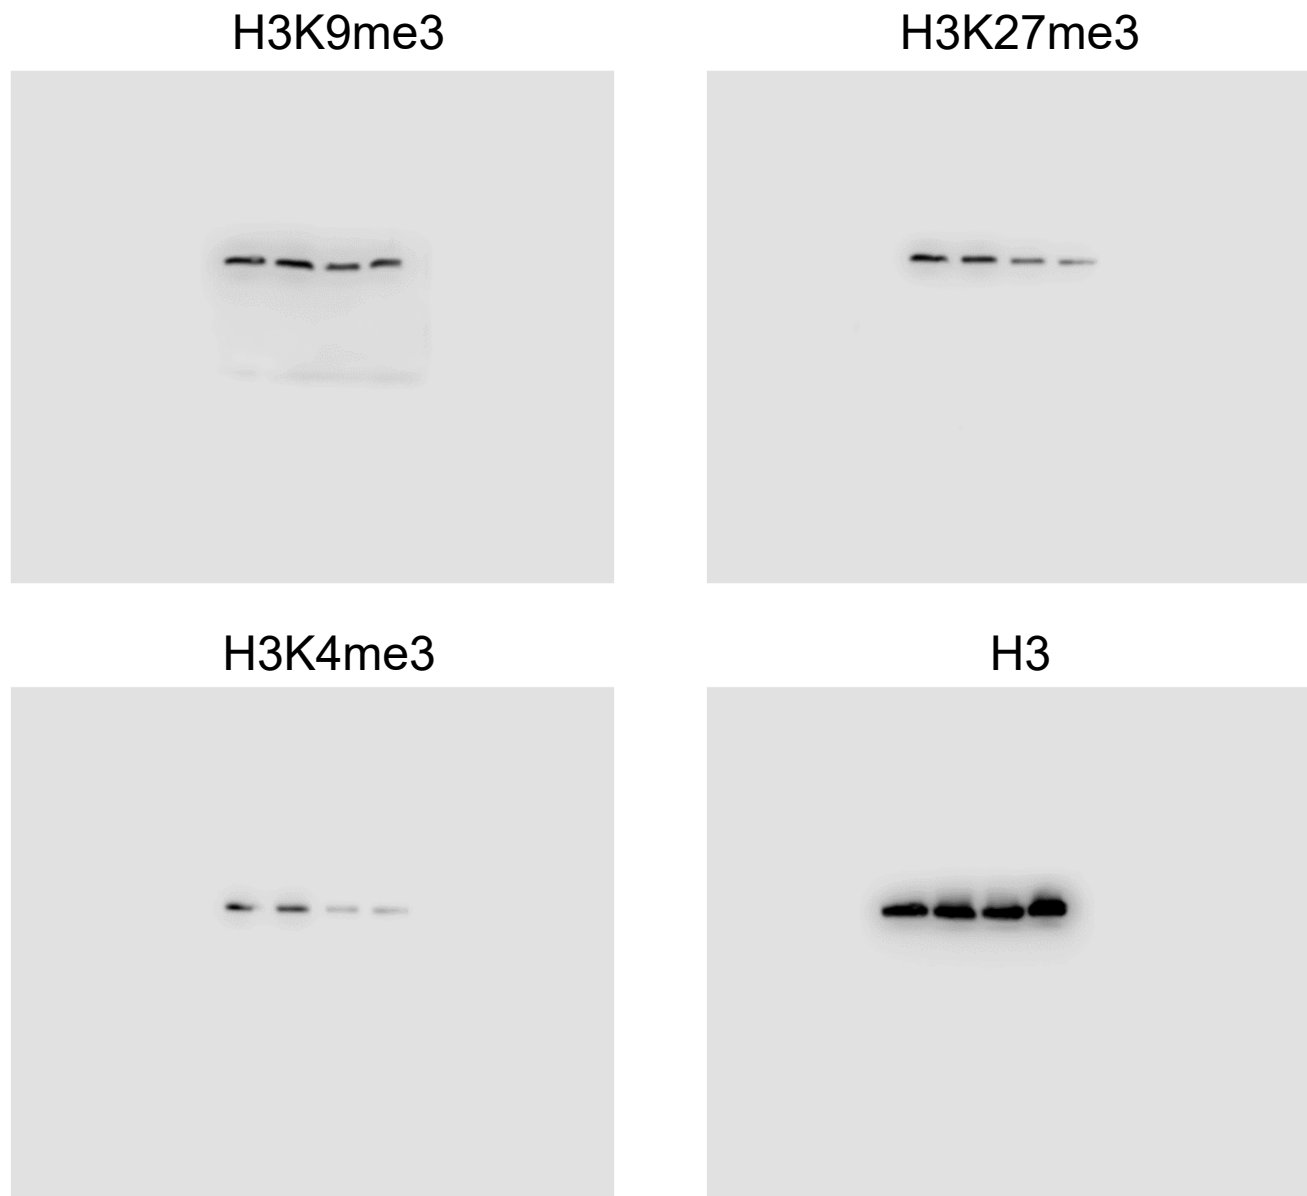

**Fig. S15:** Unprocessed blots for figure 6.
